# Supplementary material
Source: Royal Society of Chemistry journal article supplement (doi:10.1039/d6cc03554j)
Supplement: d6cc03554j1.pdf [file d6cc03554j1.pdf]

## Supporting information for Ruthenium (II)–Catalyzed Regioselective C8–H Acyloxylation of Indolizines with Carboxylic Acids

Karthikeyan Rajkumar,<sup>a</sup> Shikha Dhiman,<sup>a</sup> Veena Vijayan,<sup>a</sup> Vinita Jagtap,<sup>c</sup> Ashutosh Singh,<sup>c</sup>  
Akshay Kamble,<sup>b</sup> Amit Kumar Pandey<sup>c,\*</sup> and Satyasheel Sharma,<sup>a,b\*</sup>

<sup>a</sup>Department of Natural Products, National Institute of Pharmaceutical Education and Research - Ahmedabad,  
Gandhinagar, Gujarat, 382355, INDIA

<sup>b</sup>Department of Medicinal Chemistry, National Institute of Pharmaceutical Education and Research - Ahmedabad,  
Gandhinagar, Gujarat, 382355, INDIA

<sup>c</sup>Department of Biotechnology, National Institute of Pharmaceutical Education and Research - Ahmedabad,  
Gandhinagar, Gujarat, 382355, INDIA

\*Corresponding Author: Dr. Satyasheel Sharma: Email: [sharma.satyasheel@gmail.com](mailto:sharma.satyasheel@gmail.com);

[satyasheel.sharma@niperahm.res.in](mailto:satyasheel.sharma@niperahm.res.in)

Dr. Amit Kumar Pandey: [amit.pandey@niperahm.res.in](mailto:amit.pandey@niperahm.res.in)

|                                                                                                                                   |           |
|-----------------------------------------------------------------------------------------------------------------------------------|-----------|
| <b>1. General Information</b> .....                                                                                               | <b>1</b>  |
| <b>2. Experimental details</b> .....                                                                                              | <b>2</b>  |
| 2.1 General experimental procedure for Synthesis of Indolizine-1-carboxamides1 (1a-1r): .....                                     | 2         |
| 2.2 General experimental procedure for Synthesis of N,N-dimethylindolizine-1-carboxamide <sup>2</sup> (1s):.....                  | 3         |
| 2.2 Optimization of reaction conditions for C-8 Acyloxylation of Indolizines.....                                                 | 8         |
| 2.3 General Procedure for the synthesis of C-8 Acyloxylated Products of Indolizines and their spectral characterization data..... | 10        |
| 2.4. Unsuccessful substrates: .....                                                                                               | 21        |
| <b>3. Scale-up &amp; Post Synthetic Diversification</b> .....                                                                     | <b>21</b> |
| 3.1 Scale up experiment of C-8 Acyloxylation of Indolizine:.....                                                                  | 21        |
| 3.2 Ester hydrolysis reaction of 3ba: .....                                                                                       | 22        |
| 3.3 Functionalisation of hydroxyl group: .....                                                                                    | 22        |
| <b>4. Mechanistic investigation</b> .....                                                                                         | <b>23</b> |
| 4.1 Deuterium labelling experiment: .....                                                                                         | 23        |
| 4.2 Radical quenching experiment: .....                                                                                           | 24        |
| 4.3 High resolution mass analysis: .....                                                                                          | 25        |
| 4.4. Plausible Mechanistic Cycle.....                                                                                             | 26        |
| <b>5. Single crystal X-Ray analysis</b> .....                                                                                     | <b>28</b> |
| <b>6. In vitro Anti-cancer evaluation</b> .....                                                                                   | <b>30</b> |
| 6.1. Preliminary Cytotoxicity assay .....                                                                                         | 30        |
| 6.2 IC <sub>50</sub> Determination.....                                                                                           | 31        |
| 6.3 Cell Migration Assay (Scratch Assay) .....                                                                                    | 33        |
| 6.4 Colony Forming Assay .....                                                                                                    | 34        |
| 6.5 Cell Cycle Assay .....                                                                                                        | 34        |
| 6.6 Apoptosis Assay .....                                                                                                         | 35        |
| <b>7. References</b> .....                                                                                                        | <b>36</b> |
| 8. <sup>1</sup> H and <sup>13</sup> C{ <sup>1</sup> H} & <sup>19</sup> F NMR Spectra of synthesised starting materials.....       | 37        |
| 9. <sup>1</sup> H, <sup>13</sup> C{ <sup>1</sup> H}, and <sup>19</sup> F NMR Spectra of C-8 Acyloxylated indolizines: .....       | 56        |

## 1. General Information

All the reactions were carried out in an oven-dried glass ware. Purified compounds were further dried under vacuum. Yields mentioned refer to purified and spectroscopically pure compounds, unless otherwise stated.

Unless otherwise mentioned, all the reagents like catalysts, starting materials, bases, additives, oxidants were received from commercial vendors like Alfa Aesar<sup>®</sup>, Sigma-Aldrich<sup>®</sup>, BLDpharm<sup>™</sup>, TCI<sup>®</sup>, Qualigens<sup>®</sup> and used without further purification. Solvents like Ethyl acetate, Hexane, Dichloromethane, Chloroform, Methanol were purchased from Qualigens<sup>®</sup> or Sigma-Aldrich<sup>®</sup> and used as received without further purification or distillation. All deuterated solvents were purchased from Sigma-Aldrich<sup>®</sup>, Cambridge Isotope Laboratories, Inc., TCI<sup>®</sup> and used as received.

Reaction progress was monitored by thin layer chromatography, TLC (Merck silica gel 60 F-254, 0.25 mm, precoated plates on alumina) and visualized by fluorescence quenching under UV light. Whenever required, the developed TLCs were visualized by Wagner's staining reagent. Column chromatography was performed on Merck silica gel (230-400 mesh) using ethyl acetate and hexane as mobile phase.

Spectroscopic characterizations were carried at the Central Instrumentation Facility (CIF), National Institute of Pharmaceutical Education and Research-Ahmedabad (NIPER-A). All <sup>1</sup>H-NMR spectra were recorded on Bruker 500 (500 MHz) and <sup>13</sup>C {<sup>1</sup>H}-NMR spectra were recorded on a Bruker 500 (125 MHz) in CDCl<sub>3</sub> (99.8 atom % D, contains 1 % (v/v)) or solvent as mentioned per spectra. <sup>19</sup>F NMR was recorded on Bruker 500 (470 MHz). Both <sup>1</sup>H-NMR and <sup>13</sup>C {<sup>1</sup>H} NMR chemical shifts were reported in parts per million downfield from tetramethylsilane ( $\delta$  0.0ppm) with the solvent residual peak (CDCl<sub>3</sub>,  $\delta$  7.26 ppm, s). Data were reported as  $\delta$  (chemical shift as ppm), *J* (coupling constant in Hz) and the carbon spectra were reported only in  $\delta$  (chemical shift). Multiplicities were indicated by (s = singlet, d = doublet, t = triplet, q = quartet, p = pentet, h = heptet, m = multiplet, dd = doublet of doublets, tt = triplet of triplets, ddd = doublet of doublets of doublets, td = triplet of doublets, dt = doublet of triplets, qd = quartet of doublets).

High-resolution Mass Spectrometry (HRMS) was done on HRMS Thermo Orbitrap-Fusion<sup>™</sup> in positive (ESI<sup>+</sup> ion) mode. Single crystal X-Ray analysis was performed on SuperNova, Single source at offset/far, HyPix3000 diffractometer.

## 2. Experimental details

### 2.1 General experimental procedure for Synthesis of Indolizine-1-carboxamides<sup>1</sup> (1a-1r):

The synthesis of 3-substituted indolizine-1-carboxamides were performed in a one-pot reaction as reported by Wang and co-workers<sup>1</sup>, with slight modifications in base and oxidants. Pyridine (10 mmol) and halogenated hydrocarbons (10 mmol) were reacted at room temperature in an oven dried round bottom flask with a stopper for 1h in 0.5 mL of DMF to form *in situ* generated pyridinium salt. Then K<sub>2</sub>CO<sub>3</sub> (40 mmol), was added to the reaction mixture and stirred for 10 minutes, followed by the addition of corresponding acrylamides (10 mmol). MnO<sub>2</sub> (5 equiv.) was added as an oxidant to the mixture along with and 10-15 mL of DMF. Then the mixture was heated at 100 °C for another 12 h (the reaction course was monitored by TLC). After the reaction was complete, the mixture was filtered under vacuum. The crude filtrate was poured into water and extracted by ethyl acetate (10 mL × 3). The organic layers were combined, washed with brine, dried over anhydrous sodium sulphate and filtered. The organic solvent was removed under vacuum and the residue was purified by column chromatography (230-400 mesh, 1.5:1 EtOAc/Hexane), to yield the indolizines.

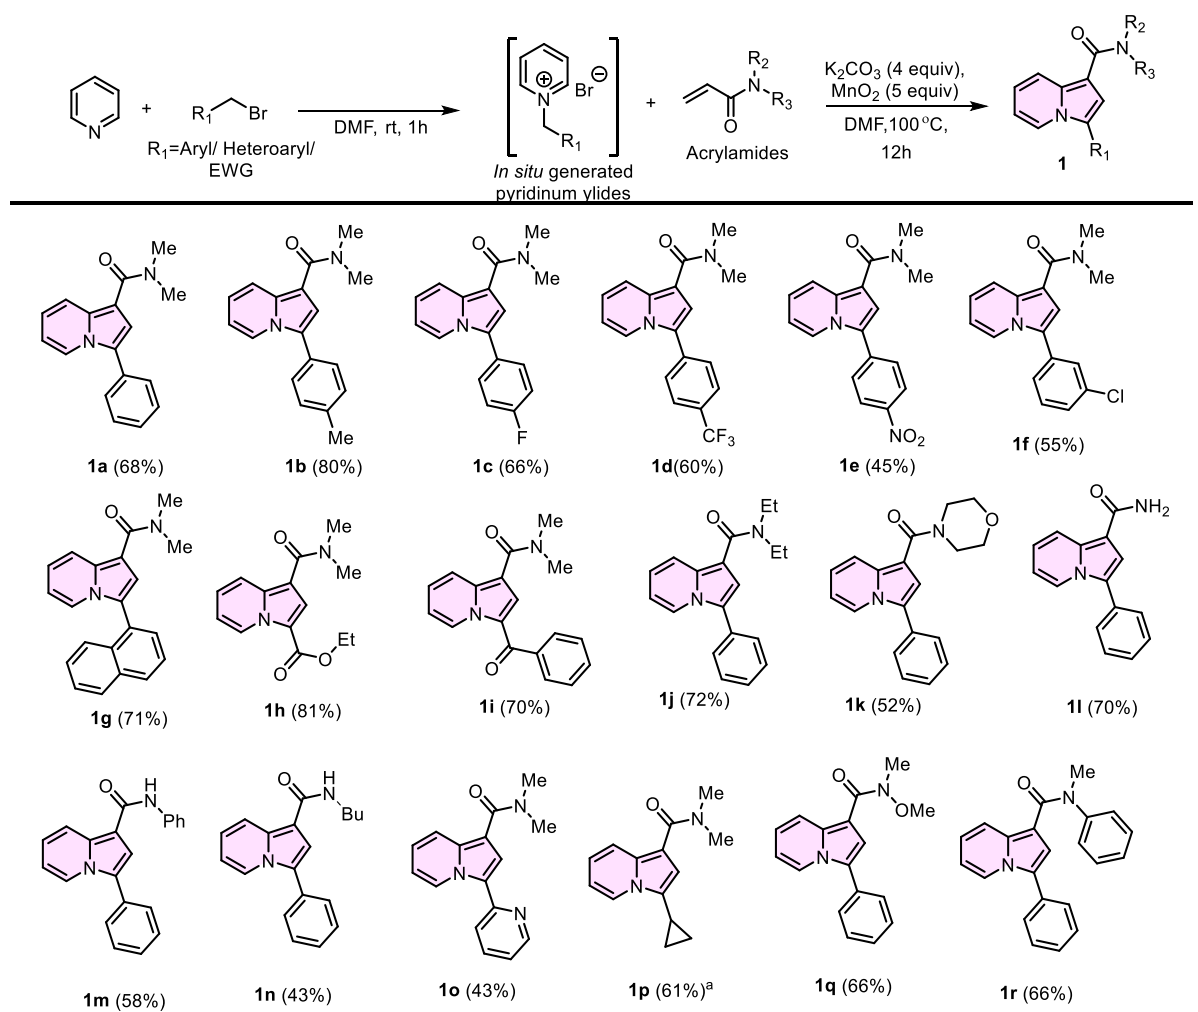

<sup>a</sup> The reaction time for *in situ* generation of Pyridinium ylide is 12h, in the case of **1p**

**Scheme-S1:** Synthesis of Indolizine-1-carboxamides (1a-1r).

## 2.2 General experimental procedure for Synthesis of N,N-dimethylindolizine-1-carboxamide<sup>2</sup> (1s):

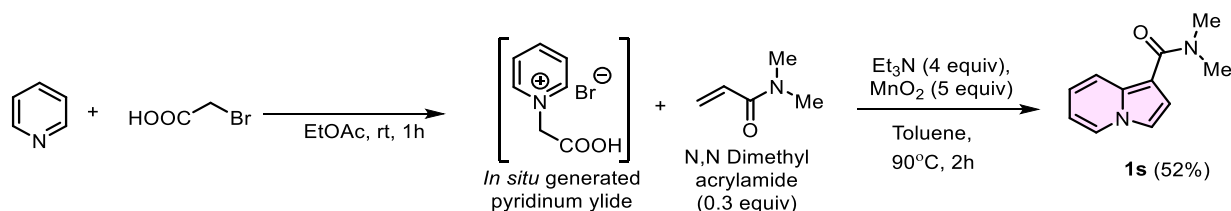

Pyridine (10 mmol) and Bromoacetic acid (10 mmol) were reacted at 60°C in an oven dried round bottom flask with a stopper for 4h in 0.5 mL of Ethyl acetate to form *in situ* generated pyridinium salt. Then triethylamine (40 mmol) was added to the reaction mixture and stirred for 10 minutes, followed by the addition of N,N dimethyl acrylamide (3 mmol) and MnO<sub>2</sub> (5 equiv.) The mixture was heated at 90°C for 12 h with toluene (the reaction course was monitored by TLC). After the reaction was complete, the mixture was filtered under vacuum and washed off with acetone. The crude filtrate was concentrated under vacuum and the residue was purified by column chromatography (230-400 mesh, 1.5:1 EtOAc/Hexane), to yield the indolizine (**1s**).

The spectral characterization of synthesised indolizines (**1a-1s**) were concurrent with the literature<sup>1-3</sup> and the characterization of the new compounds are also discussed here.

### N,N-Dimethyl-3-phenylindolizine-1-carboxamide (**1a**).

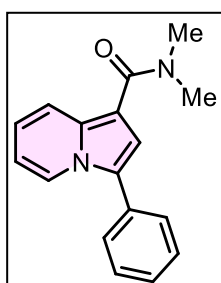

Dark brown oil; 1.8g, (68%). <sup>1</sup>H NMR (500 MHz, Chloroform-*d*) δ 8.26 (d, *J* = 7.2 Hz, 1H), 7.99 (d, *J* = 9.1 Hz, 1H), 7.56 (d, *J* = 7.7 Hz, 2H), 7.51 (t, *J* = 7.0 Hz, 2H), 7.41 (t, *J* = 7.3 Hz, 1H), 7.00 (d, *J* = 2.0 Hz, 1H), 6.94 (t, *J* = 7.8 Hz, 1H), 6.63 (t, *J* = 6.9 Hz, 1H), 3.23 (s, 6H). <sup>13</sup>C{<sup>1</sup>H} NMR (126 MHz, CDCl<sub>3</sub>) δ 167.7, 135.1, 131.6, 129.1, 128.5, 127.8, 125.1, 122.6, 120.3, 120.2, 114.6, 112.1, 107.5, 37.2. HRMS (ESI-Orbitrap)

*m/z*: calcd for Chemical Formula: C<sub>17</sub>H<sub>17</sub>N<sub>2</sub>O<sup>+</sup> [M+H]<sup>+</sup> 265.1335, found 265.1347.

### N,N-Dimethyl-3-(*p*-tolyl)indolizine-1-carboxamide (**1b**).

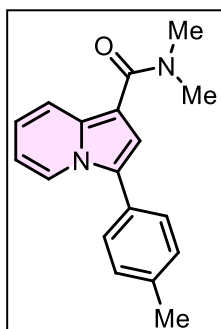

Light green solid, 2.2g, (80%). M.P: 167-168°C. <sup>1</sup>H NMR (500 MHz, CDCl<sub>3</sub>) δ 8.2 (d, *J* = 7.1 Hz, 1H), 8.0 (d, *J* = 9.1 Hz, 1H), 7.4 (d, *J* = 8.2 Hz, 2H), 7.3 (d, *J* = 7.8 Hz, 2H), 6.9 (s, 1H), 6.9 (ddd, *J* = 9.1, 6.5, 1.1 Hz, 1H), 6.6 (td, *J* = 6.8, 1.4 Hz, 1H), 3.2 (s, 6H), 2.4 (s, 3H). <sup>13</sup>C{<sup>1</sup>H} NMR (125 MHz, CDCl<sub>3</sub>) δ 167.8, 137.7, 134.9, 129.8, 128.6, 128.5, 125.1, 122.7, 120.2, 120.1, 114.4, 112.0, 107.3, 37.6, 21.3. HRMS (ESI-

Orbitrap) *m/z*: calcd for Chemical Formula: C<sub>18</sub>H<sub>19</sub>N<sub>2</sub>O<sup>+</sup> [M+H]<sup>+</sup> 279.1492, found 279.1510

### 3-(4-Fluorophenyl)-N,N-dimethylindolizine-1-carboxamide (1c).

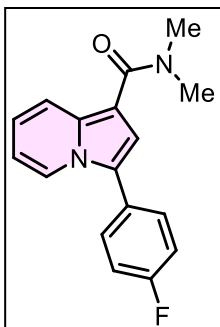

Dark brown sticky solid; 1.8g, (66%).  $^1\text{H NMR}$  (500 MHz,  $\text{CDCl}_3$ )  $\delta$  8.14 (d,  $J = 7.1$  Hz, 1H), 7.97 (d,  $J = 9.1$  Hz, 1H), 7.51 (dd,  $J = 8.3, 5.4$  Hz, 2H), 7.20 (t,  $J = 8.4$  Hz, 2H), 6.95 (s, 1H), 6.96 – 6.90 (m, 1H), 6.64 (t,  $J = 6.8$  Hz, 1H), 3.22 (s, 6H).  $^{13}\text{C}\{^1\text{H}\}$  NMR (126 MHz,  $\text{CDCl}_3$ )  $\delta$  167.7, 163.3, 161.3, 135.0, 130.5, 130.4, 127.7, 127.6, 124.0, 122.4, 120.3, 120.2, 116.2, 116.1, 114.6, 112.2, 107.4, 37.2.  $^{19}\text{F NMR}$  (470 MHz,  $\text{CDCl}_3$ )  $\delta$  -113.4.

**HRMS (ESI-Orbitrap) m/z:** calcd for Chemical Formula:  $\text{C}_{17}\text{H}_{16}\text{FN}_2\text{O}^+$   $[\text{M}+\text{H}]^+$  283.1241, found 283.1252.

### N,N-Dimethyl-3-(4-(trifluoromethyl)phenyl)indolizine-1-carboxamide (1d).

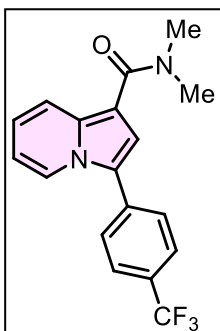

Brown sticky solid; 1.9g, (60%).  $^1\text{H NMR}$  (500 MHz, Chloroform-*d*)  $\delta$  8.28 (d,  $J = 7.1$  Hz, 1H), 7.98 (d,  $J = 9.1$  Hz, 1H), 7.76 (d,  $J = 8.0$  Hz, 2H), 7.69 (d,  $J = 8.0$  Hz, 2H), 7.06 (s, 1H), 6.99 (t,  $J = 7.9$  Hz, 1H), 6.70 (t,  $J = 7.6$  Hz, 1H), 3.23 (s, 6H).  $^{13}\text{C}\{^1\text{H}\}$  NMR (126 MHz,  $\text{CDCl}_3$ )  $\delta$  167.5, 135.6, 135.2, 129.6, 129.3, 129.0, 128.3, 126.2, 126.1, 126.1, 126.1, 125.2, 123.5, 123.0, 122.4, 120.9, 120.4, 115.5, 112.7, 108.1, 37.4.  $^{19}\text{F NMR}$  (471

**MHz,  $\text{CDCl}_3$ )  $\delta$  -62.6. HRMS (ESI-Orbitrap) m/z:** calcd for Chemical Formula:  $\text{C}_{18}\text{H}_{16}\text{F}_3\text{N}_2\text{O}^+$   $[\text{M}+\text{H}]^+$  333.1209, found 333.1211.

### N,N-Dimethyl-3-(4-nitrophenyl)indolizine-1-carboxamide (1e).

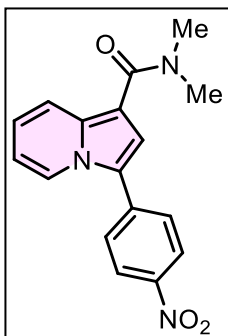

Red solid; 1.4g, (45%). M.P.:170-172°C.  $^1\text{H NMR}$  (500 MHz,  $\text{CDCl}_3$ )  $\delta$  8.36 (d,  $J = 8.0$  Hz, 3H), 7.99 (d,  $J = 9.1$  Hz, 1H), 7.75 (d,  $J = 8.4$  Hz, 2H), 7.14 (s, 1H), 7.04 (dd,  $J = 9.1, 6.6$  Hz, 1H), 6.76 (t,  $J = 6.8$  Hz, 1H), 3.23 (s, 6H).  $^{13}\text{C}\{^1\text{H}\}$  NMR (125 MHz,  $\text{CDCl}_3$ )  $\delta$  167.1, 146.3, 138.1, 136.4, 127.8, 124.6, 122.8, 122.5, 121.6, 120.5, 116.5, 113.2, 109.0, 38.6. **HRMS (ESI-Orbitrap) m/z:** calcd for Chemical Formula:  $\text{C}_{17}\text{H}_{16}\text{N}_3\text{O}_3^+$   $[\text{M}+\text{H}]^+$

310.1186, found 310.1209.

### 3-(3-Chlorophenyl)-N,N-dimethylindolizine-1-carboxamide (1f).

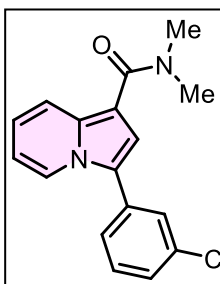

Dark green semi solid; 1.6g (55%).  $^1\text{H NMR}$  (500 MHz, Chloroform-*d*)  $\delta$  8.24 (d,  $J = 7.1$  Hz, 1H), 7.98 (d,  $J = 9.1$  Hz, 1H), 7.55 (s, 1H), 7.47 – 7.42 (m, 2H), 7.40 – 7.35 (m, 1H), 7.01 (s, 1H), 6.96 (dd,  $J = 9.2, 6.5$  Hz, 1H), 6.68 (t,  $J = 6.8$  Hz, 1H), 3.23 (s, 6H).  $^{13}\text{C}\{^1\text{H}\}$  NMR (126 MHz,  $\text{CDCl}_3$ )  $\delta$  167.5, 135.4, 135.0, 133.4, 130.4, 128.3, 127.7, 126.4, 123.5, 122.5, 120.7, 120.3, 115.1, 112.5, 107.7, 38.0. **HRMS (ESI-Orbitrap)**

**m/z:** calcd for Chemical Formula:  $\text{C}_{17}\text{H}_{16}\text{ClN}_2\text{O}^+$   $[\text{M}+\text{H}]^+$  299.0946, found 299.0948

### N,N-Dimethyl-3-(naphthalen-1-yl)indolizine-1-carboxamide (1g).

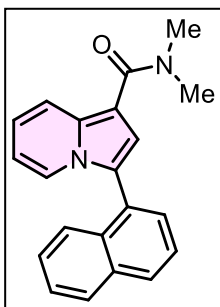

Reddish solid; 2.2g (71%). M.P: 165-167°C.  $^1\text{H NMR}$  (500 MHz, Chloroform-*d*)  $\delta$  8.09 (d,  $J = 9.1$  Hz, 1H), 7.99 (t,  $J = 8.2$  Hz, 2H), 7.63 – 7.60 (m, 2H), 7.60 – 7.55 (m, 2H), 7.53 (d,  $J = 9.0$  Hz, 1H), 7.45 (d,  $J = 7.5$  Hz, 1H), 7.11 (s, 1H), 6.97 (t,  $J = 8.8, 7.3$  Hz, 1H), 6.54 (t,  $J = 6.8$  Hz, 1H), 3.27 (s, 6H).  $^{13}\text{C}\{^1\text{H}\}$  NMR (126 MHz,  $\text{CDCl}_3$ )  $\delta$  167.9, 135.0, 133.9, 132.3, 129.3, 129.3, 128.8, 128.7, 126.9, 126.3, 125.6, 125.6, 123.4, 122.8, 120.3, 120.1, 116.0, 111.8, 107.0, 37.5. HRMS (ESI-Orbitrap)  $m/z$ : calcd for Chemical Formula:  $\text{C}_{21}\text{H}_{19}\text{N}_2\text{O}^+$   $[\text{M}+\text{H}]^+$  315.1492, found 315.1501.

#### Ethyl 1-(dimethyl carbamoyl) indolizine-3-carboxylate (1h).

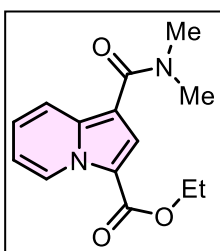

Light brown solid; 2.1g (81%). M.P: 183-184°C.  $^1\text{H NMR}$  (500 MHz,  $\text{CDCl}_3$ )  $\delta$  9.5 (dt,  $J = 7.1, 1.1$  Hz, 1H), 8.1 (dt,  $J = 9.0, 1.3$  Hz, 1H), 7.6 (s, 1H), 7.2 (ddd,  $J = 9.0, 6.7, 1.1$  Hz, 1H), 6.9 (td,  $J = 6.9, 1.4$  Hz, 1H), 4.4 (q,  $J = 7.1$  Hz, 2H), 3.2 (s, 6H), 1.4 (t,  $J = 7.1$  Hz, 3H).  $^{13}\text{C}\{^1\text{H}\}$  NMR (125 MHz,  $\text{CDCl}_3$ )  $\delta$  166.6, 161.3, 138.6, 127.3, 124.0, 121.8, 119.7, 114.0, 113.4, 108.4, 60.1, 14.6. HRMS (ESI-Orbitrap)  $m/z$ : calcd for Chemical Formula:  $\text{C}_{14}\text{H}_{17}\text{N}_2\text{O}_3^+$   $[\text{M}+\text{H}]^+$  261.1234, found 261.1235

#### 3-Benzoyl-N,N-dimethylindolizine-1-carboxamide (1i).

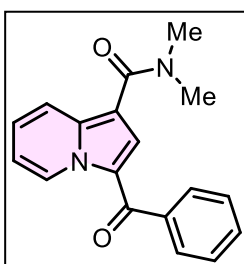

Dark brown oil; 2g, (70%).  $^1\text{H NMR}$  (500 MHz, Chloroform-*d*)  $\delta$  9.93 (d,  $J = 7.0$  Hz, 1H), 8.05 (d,  $J = 9.0$  Hz, 1H), 7.78 (d,  $J = 7.1$  Hz, 2H), 7.58 – 7.51 (m, 1H), 7.48 (t,  $J = 7.4$  Hz, 2H), 7.44 (s, 1H), 7.34 (t,  $J = 8.3, 7.3$  Hz, 1H), 7.03 (td,  $J = 6.9, 1.4$  Hz, 1H), 3.13 (s, 6H).  $^{13}\text{C}\{^1\text{H}\}$  NMR (126 MHz,  $\text{CDCl}_3$ )  $\delta$  185.1, 166.4, 140.2, 139.3, 131.3, 128.9, 128.6, 128.3, 126.4, 126.3, 121.5, 119.4, 115.0, 109.7, 37.7. HRMS (ESI-Orbitrap)  $m/z$ : calcd for Chemical Formula:  $\text{C}_{18}\text{H}_{17}\text{N}_2\text{O}_2^+$   $[\text{M}+\text{H}]^+$  293.1285, found 293.1311

#### N,N-Diethyl-3-phenylindolizine-1-carboxamide (1j).

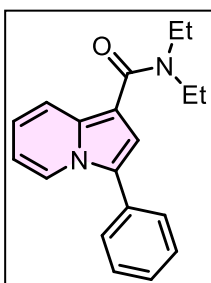

Dark green sticky solid; 2.1g (72%).  $^1\text{H NMR}$  (500 MHz, Chloroform-*d*)  $\delta$  8.25 (d,  $J = 7.1$  Hz, 1H), 7.98 (d,  $J = 9.1$  Hz, 1H), 7.56 (d,  $J = 7.6$  Hz, 2H), 7.51 (t,  $J = 7.5$  Hz, 2H), 7.41 (t,  $J = 7.3$  Hz, 1H), 6.95 (s, 1H), 6.91 (t,  $J = 7.8$  Hz, 1H), 6.62 (t,  $J = 6.9$  Hz, 1H), 3.64 (q,  $J = 7.1$  Hz, 4H), 1.30 (t,  $J = 8.3, 6.5$  Hz, 6H).  $^{13}\text{C}\{^1\text{H}\}$  NMR (126 MHz,  $\text{CDCl}_3$ )  $\delta$  167.0, 135.0, 131.7, 129.1, 128.5, 127.7, 125.0, 122.5, 120.2, 120.0, 113.5, 112.0, 108.2, 41.6,

13.9. HRMS (ESI-Orbitrap)  $m/z$ : calcd for Chemical Formula:  $\text{C}_{19}\text{H}_{21}\text{N}_2\text{O}^+$   $[\text{M}+\text{H}]^+$  293.1648, found 293.1659.

#### Morpholino(3-phenylindolizin-1-yl)methanone (1k).

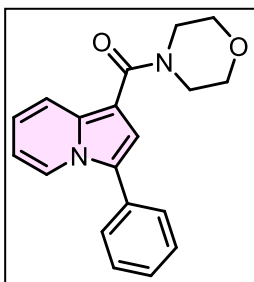

Dark green solid; 1.6g (52%). M.P: 161-163°C.  $^1\text{H NMR}$  (500 MHz, Chloroform-*d*)  $\delta$  8.27 (d,  $J = 7.1$  Hz, 1H), 7.92 (d,  $J = 9.1$  Hz, 1H), 7.56 (d,  $J = 7.7$  Hz, 2H), 7.52 (t,  $J = 6.9$  Hz, 2H), 7.42 (t,  $J = 7.3, 6.7$  Hz, 1H), 6.97 (t,  $J = 7.9$  Hz, 1H), 6.94 (d,  $J = 1.6$  Hz, 1H), 6.66 (t,  $J = 6.9$  Hz, 1H), 3.87 – 3.82 (m, 4H), 3.80 – 3.75 (m, 4H).  $^{13}\text{C}\{^1\text{H}\}$  NMR (126 MHz,  $\text{CDCl}_3$ )  $\delta$  166.9, 135.0, 131.4, 129.1, 128.5, 128.0, 125.5, 122.8, 120.6, 119.8, 114.3, 112.2, 106.6, 67.2, 45.7. HRMS (ESI-Orbitrap)  $m/z$ : calcd for Chemical Formula:  $\text{C}_{19}\text{H}_{19}\text{N}_2\text{O}_2^+$   $[\text{M}+\text{H}]^+$  307.1441, found 307.1460.

### 3-Phenylindolizine-1-carboxamide (1l).

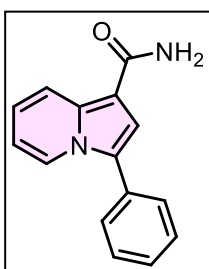

Yellow powder; 1.65g, (70%).  $^1\text{H NMR}$  (500 MHz, Chloroform-*d*)  $\delta$  8.44 (d,  $J = 9.1$  Hz, 1H), 8.28 (d,  $J = 7.1$  Hz, 1H), 7.55 (t,  $J = 7.6, 6.2$  Hz, 3H), 7.52 (d,  $J = 7.5$  Hz, 1H), 7.43 (t,  $J = 8.1, 6.8$  Hz, 1H), 7.06 (t,  $J = 7.9$  Hz, 1H), 7.01 (s, 1H), 6.71 (t,  $J = 6.9$  Hz, 1H), 5.69 (s, 2H).  $^{13}\text{C}\{^1\text{H}\}$  NMR (126 MHz,  $\text{CDCl}_3$ )  $\delta$  167.1, 135.9, 131.2, 129.2, 128.6, 128.1, 126.0, 123.0, 121.9, 120.6, 113.1, 112.7, 105.9. HRMS (ESI-Orbitrap)  $m/z$ : calcd for Chemical Formula:  $\text{C}_{15}\text{H}_{13}\text{N}_2\text{O}^+$   $[\text{M}+\text{H}]^+$  237.1022, found 237.1028.

### N,3-diphenylindolizine-1-carboxamide (1m)

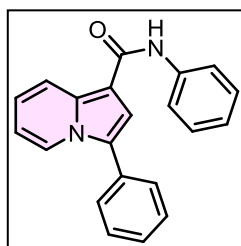

Dark green sticky solid; 1.25g, (43%).  $^1\text{H NMR}$  (500 MHz, Chloroform-*d*)  $\delta$  8.50 (d,  $J = 9.1$  Hz, 1H), 8.29 (d,  $J = 7.1$  Hz, 1H), 7.73 – 7.66 (m, 3H), 7.57 (d,  $J = 7.6$  Hz, 2H), 7.53 (t,  $J = 7.5$  Hz, 2H), 7.44 (t,  $J = 7.3$  Hz, 1H), 7.37 (t,  $J = 7.7$  Hz, 2H), 7.15 – 7.09 (m, 2H), 7.07 (t,  $J = 8.5, 6.9$  Hz, 1H), 6.73 (t,  $J = 6.8$  Hz, 1H). HRMS (ESI-Orbitrap)  $m/z$ : calcd for Chemical Formula:  $\text{C}_{21}\text{H}_{17}\text{N}_2\text{O}^+$   $[\text{M}+\text{H}]^+$  313.1335, found 313.1371.

### N-butyl-3-phenylindolizine-1-carboxamide (1n)

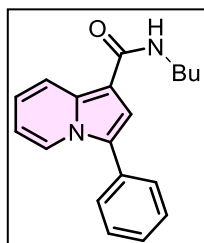

Dark yellow semi solid; 1.25g, (43%).  $^1\text{H NMR}$  (500 MHz, Chloroform-*d*)  $\delta$  8.44 (dt,  $J = 9.1, 1.3$  Hz, 1H), 8.26 (dt,  $J = 7.0, 1.1$  Hz, 1H), 7.58 – 7.52 (m, 2H), 7.55 – 7.48 (m, 2H), 7.42 (tt,  $J = 7.4, 1.0$  Hz, 1H), 7.01 (ddd,  $J = 9.1, 6.5, 1.1$  Hz, 1H), 6.96 (s, 1H), 6.67 (td,  $J = 6.8, 1.4$  Hz, 1H), 5.92 (s, 1H), 3.50 (q,  $J = 7.5, 7.0, 6.0$  Hz, 2H), 1.64 (p,  $J = 7.4$  Hz, 2H), 1.46 (hept,  $J = 8.0, 8.0, 7.5, 7.4, 7.4$  Hz, 2H), 0.99 (t,  $J = 7.4$  Hz, 3H). HRMS (ESI-Orbitrap)  $m/z$ : calcd for Chemical Formula:  $\text{C}_{19}\text{H}_{21}\text{N}_2\text{O}^+$   $[\text{M}+\text{H}]^+$  293.1648, found 293.1641.

### N,N-dimethyl-3-(pyridin-2-yl)indolizine-1-carboxamide (1o).

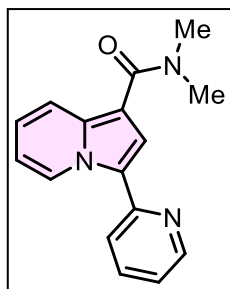

Dark Brown sticky solid; 1.1g, (43%).  $^1\text{H NMR}$  (500 MHz, Chloroform-*d*)  $\delta$  9.94 (dt,  $J = 7.2, 0.9$  Hz, 1H), 8.62 (dq,  $J = 4.1, 0.8$  Hz, 1H), 7.93 (dt,  $J = 9.0, 1.3$  Hz, 1H), 7.68 (td,  $J = 7.7, 7.3, 1.8$  Hz, 1H), 7.63 (dt,  $J = 8.1, 1.2$  Hz, 1H), 7.42 (s, 1H), 7.10 (ddd,  $J = 7.3, 4.9, 1.2$  Hz, 1H), 7.03 (ddd,  $J = 9.0, 6.5, 1.1$  Hz, 1H), 6.77 (td,  $J = 6.9, 1.4$  Hz, 1H), 3.19 (s, 6H).  $^{13}\text{C}\{^1\text{H}\}$  NMR (126 MHz,  $\text{CDCl}_3$ )  $\delta$  167.6, 152.0, 148.4, 136.5, 136.4, 127.0, 122.4, 121.8, 120.9, 120.4, 119.3, 116.1, 112.5, 108.0, 37.7. HRMS (ESI-Orbitrap)  $m/z$ : calcd for Chemical Formula:  $\text{C}_{16}\text{H}_{16}\text{N}_3\text{O}^+$   $[\text{M}+\text{H}]^+$  266.1288, found 266.1291.

### 3-Cyclopropyl-N,N-dimethylindolizine-1-carboxamide (1p).

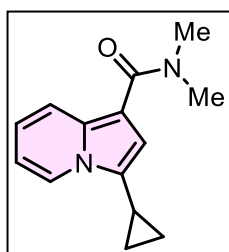

Dark yellow oil; 1.34g, (61%).  $^1\text{H NMR}$  (500 MHz, Chloroform-*d*)  $\delta$  8.11 (dt,  $J = 7.1, 1.1$  Hz, 1H), 7.89 (dt,  $J = 9.1, 1.0$  Hz, 1H), 6.91 (ddd,  $J = 9.0, 6.6, 1.1$  Hz, 1H), 6.71 – 6.65 (m, 2H), 3.16 (s, 6H), 1.83 (hept,  $J = 5.2, 5.2, 4.9, 4.6, 3.5, 3.2$  Hz, 1H), 1.03 – 0.96 (m, 2H), 0.68 – 0.65 (m, 2H).  $^{13}\text{C}\{^1\text{H}\}$  NMR (126 MHz,  $\text{CDCl}_3$ )  $\delta$  168.1, 134.3, 125.9, 122.7, 119.8, 112.5, 111.5, 105.3, 38.0, 22.3, 6.0, 5.4. HRMS (ESI-Orbitrap)  $m/z$ : calcd for Chemical Formula:  $\text{C}_{14}\text{H}_{17}\text{N}_2\text{O}^+$   $[\text{M}+\text{H}]^+$  229.1335, found 229.1329.

### N-methoxy-N-methyl-3-phenylindolizine-1-carboxamide (1q).

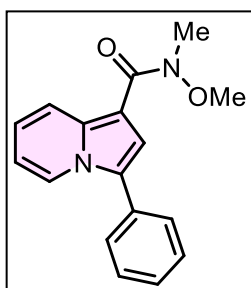

Dark green sticky solid; 1.8g, (66%).  $^1\text{H NMR}$  (500 MHz, Chloroform-*d*)  $\delta$  8.5 (dt,  $J = 9.2, 1.2$  Hz, 1H), 8.3 (dt,  $J = 7.0, 1.2$  Hz, 1H), 7.6 (dd,  $J = 7.1, 1.7$  Hz, 2H), 7.5 (td,  $J = 7.6, 2.2$  Hz, 2H), 7.4 (tt,  $J = 7.3, 1.3$  Hz, 1H), 7.4 (s, 1H), 7.1 (ddd,  $J = 9.2, 6.6, 1.1$  Hz, 1H), 6.7 (td,  $J = 6.9, 1.4$  Hz, 1H), 3.8 (s, 3H), 3.4 (s, 3H).  $^{13}\text{C}\{^1\text{H}\}$  NMR (126 MHz,  $\text{CDCl}_3$ )  $\delta$  166.2, 137.6, 131.6, 129.1, 128.7, 127.9, 125.9, 122.8, 121.8, 121.0, 115.7, 112.7, 104.7, 60.9, 33.5. HRMS (ESI-Orbitrap)  $m/z$ : calcd for Chemical Formula:  $\text{C}_{17}\text{H}_{17}\text{N}_2\text{O}_2^+$   $[\text{M}+\text{H}]^+$  281.1285, found 281.1301.

### N-methyl-N,3-diphenylindolizine-1-carboxamide (1r)

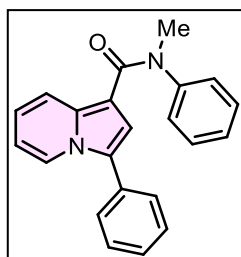

Dark brown sticky solid; 2.2g, (69%).  $^1\text{H NMR}$  (500 MHz, Chloroform-*d*)  $\delta$  8.44 (dt,  $J = 9.1, 1.2$  Hz, 1H), 8.18 (dt,  $J = 7.0, 1.1$  Hz, 1H), 7.42 – 7.31 (m, 5H), 7.32 – 7.21 (m, 5H), 7.00 (ddd,  $J = 9.2, 6.6, 1.1$  Hz, 1H), 6.64 (td,  $J = 6.8, 1.4$  Hz, 1H), 5.83 (s, 1H), 3.54 (s, 3H).  $^{13}\text{C}\{^1\text{H}\}$  NMR (126 MHz,  $\text{CDCl}_3$ )  $\delta$  166.3, 146.0, 137.1, 131.4, 129.3, 128.9, 128.4, 127.6, 127.6, 126.7, 124.8, 122.6, 121.2, 121.0, 115.8, 112.4, 107.0, 38.4.

**HRMS (ESI-Orbitrap) m/z:** calcd for Chemical Formula: C<sub>22</sub>H<sub>19</sub>N<sub>2</sub>O<sup>+</sup> [M+H]<sup>+</sup> 327.1492, found 327.1491.

**N,N-dimethylindolizine-1-carboxamide (1s)**

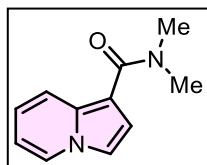

Dark Brown semi-solid; 0.9g, (52%). <sup>1</sup>H NMR (500 MHz, Chloroform-*d*) δ 7.95 – 7.88 (m, 2H), 7.23 (d, *J* = 2.9 Hz, 1H), 6.93 (d, *J* = 3.0 Hz, 1H), 6.92 – 6.85 (m, 1H), 6.60 (t, *J* = 6.7 Hz, 1H), 3.18 (s, 6H). **HRMS (ESI-**

**Orbitrap) m/z:** calcd for Chemical Formula: C<sub>11</sub>H<sub>13</sub>N<sub>2</sub>O<sup>+</sup> [M+H]<sup>+</sup> 189.1022, found 189.1031.

**2.2 Optimization of reaction conditions for C-8 Acyloxylation of Indolizines.**

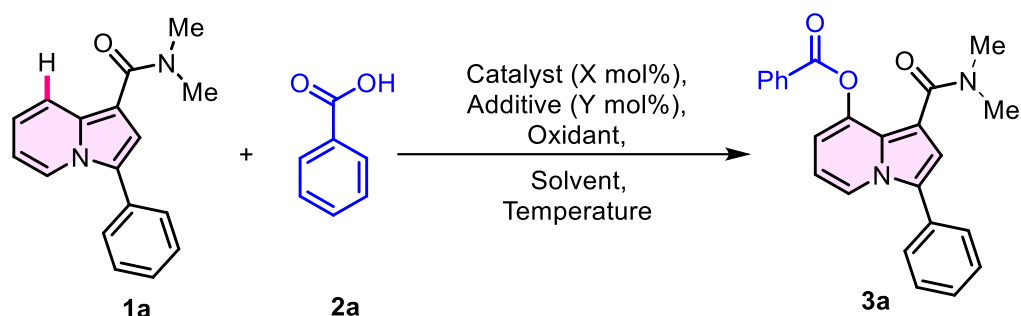

**Scheme-S2:** Optimization of reaction conditions for C-8 Acyloxylation of Indolizines.

The oven dried reaction tube equipped with magnetic stir bar was loaded with X mol% of catalyst and Y mol% of additive as mentioned in the table below. Further, *N,N*-dimethyl-3-phenylindolizine-1-carboxamide (**1a**) (0.2 mmol) and benzoic acid (**2a**) (**1a:2a** as mentioned in the table below) were added to the reaction tube. Next, the oxidant (appropriate equivalents as mentioned in the table below) and solvent (1 mL) were added to the reaction tube and stirred at mentioned temperatures (below table) for 24 hours. After completion, the reaction was cooled to ambient temperature, diluted with ethyl acetate and passed through celite pad. The organic compounds were collected completely, concentrated under reduced pressure and purified by column chromatography on silica gel (230-400 mesh, 1:1 EtOAc/Hexane) to obtain the product **3a**.

**Table S1. Results for the optimisation of reaction conditons:**

| Entry           | Ratio<br>between<br>1a and<br>2a | Catalyst (X Mol%)                                     | Additive (Y<br>Mol%)    | Oxidant<br>(equiv)                                                   | Temp.<br>(°C) | Solvent<br>(1ml) | Isolated<br>Yield<br>3aa<br>(%) |
|-----------------|----------------------------------|-------------------------------------------------------|-------------------------|----------------------------------------------------------------------|---------------|------------------|---------------------------------|
| 1               | 1:2                              | [RhCp*Cl <sub>2</sub> ] <sub>2</sub> (2.5)            | AgSbF <sub>6</sub> (10) | Ag <sub>2</sub> CO <sub>3</sub> (3)                                  | 100           | THF              | 52%                             |
| 2               | 1:2                              | [Cp*IrCl <sub>2</sub> ] <sub>2</sub> (2.5)            | AgSbF <sub>6</sub> (10) | Ag <sub>2</sub> CO <sub>3</sub> (3)                                  | 100           | THF              | Traces                          |
| 3               | 1:2                              | [RuCl <sub>2</sub> -(p-cymene)] <sub>2</sub><br>(2.5) | AgSbF <sub>6</sub> (10) | Ag <sub>2</sub> CO <sub>3</sub> (3)                                  | 100           | THF              | 48%                             |
| 4               | 1:2                              | [RuCl <sub>2</sub> -(p-cymene)] <sub>2</sub><br>(2.5) | AgSbF <sub>6</sub> (10) | Ag <sub>2</sub> CO <sub>3</sub> (3)                                  | 100           | DCE              | 63%                             |
| 5               | 1:2                              | --                                                    | --                      | Ag <sub>2</sub> CO <sub>3</sub> (3)                                  | 100           | DCE              | NR                              |
| 6               | 1:2                              | [RuCl <sub>2</sub> -(p-cymene)] <sub>2</sub><br>(2.5) | AgSbF <sub>6</sub> (10) | Ag <sub>2</sub> CO <sub>3</sub> (3)                                  | 100           | Toluene          | 46%                             |
| 7               | 1:2                              | [RuCl <sub>2</sub> -(p-cymene)] <sub>2</sub><br>(2.5) | AgSbF <sub>6</sub> (10) | Ag <sub>2</sub> CO <sub>3</sub> (3)                                  | 100           | 1,4-<br>Dioxane  | Traces                          |
| 8               | 1:2                              | [RuCl <sub>2</sub> -(p-cymene)] <sub>2</sub><br>(2.5) | AgSbF <sub>6</sub> (10) | Ag <sub>2</sub> CO <sub>3</sub> (3)                                  | 100           | DMF              | Traces                          |
| 9               | 1:2                              | [RuCl <sub>2</sub> -(p-cymene)] <sub>2</sub><br>(2.5) | AgSbF <sub>6</sub> (10) | Ag <sub>2</sub> CO <sub>3</sub> (3)                                  | 100           | NMP              | NR                              |
| 10              | 1:2                              | [RuCl <sub>2</sub> -(p-cymene)] <sub>2</sub><br>(2.5) | AgSbF <sub>6</sub> (10) | Ag <sub>2</sub> CO <sub>3</sub> (3)                                  | 100           | t-AmOH           | 17%                             |
| 11 <sup>a</sup> | 1:2                              | [RuCl <sub>2</sub> -(p-cymene)] <sub>2</sub><br>(2.5) | AgSbF <sub>6</sub> (10) | Ag <sub>2</sub> CO <sub>3</sub> (3)                                  | 100           | TFE              | -                               |
| 12              | 1:2                              | [RuCl <sub>2</sub> -(p-cymene)] <sub>2</sub><br>(2.5) | AgSbF <sub>6</sub> (10) | Ag <sub>2</sub> CO <sub>3</sub> (3)                                  | 100           | MeOH             | NR                              |
| 13              | 1:2                              | [RuCl <sub>2</sub> -(p-cymene)] <sub>2</sub><br>(2.5) | AgSbF <sub>6</sub> (10) | Ag <sub>2</sub> CO <sub>3</sub> (3)                                  | 100           | EtOAc            | 53%                             |
| 14              | 1:2                              | [RuCl <sub>2</sub> -(p-cymene)] <sub>2</sub><br>(2.5) | AgSbF <sub>6</sub> (10) | Ag <sub>2</sub> CO <sub>3</sub> (3)                                  | 100           | HFIP             | NR                              |
| 15              | 1:2                              | [RuCl <sub>2</sub> -(p-cymene)] <sub>2</sub><br>(2.5) | AgSbF <sub>6</sub> (10) | K <sub>2</sub> CO <sub>3</sub> (3)                                   | 100           | DCE              | NR                              |
| 16              | 1:2                              | [RuCl <sub>2</sub> -(p-cymene)] <sub>2</sub><br>(2.5) | AgSbF <sub>6</sub> (10) | (NH <sub>4</sub> ) <sub>2</sub> S <sub>2</sub> O <sub>8</sub><br>(3) | 100           | DCE              | 18%                             |
| 17              | 1:2                              | [RuCl <sub>2</sub> -(p-cymene)] <sub>2</sub><br>(2.5) | AgSbF <sub>6</sub> (10) | Oxone (3)                                                            | 100           | DCE              | NR                              |
| 18              | 1:2                              | [RuCl <sub>2</sub> -(p-cymene)] <sub>2</sub><br>(2.5) | AgSbF <sub>6</sub> (10) | Ag <sub>2</sub> O (3)                                                | 100           | DCE              | 23%                             |
| 19              | 1:2                              | [RuCl <sub>2</sub> -(p-cymene)] <sub>2</sub><br>(2.5) | AgSbF <sub>6</sub> (10) | PhI(OAc) <sub>2</sub><br>(3)                                         | 100           | DCE              | Traces                          |
| 20              | 1:2                              | [RuCl <sub>2</sub> -(p-cymene)] <sub>2</sub><br>(2.5) | AgSbF <sub>6</sub> (10) | AgF (3)                                                              | 100           | DCE              | 61%                             |
| 21              | 1:2                              | [RuCl <sub>2</sub> -(p-cymene)] <sub>2</sub><br>(2.5) | AgSbF <sub>6</sub> (10) | Cu(OAc) <sub>2</sub><br>(3)                                          | 100           | DCE              | NR                              |
| 22              | 1:2                              | [RuCl <sub>2</sub> -(p-cymene)] <sub>2</sub><br>(2.5) | AgSbF <sub>6</sub> (10) | MnO <sub>2</sub> (3)                                                 | 100           | DCE              | NR                              |
| 23              | 1:2                              | [RuCl <sub>2</sub> -(p-cymene)] <sub>2</sub><br>(2.5) | AgOTf (10)              | Ag <sub>2</sub> CO <sub>3</sub> (3)                                  | 100           | DCE              | 37%                             |
| 24              | 1:2                              | [RuCl <sub>2</sub> -(p-cymene)] <sub>2</sub><br>(2.5) | KPF <sub>6</sub> (10)   | Ag <sub>2</sub> CO <sub>3</sub> (3)                                  | 100           | DCE              | 25%                             |
| 25              | 1:2                              | [RuCl <sub>2</sub> -(p-cymene)] <sub>2</sub><br>(2.5) | AgBF <sub>4</sub> (10)  | Ag <sub>2</sub> CO <sub>3</sub> (3)                                  | 100           | DCE              | 7%                              |

|    |     |                                                       |                         |                                     |     |     |     |
|----|-----|-------------------------------------------------------|-------------------------|-------------------------------------|-----|-----|-----|
| 26 | 1:2 | [RuCl <sub>2</sub> -(p-cymene)] <sub>2</sub><br>(2.5) | AgOAc (10)              | Ag <sub>2</sub> CO <sub>3</sub> (3) | 100 | DCE | 24% |
| 27 | 1:2 | [RuCl <sub>2</sub> -(p-cymene)] <sub>2</sub><br>(1)   | AgSbF <sub>6</sub> (4)  | Ag <sub>2</sub> CO <sub>3</sub> (3) | 100 | DCE | 33% |
| 28 | 1:3 | [RuCl <sub>2</sub> -(p-cymene)] <sub>2</sub><br>(2.5) | AgSbF <sub>6</sub> (10) | Ag <sub>2</sub> CO <sub>3</sub> (3) | 100 | DCE | 86% |
| 29 | 1:3 | [RuCl <sub>2</sub> -(p-cymene)] <sub>2</sub><br>(2.5) | AgSbF <sub>6</sub> (10) | Ag <sub>2</sub> CO <sub>3</sub> (2) | 100 | DCE | 82% |
| 30 | 1:3 | [RuCl <sub>2</sub> -(p-cymene)] <sub>2</sub><br>(2.5) | AgSbF <sub>6</sub> (10) | Ag <sub>2</sub> CO <sub>3</sub> (1) | 100 | DCE | 27% |
| 31 | 1:3 | [RuCl <sub>2</sub> -(p-cymene)] <sub>2</sub><br>(2.5) | AgSbF <sub>6</sub> (10) | Ag <sub>2</sub> CO <sub>3</sub> (3) | 25  | DCE | NR  |
| 32 | 1:3 | [RuCl <sub>2</sub> -(p-cymene)] <sub>2</sub><br>(2.5) | AgSbF <sub>6</sub> (10) | Ag <sub>2</sub> CO <sub>3</sub> (3) | 70  | DCE | 21% |

NR= No Reaction,

<sup>a</sup>Neither product nor **1a** was observed.

### 2.3 General Procedure for the synthesis of C-8 Acyloxyated Products of Indolizines and their spectral characterization data.

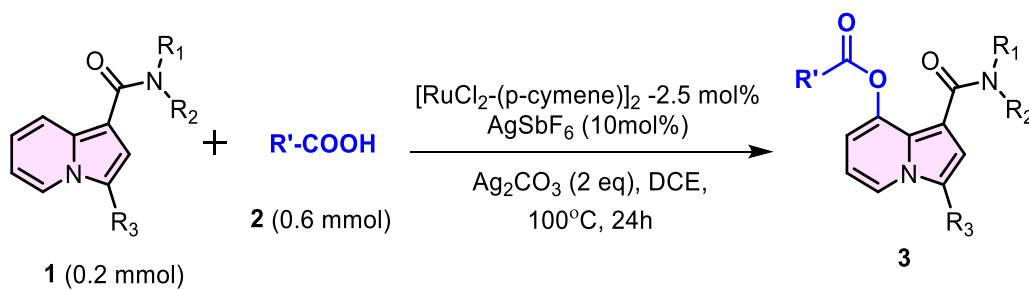

**Scheme-S3:** Synthetic scheme for regioselective C-8 acyloxylation of Indolizines

The oven dried reaction tube equipped with magnetic stir bar was loaded with Ru[(p-cymene)Cl<sub>2</sub>]<sub>2</sub> (3 mg, 2.5 mol%), AgSbF<sub>6</sub> (7 mg, 10 mol%), corresponding indolizines (**1**) (0.2 mmol) and carboxylic acid (**2**) (0.6 mmol). Further, Ag<sub>2</sub>CO<sub>3</sub> (110 mg, 2 equiv) and DCE (1 mL) were added to the reaction tube. The reaction mixture was stirred 100 °C for 24 hours. After completion, the reaction was cooled to ambient temperature, diluted with ethyl acetate and passed through celite pad. The organic compounds were collected completely, concentrated under reduced pressure and purified by column chromatography on silica gel (230-400 mesh, 1:1 EtOAc/Hexane) to obtain the corresponding acyloxyated product **3**.

### 1-(Dimethylcarbamoyl)-3-phenylindolizin-8-yl benzoate (3aa).

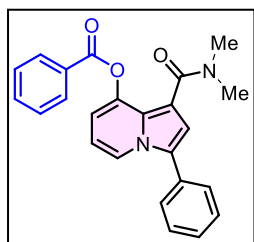

Dark green semi-solid; 63mg, (84%).  $^1\text{H NMR}$  (500 MHz,  $\text{CDCl}_3$ )  $\delta$  8.27 (d,  $J = 7.8$  Hz, 2H), 8.17 (d,  $J = 7.1$  Hz, 1H), 7.69 (t,  $J = 7.4$  Hz, 1H), 7.58 (dt,  $J = 8.1$ , 3.7 Hz, 4H), 7.52 (t,  $J = 7.5$  Hz, 2H), 7.42 (t,  $J = 7.3$  Hz, 1H), 6.85 (s, 1H), 6.76 (d,  $J = 7.2$  Hz, 1H), 6.61 (t,  $J = 7.1$  Hz, 1H), 2.88 (s, 3H), 2.57 (s, 3H).  $^{13}\text{C}\{^1\text{H}\}$  NMR (125 MHz,  $\text{CDCl}_3$ )  $\delta$  167.8, 164.6, 142.2, 133.9, 131.5, 130.4, 129.1, 128.8, 128.7, 128.6, 128.0, 126.7, 125.1, 120.6, 113.5, 110.9, 110.5, 108.8, 39.3, 34.5. IR (ATR-FTIR)  $\nu$   $\text{cm}^{-1}$  2930, 2870, 2421, 2417, 1790, 1673, 1622, 1504, 1486, 1433, 1292, 1288, 1170, 1064, 1045, 1015. HRMS (ESI-Orbitrap)  $m/z$ : calcd for Chemical Formula:  $\text{C}_{24}\text{H}_{21}\text{N}_2\text{O}_3^+$   $[\text{M}+\text{H}]^+$  385.1547, found 385.1585.

### 1-(dimethylcarbamoyl)-3-(p-tolyl) indolizin-8-yl benzoate (3ba).

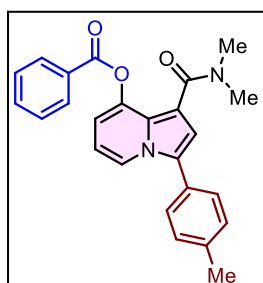

Light brown semi-solid; 42mg, (53%).  $^1\text{H NMR}$  (500 MHz, Chloroform- $d$ )  $\delta$  8.26 (d,  $J = 7.3$  Hz, 2H), 8.12 (d,  $J = 7.1$  Hz, 1H), 7.67 (t,  $J = 7.4$  Hz, 1H), 7.56 (t,  $J = 7.6$  Hz, 2H), 7.45 (d,  $J = 7.8$  Hz, 2H), 7.32 (d,  $J = 7.8$  Hz, 2H), 6.82 (s, 1H), 6.74 (d,  $J = 7.2$  Hz, 1H), 6.59 (t,  $J = 7.2$  Hz, 1H), 2.88 (s, 3H), 2.56 (s, 3H), 2.44 (s, 3H).  $^{13}\text{C}\{^1\text{H}\}$  NMR (126 MHz,  $\text{CDCl}_3$ )  $\delta$  167.8, 164.6, 142.1, 138.0, 133.9, 130.4, 129.8, 128.7, 128.5, 128.4, 126.8, 124.9, 120.7, 113.3, 110.7, 110.4, 39.3, 34.6, 21.3. IR (ATR-FTIR)  $\nu$   $\text{cm}^{-1}$  2921, 2876, 2852, 2411, 2348, 1740, 1596, 1555, 1451, 1406, 1254, 1225, 1169, 1112, 1053, 1015. HRMS (ESI-Orbitrap)  $m/z$ : calcd for Chemical Formula:  $\text{C}_{25}\text{H}_{23}\text{N}_2\text{O}_3^+$   $[\text{M}+\text{H}]^+$  399.1703, found 399.1727.

### 1-(Dimethylcarbamoyl)-3-(4-fluorophenyl) indolizin-8-yl benzoate (3ca).

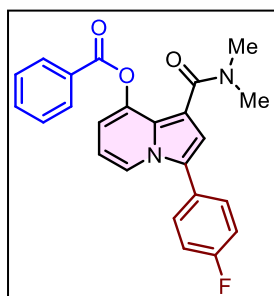

Dark green sticky solid; 48mg, (60%).  $^1\text{H NMR}$  (500 MHz,  $\text{CDCl}_3$ )  $\delta$  8.27 (d,  $J = 7.8$  Hz, 1H), 8.10 (d,  $J = 7.8$  Hz, 1H), 8.04 (d,  $J = 7.1$  Hz, 1H), 7.68 (t,  $J = 7.4$  Hz, 1H), 7.61 – 7.55 (m, 2H), 7.55 – 7.50 (m, 2H), 7.47 (t,  $J = 7.7$  Hz, 1H), 7.21 (t,  $J = 8.4$  Hz, 2H), 6.83 (s, 1H), 6.76 (d,  $J = 7.2$  Hz, 1H), 6.61 (t,  $J = 7.1$  Hz, 1H), 2.88 (s, 3H), 2.57 (s, 3H).  $^{13}\text{C}\{^1\text{H}\}$  NMR (126 MHz,  $\text{CDCl}_3$ )  $\delta$  168.0, 164.6, 162.4 (d,  $^1J_{\text{C-F}} = 248.2$  Hz), 142.1, 134.0, 133.4, 130.5 (d,  $^3J_{\text{C-F}} = 8.3$  Hz) 130.4, 130.1, 128.7, 128.4, 127.4 (d,  $^4J_{\text{C-F}} = 3.5$  Hz), 125.6, 125.0, 120.4, 116.2 (d,  $^2J_{\text{C-F}} = 21.6$  Hz), 113.6, 111.0, 110.7, 39.4, 34.6.  $^{19}\text{F NMR}$  (471 MHz,  $\text{CDCl}_3$ )  $\delta$  -113.1. IR (ATR-FTIR)  $\nu$   $\text{cm}^{-1}$  2931, 2873, 2422, 2420, 1791, 1671, 1623, 1501, 1487, 1430, 1293, 1285, 1171, 1060, 1045. HRMS (ESI-Orbitrap)  $m/z$ : calcd for Chemical Formula:  $\text{C}_{24}\text{H}_{20}\text{FN}_2\text{O}_3^+$   $[\text{M}+\text{H}]^+$  403.1452, found 403.1463.

### 1-(Dimethylcarbamoyl)-3-(4-(trifluoromethyl)phenyl) indolizin-8-yl benzoate (3da).

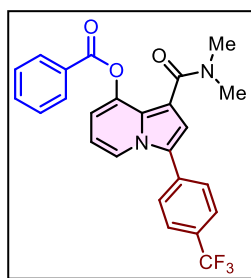

Light green sticky solid; 43mg, (49%).  $^1\text{H NMR}$  (500 MHz,  $\text{CDCl}_3$ )  $\delta$  8.26 (d,  $J = 7.8$  Hz, 2H), 8.17 (d,  $J = 7.2$  Hz, 1H), 7.77 (d,  $J = 8.1$  Hz, 2H), 7.69 (t,  $J = 7.9$ , 7.5 Hz, 3H), 7.58 (t,  $J = 7.9$ , 7.5 Hz, 2H), 6.92 (s, 1H), 6.81 (d,  $J = 7.2$  Hz, 1H), 6.67 (t,  $J = 7.2$  Hz, 1H), 2.88 (s, 3H), 2.56 (s, 3H).  $^{13}\text{C}\{^1\text{H}\}$  NMR (126 MHz,  $\text{CDCl}_3$ )  $\delta$  167.5, 164.5, 142.3, 135.0, 134.0, 130.4, 129.5, 128.7, 128.6, 128.4, 126.2, 126.2, 126.2, 126.1 (q,  $^3J_{\text{C-F}} = 4.0$  Hz), 125.9, 125.1, 120.3, 114.3, 111.6, 111.2, 109.3, 39.3, 34.5.  $^{19}\text{F NMR}$  (470 MHz,  $\text{CDCl}_3$ )  $\delta$  -62.6. IR (ATR-FTIR)  $\nu$   $\text{cm}^{-1}$  2943, 2873, 2436, 1667, 1654, 1531, 1449, 1427, 1263, 1198, 1174, 1062, 1045, 971. HRMS (ESI-Orbitrap)  $m/z$ : calcd for Chemical Formula:  $\text{C}_{25}\text{H}_{20}\text{F}_3\text{N}_2\text{O}_3^+$   $[\text{M}+\text{H}]^+$  453.1421, found 453.1463.

### 1-(Dimethylcarbamoyl)-3-(4-nitrophenyl)indolizin-8-yl benzoate (3ea).

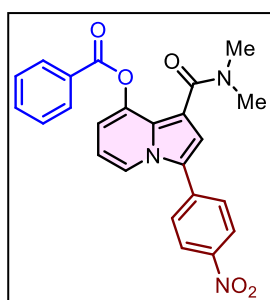

Reddish solid; 46mg, (53%). M.P: 127-129°C;  $^1\text{H NMR}$  (500 MHz,  $\text{CDCl}_3$ )  $\delta$  8.38 (d,  $J = 8.3$  Hz, 2H), 8.26 (d,  $J = 8.4$  Hz, 3H), 7.76 (d,  $J = 8.4$  Hz, 2H), 7.70 (t,  $J = 7.4$  Hz, 1H), 7.58 (t,  $J = 7.6$  Hz, 2H), 6.99 (s, 1H), 6.86 (d,  $J = 7.3$  Hz, 1H), 6.75 (t,  $J = 7.2$  Hz, 1H), 2.87 (s, 3H), 2.56 (s, 3H).  $^{13}\text{C}\{^1\text{H}\}$  NMR (125 MHz,  $\text{CDCl}_3$ )  $\delta$  167.1, 164.5, 146.5, 142.4, 137.9, 134.1, 130.4, 128.8, 128.5, 128.0, 126.8, 124.7, 124.4, 120.4, 115.2, 112.4, 111.9, 110.2, 39.3, 34.5. IR (ATR-FTIR)  $\nu$   $\text{cm}^{-1}$  2962, 2923, 2855, 2348, 2312, 1741, 1633, 1590, 1553, 1515, 1454, 1379, 1342, 1254, 1229, 1173, 1082, 1011. HRMS (ESI-Orbitrap)  $m/z$ : calcd for Chemical Formula:  $\text{C}_{24}\text{H}_{20}\text{N}_3\text{O}_5^+$   $[\text{M}+\text{H}]^+$  430.1397, found 430.1402.

### 3-(3-Chlorophenyl)-1-(dimethylcarbamoyl) indolizin-8-yl benzoate (3fa).

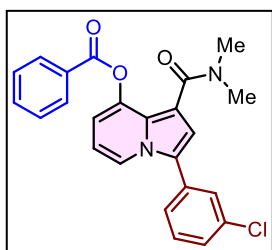

Light green sticky solid; 50mg, (60%).  $^1\text{H NMR}$  (500 MHz,  $\text{CDCl}_3$ )  $\delta$  8.25 (dd,  $J = 7.1$ , 0.9 Hz, 2H), 8.13 (d,  $J = 7.0$  Hz, 1H), 7.67 (t,  $J = 7.5$  Hz, 1H), 7.59 – 7.54 (m, 3H), 7.46 – 7.41 (m, 2H), 7.40 – 7.36 (m, 1H), 6.85 (s, 1H), 6.77 (d,  $J = 7.2$  Hz, 1H), 6.64 (t,  $J = 7.2$  Hz, 1H), 2.86 (s, 3H), 2.56 (s, 3H).  $^{13}\text{C}\{^1\text{H}\}$  NMR (125 MHz,  $\text{CDCl}_3$ )  $\delta$  167.5, 164.5, 142.3, 135.0, 133.9, 133.2, 130.4, 128.7, 128.7, 128.3, 128.0, 126.5, 125.5, 125.1, 120.4, 113.9, 111.3, 111.0, 109.2, 39.2, 34.5. IR (ATR-FTIR)  $\nu$   $\text{cm}^{-1}$  2926, 2855, 2313, 2168, 2117, 1740, 1713, 1595, 1554, 1510, 1455, 1412, 1259, 1228, 1168, 1109, 1058, 1018. HRMS (ESI-Orbitrap)  $m/z$ : calcd for Chemical Formula:  $\text{C}_{24}\text{H}_{20}\text{ClN}_2\text{O}_3^+$   $[\text{M}+\text{H}]^+$  419.1157, found 419.1195.

### 1-(Dimethylcarbamoyl)-3-(naphthalen-1-yl)indolizin-8-yl benzoate (3ga).

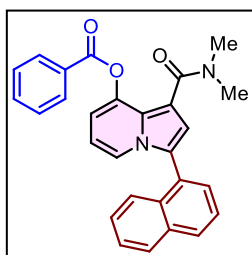

Light green semi-solid; 23mg, (27%).  $^1\text{H NMR}$  (500 MHz,  $\text{CDCl}_3$ )  $\delta$  8.31 (d,  $J = 7.7$  Hz, 2H), 7.98 (t,  $J = 8.4$  Hz, 2H), 7.69 (t,  $J = 7.4$  Hz, 1H), 7.66 – 7.52 (m, 6H), 7.51 – 7.43 (m, 2H), 6.96 (s, 1H), 6.78 (d,  $J = 7.2$  Hz, 1H), 6.50 (t,  $J = 7.2$  Hz, 1H), 2.96 (s, 3H), 2.62 (s, 3H).  $^{13}\text{C}\{^1\text{H}\}$  NMR (126 MHz,  $\text{CDCl}_3$ )  $\delta$  167.9, 164.6, 142.1, 133.9, 133.9, 132.2, 130.5, 129.4, 129.2, 128.9, 128.7, 128.6, 126.9, 126.4, 125.6, 125.6, 124.9, 124.4, 121.4, 114.9, 110.9, 110.2, 108.5, 39.4, 34.6. **IR (ATR-FTIR)**  $\nu$   $\text{cm}^{-1}$  2801, 2379, 2311, 1737, 1684, 1598, 1550, 1513, 1488, 1449, 1396, 1368, 1252, 1226, 1166, 1133, 1109, 1050, 1017. **HRMS (ESI-Orbitrap)**  $m/z$ : calcd for Chemical Formula:  $\text{C}_{28}\text{H}_{23}\text{N}_2\text{O}_3^+ [\text{M}+\text{H}]^+$  435.1703, found 435.1711.

### Ethyl 8-(benzoyloxy)-1-(dimethylcarbamoyl)indolizine-3-carboxylate (3ha).

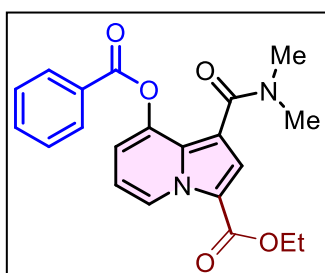

Light green solid; 54mg, (72%). M.P: 118-120°C;  $^1\text{H NMR}$  (500 MHz,  $\text{CDCl}_3$ )  $\delta$  9.41 (d,  $J = 7.1$  Hz, 1H), 8.24 (d,  $J = 7.8$  Hz, 2H), 7.69 (t,  $J = 7.5$  Hz, 1H), 7.57 (t,  $J = 7.7$  Hz, 2H), 7.51 (s, 1H), 7.05 (d,  $J = 7.4$  Hz, 1H), 6.93 (t,  $J = 7.2$  Hz, 1H), 4.40 (q,  $J = 7.1$  Hz, 2H), 2.82 (s, 3H), 2.55 (s, 3H), 1.42 (t,  $J = 7.1$  Hz, 3H).  $^{13}\text{C}\{^1\text{H}\}$  NMR (125 MHz,  $\text{CDCl}_3$ )  $\delta$  166.6, 164.4, 161.1, 141.5, 134.1, 130.5, 130.5, 129.5, 129.3, 128.7, 128.4, 125.2, 120.5, 115.2, 115.0, 112.7, 109.7, 60.3, 39.2, 34.5, 14.5. **IR (ATR-FTIR)**  $\nu$   $\text{cm}^{-1}$  2902, 2810, 2435, 2240, 1734, 1637, 1611, 1540, 1453, 1390, 1142, 1129, 1046, 1010. **HRMS (ESI-Orbitrap)**  $m/z$ : calcd for Chemical Formula:  $\text{C}_{21}\text{H}_{21}\text{N}_2\text{O}_5^+ [\text{M}+\text{H}]^+$  381.1445, found 381.1469.

### 3-benzoyl-1-(dimethylcarbamoyl)indolizine-8-yl benzoate (3ia).

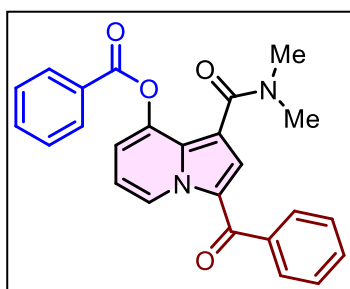

Light brown powder; 46mg(56%). M.P: 149-150°C;  $^1\text{H NMR}$  (500 MHz,  $\text{Chloroform-}d$ )  $\delta$  9.89 (dd,  $J = 7.0, 0.9$  Hz, 1H), 8.25 (dd,  $J = 7.2, 0.9$  Hz, 2H), 7.85 – 7.81 (m, 2H), 7.70 (tt,  $J = 7.4, 1.4$  Hz, 1H), 7.58 (t,  $J = 7.7$  Hz, 3H), 7.51 (t,  $J = 7.5$  Hz, 2H), 7.34 (s, 1H), 7.22 (dd,  $J = 7.5, 0.9$  Hz, 1H), 7.06 (t,  $J = 7.3$  Hz, 1H), 2.80 (s, 3H), 2.53 (s, 3H).  $^{13}\text{C}\{^1\text{H}\}$  NMR (126 MHz,  $\text{CDCl}_3$ )  $\delta$  185.2, 166.3, 164.4,

141.4, 140.0, 134.2, 131.5, 130.6, 130.4, 129.0, 128.8, 128.4, 128.3, 126.5, 125.0, 122.9, 117.7, 113.9, 110.7, 39.2, 34.5. **IR (ATR-FTIR)**  $\nu$   $\text{cm}^{-1}$  2942, 2866, 2834, 2420, 2333, 1735, 1591, 1565, 1432, 1401, 1221, 1180, 1112, 1073, 1015. **HRMS (ESI-Orbitrap)**  $m/z$ : calcd for Chemical Formula:  $\text{C}_{25}\text{H}_{21}\text{N}_2\text{O}_4^+ [\text{M}+\text{H}]^+$  413.1496, found 413.1520.

### 1-(Diethylcarbamoyl)-3-phenylindolizine-8-yl benzoate (3ja).

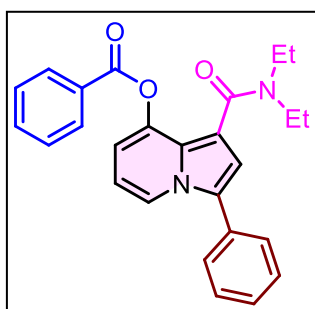

Dark green sticky solid; 62mg, (76%). **<sup>1</sup>H NMR (500 MHz, CDCl<sub>3</sub>)** δ 8.28 (d, *J* = 7.8 Hz, 2H), 8.16 (d, *J* = 7.0 Hz, 1H), 7.66 (t, *J* = 7.4 Hz, 1H), 7.57 (d, *J* = 8.1 Hz, 3H), 7.56 – 7.49 (m, 3H), 7.42 (t, *J* = 7.3 Hz, 1H), 6.83 (s, 1H), 6.73 (d, *J* = 7.2 Hz, 1H), 6.60 (t, *J* = 7.1 Hz, 1H), 3.35 – 3.29 (m, 2H), 3.26 – 3.16 (m, 2H), 1.04 (t, *J* = 7.5 Hz, 3H), 0.87 (t, *J* = 11.6 Hz, 3H). **<sup>13</sup>C{<sup>1</sup>H} NMR (126 MHz, CDCl<sub>3</sub>)** δ 167.2, 164.8, 142.3, 133.8, 131.5, 130.6, 129.1, 129.0, 128.6, 127.9, 126.4, 125.5, 120.5, 113.3, 110.8, 110.6, 110.5, 109.4, 46.5, 43.6, 14.3, 12.8. **IR (ATR-FTIR)** *v* cm<sup>-1</sup> 2970, 2820, 2461, 1750, 1576, 1463, 1282, 1276, 1235, 1093, 1045. **HRMS (ESI-Orbitrap) m/z**: calcd for Chemical Formula: C<sub>26</sub>H<sub>25</sub>N<sub>2</sub>O<sub>3</sub><sup>+</sup> [M+H]<sup>+</sup> 413.1860, found 413.1901.

### 1-(Morpholine-4-carbonyl)-3-phenylindolizin-8-yl benzoate (3ka).

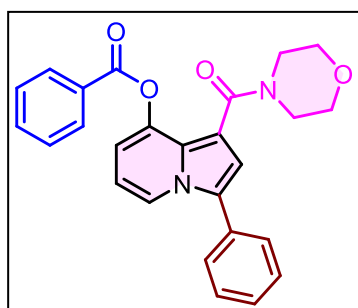

Dark green semi-solid; 49mg, (58%). **<sup>1</sup>H NMR (500 MHz, CDCl<sub>3</sub>)** δ 8.33 – 8.27 (m, 2H), 8.17 (d, *J* = 7.1 Hz, 1H), 7.69 (t, *J* = 7.5 Hz, 1H), 7.57 (dd, *J* = 13.3, 5.5 Hz, 4H), 7.53 (t, *J* = 7.5 Hz, 2H), 7.43 (t, *J* = 7.2 Hz, 1H), 6.82 (s, 1H), 6.77 (d, *J* = 7.1 Hz, 1H), 6.64 (d, *J* = 7.2 Hz, 1H), 3.51 – 3.28 (m, 8H). **<sup>13</sup>C{<sup>1</sup>H} NMR (126 MHz, CDCl<sub>3</sub>)** δ 166.4, 164.7, 142.2, 134.0, 131.3, 130.6, 129.2, 128.9, 128.7, 128.6, 128.1, 126.8, 125.9, 121.4, 120.8, 113.4, 111.4, 110.8, 107.8, 66.6, 48.2, 42.1. **IR (ATR-FTIR)** *v* cm<sup>-1</sup> 2957, 2857, 2379, 2311, 1739, 1599, 1553, 1514, 1445, 1372, 1341, 1298, 1255, 1228, 1171, 1055, 1013. **HRMS (ESI-Orbitrap) m/z**: calcd for Chemical Formula: C<sub>26</sub>H<sub>23</sub>N<sub>2</sub>O<sub>4</sub><sup>+</sup> [M+H]<sup>+</sup> 427.1652, found 427.1696.

### 1-(Dimethylcarbamoyl)-3-phenylindolizin-8-yl 4-methyl benzoate (3ab).

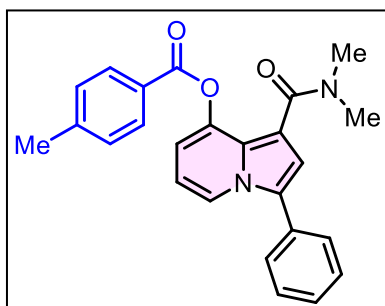

Light green solid; 62mg, (78%). M.P: 128-129°C; **<sup>1</sup>H NMR (500 MHz, CDCl<sub>3</sub>)** δ 8.15 (d, *J* = 7.6 Hz, 3H), 7.57 (d, *J* = 7.6 Hz, 2H), 7.52 (t, *J* = 7.6 Hz, 2H), 7.42 (t, *J* = 7.4 Hz, 1H), 7.36 (d, *J* = 7.9 Hz, 2H), 6.85 (s, 1H), 6.76 (d, *J* = 7.2 Hz, 1H), 6.61 (t, *J* = 7.2 Hz, 1H), 2.75 (s, 6H), 2.48 (s, 3H). **<sup>13</sup>C{<sup>1</sup>H} NMR (125 MHz, CDCl<sub>3</sub>)** δ 168.0, 164.6, 144.8, 142.3, 131.5, 130.5, 129.4, 129.1, 128.6, 128.0, 126.7, 126.1,

120.5, 113.6, 111.0, 110.6, 21.8. **IR (ATR-FTIR)** *v* cm<sup>-1</sup> 2961, 2922, 2856, 2348, 2314, 2219, 1738, 1622, 1557, 1516, 1453, 1376, 1344, 1254, 1227, 1179, 1078, 1014. **HRMS (ESI-Orbitrap) m/z**: calcd for Chemical Formula: C<sub>25</sub>H<sub>23</sub>N<sub>2</sub>O<sub>3</sub><sup>+</sup> [M+H]<sup>+</sup> 399.1703, found 399.1740.

### 1-(Dimethylcarbamoyl)-3-phenylindolizin-8-yl [1,1'-biphenyl]-4-carboxylate (3ac).

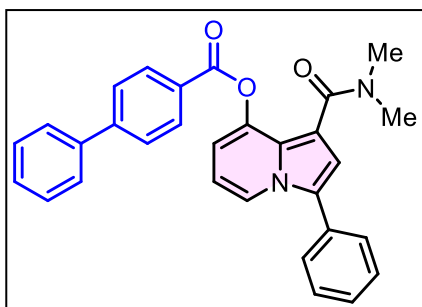

Light green solid; 71mg, (77%). M.P: 117-119°C;  $^1\text{H NMR}$  (500 MHz,  $\text{CDCl}_3$ )  $\delta$  8.34 (d,  $J = 8.0$  Hz, 2H), 8.18 (d,  $J = 7.1$  Hz, 1H), 7.81 (d,  $J = 7.9$  Hz, 2H), 7.71 (d,  $J = 7.6$  Hz, 2H), 7.58 (d,  $J = 7.7$  Hz, 2H), 7.53 (t,  $J = 7.5$  Hz, 4H), 7.45 (dd,  $J = 13.6, 7.1$  Hz, 2H), 6.87 (s, 1H), 6.79 (d,  $J = 7.1$  Hz, 1H), 6.62 (t,  $J = 7.1$  Hz, 1H), 2.92 (s, 3H), 2.64 (s, 3H).  $^{13}\text{C}\{^1\text{H}\}$  NMR (125 MHz,  $\text{CDCl}_3$ )  $\delta$  167.9, 164.5, 146.5, 142.2, 139.8, 131.5, 131.0, 129.2, 129.1, 128.6, 128.4, 128.0, 127.5, 127.4, 127.3, 126.7, 125.1, 120.6, 113.5, 110.9, 110.6, 108.8, 39.4, 34.7. IR (ATR-FTIR)  $\nu$   $\text{cm}^{-1}$  2800, 2360, 2315, 1550, 1513, 1498, 1452, 1400, 1379, 1255, 1276, 1165, 1132, 1100, 1051, 1016. HRMS (ESI-Orbitrap)  $m/z$ : calcd for Chemical Formula:  $\text{C}_{30}\text{H}_{25}\text{N}_2\text{O}_3^+ [\text{M}+\text{H}]^+$  461.1860, found 461.1902.

### 1-(Dimethylcarbamoyl)-3-phenylindolizin-8-yl 4-(benzyloxy) benzoate (3ad).

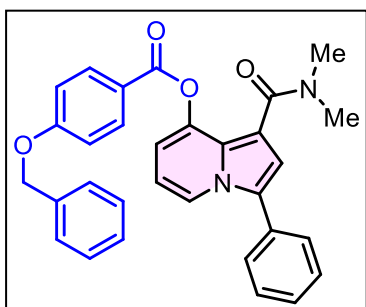

Light green solid; 53mg, (53%). M.P: 141-143°C;  $^1\text{H NMR}$  (500 MHz,  $\text{CDCl}_3$ )  $\delta$  8.22 (d,  $J = 8.5$  Hz, 2H), 8.15 (d,  $J = 7.1$  Hz, 1H), 7.57 (d,  $J = 7.6$  Hz, 2H), 7.52 (t,  $J = 7.6$  Hz, 2H), 7.48 (d,  $J = 7.5$  Hz, 2H), 7.46 – 7.41 (m, 3H), 7.41 – 7.36 (m, 1H), 7.12 (d,  $J = 8.5$  Hz, 2H), 6.85 (s, 1H), 6.74 (d,  $J = 7.2$  Hz, 1H), 6.60 (t,  $J = 7.2$  Hz, 1H), 5.20 (s, 2H), 2.86 (s, 3H), 2.59 (s, 3H).  $^{13}\text{C}\{^1\text{H}\}$  NMR (125 MHz,  $\text{CDCl}_3$ )  $\delta$  167.9, 164.2, 163.2, 142.2, 136.1, 132.6, 131.5, 129.1, 128.7, 128.5, 128.3, 127.9, 127.6, 126.7, 125.2, 121.3, 120.4, 114.8, 113.4, 110.8, 110.6, 108.8, 70.2, 39.3, 34.6. IR (ATR-FTIR)  $\nu$   $\text{cm}^{-1}$  3062, 2961, 2924, 2854, 2348, 2312, 2221, 1740, 1624, 1553, 1515, 1453, 1378, 1342, 1256, 1227, 1173, 1079, 1014. HRMS (ESI-Orbitrap)  $m/z$ : calcd for Chemical Formula:  $\text{C}_{31}\text{H}_{27}\text{N}_2\text{O}_4^+ [\text{M}+\text{H}]^+$  491.1965, found 491.2003.

### 1-(Dimethylcarbamoyl)-3-phenylindolizin-8-yl 4-fluoro benzoate (3ae).

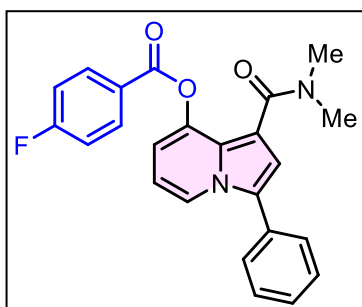

Reddish brown sticky solid; 52mg, (65%).  $^1\text{H NMR}$  (500 MHz,  $\text{CDCl}_3$ )  $\delta$  8.30 (tq,  $J = 5.6, 5.4, 3.4, 2.6, 2.1$  Hz, 2H), 8.16 (d,  $J = 7.0$  Hz, 1H), 7.57 (dd,  $J = 7.0, 1.3$  Hz, 2H), 7.52 (t,  $J = 7.7$  Hz, 2H), 7.42 (t,  $J = 7.3$  Hz, 1H), 7.24 (tt,  $J = 8.6, 2.8, 2.0$  Hz, 2H), 6.84 (s, 1H), 6.75 (d,  $J = 7.1$  Hz, 1H), 6.60 (t,  $J = 7.2$  Hz, 1H), 2.89 (s, 3H), 2.62 (s, 3H).  $^{13}\text{C}\{^1\text{H}\}$  NMR (126 MHz,  $\text{CDCl}_3$ )  $\delta$  167.7, 166.32 (d,  $^1J_{\text{C-F}} = 255.4$  Hz), 163.6, 142.1, 133.11 (d,  $^3J_{\text{C-F}} = 9.6$  Hz), 131.4, 129.1, 128.6, 128.0, 126.7, 125.18 (d,  $^4J_{\text{C-F}} = 2.9$  Hz), 125.1, 120.6, 115.88 (d,  $^2J_{\text{C-F}} = 22.1$  Hz), 113.5, 110.9, 110.5, 108.8, 39.3, 34.6.  $^{19}\text{F NMR}$  (470 MHz,  $\text{CDCl}_3$ )

$\delta$  -103.8. IR (ATR-FTIR)  $\nu$   $\text{cm}^{-1}$  2940, 2925, 1875, 1587, 1493, 1365, 1350, 1112. HRMS (ESI-Orbitrap)  $m/z$ : calcd for Chemical Formula:  $\text{C}_{24}\text{H}_{20}\text{FN}_2\text{O}_3^+$   $[\text{M}+\text{H}]^+$  403.1452, found 403.1453.

### 1-(Dimethylcarbamoyl)-3-phenylindolizin-8-yl 4-chloro benzoate (3af).

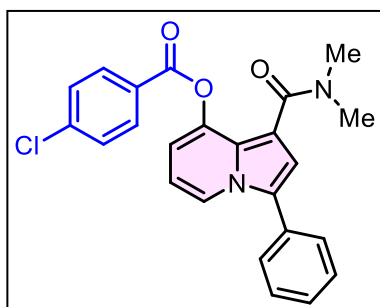

Light green semi-solid; 64mg, (77%).  $^1\text{H}$  NMR (500 MHz,  $\text{CDCl}_3$ )  $\delta$  8.21 (d,  $J = 8.2$  Hz, 2H), 8.17 (d,  $J = 7.1$  Hz, 1H), 7.56 (t,  $J = 8.7$  Hz, 5H), 7.52 (d,  $J = 7.5$  Hz, 1H), 7.43 (t,  $J = 7.2$  Hz, 1H), 6.85 (s, 1H), 6.75 (d,  $J = 7.1$  Hz, 1H), 6.61 (t,  $J = 7.2$  Hz, 1H), 2.90 (s, 3H), 2.64 (s, 3H).  $^{13}\text{C}\{^1\text{H}\}$  NMR (125 MHz,  $\text{CDCl}_3$ )  $\delta$  167.7, 163.8, 142.0,

140.4, 131.8, 131.4, 129.2, 129.0, 128.6, 128.1, 127.4, 126.7, 125.1, 120.7, 113.5, 110.9, 110.5, 108.7, 39.4, 34.7. IR (ATR-FTIR)  $\nu$   $\text{cm}^{-1}$  2961, 2954, 2356, 2333, 1746, 1645, 1550, 1521, 1446, 1377, 1341, 1259, 1220, 1177, 1059, 1015. HRMS (ESI-Orbitrap)  $m/z$ : calcd for Chemical Formula:  $\text{C}_{24}\text{H}_{20}\text{ClN}_2\text{O}_3^+$   $[\text{M}+\text{H}]^+$  419.1157, found 419.1192.

### 1-(Dimethylcarbamoyl)-3-phenylindolizin-8-yl 4-(trifluoromethyl) benzoate (3ag).

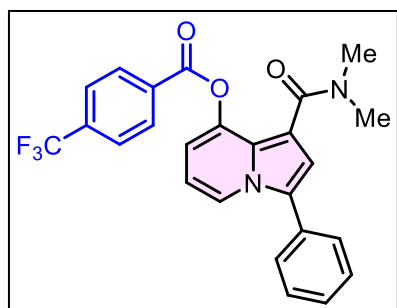

Brown semi-solid; 61mg, (68%).  $^1\text{H}$  NMR (500 MHz,  $\text{CDCl}_3$ )  $\delta$  8.40 (d,  $J = 8.1$  Hz, 2H), 8.18 (d,  $J = 7.1$  Hz, 1H), 7.84 (d,  $J = 8.1$  Hz, 2H), 7.57 (d,  $J = 7.6$  Hz, 2H), 7.53 (t,  $J = 7.5$  Hz, 2H), 7.43 (t,  $J = 7.3$  Hz, 1H), 6.85 (s, 1H), 6.77 (d,  $J = 7.2$  Hz, 1H), 6.62 (t,  $J = 7.2$  Hz, 1H), 2.94 (s, 3H), 2.63 (s, 3H).  $^{13}\text{C}\{^1\text{H}\}$  NMR (126 MHz,  $\text{CDCl}_3$ )  $\delta$  167.6,

163.4, 142.0, 132.3, 131.3, 130.8, 129.2, 128.6, 128.1, 126.8, 125.7 (q,  $^3J_{\text{C-F}} = 3.7$  Hz), 125.2, 122.5, 120.9, 113.6, 111.0, 110.5, 108.7, 39.4, 34.7.  $^{19}\text{F}$  NMR (470 MHz,  $\text{CDCl}_3$ )  $\delta$  -75.6. IR (ATR-FTIR)  $\nu$   $\text{cm}^{-1}$  2930, 2870, 2421, 2417, 1790, 1673, 1622, 1504, 1486, 1433, 1292, 1288, 1170, 1064, 1045, 975. HRMS (ESI-Orbitrap)  $m/z$ : calcd for Chemical Formula:  $\text{C}_{25}\text{H}_{20}\text{F}_3\text{N}_2\text{O}_3^+$   $[\text{M}+\text{H}]^+$  453.1421, found 453.1463.

### 1-(Dimethylcarbamoyl)-3-phenylindolizin-8-yl 4-nitro benzoate (3ah).

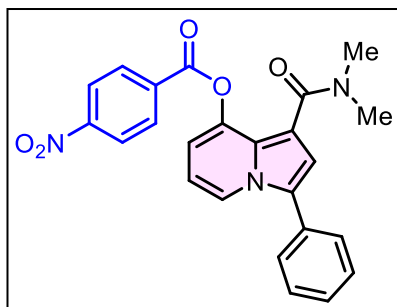

Yellow solid; 21mg, (24%).  $^1\text{H}$  NMR (500 MHz,  $\text{CDCl}_3$ )  $\delta$  8.46 (d,  $J = 7.9$  Hz, 2H), 8.42 (d,  $J = 9.2$  Hz, 2H), 8.19 (d,  $J = 7.1$  Hz, 1H), 7.56 (t,  $J = 7.5, 6.0$  Hz, 3H), 7.53 (d,  $J = 7.6$  Hz, 1H), 7.44 (t,  $J = 7.3$  Hz, 1H), 6.86 (s, 1H), 6.79 (d,  $J = 7.2$  Hz, 1H), 6.64 (t,  $J = 7.1$  Hz, 1H), 2.98 (s, 3H), 2.68 (s, 3H).  $^{13}\text{C}\{^1\text{H}\}$  NMR (125 MHz,  $\text{CDCl}_3$ )  $\delta$  167.5, 162.8, 150.9, 141.9, 134.6, 131.6, 131.2, 129.2, 128.6, 128.2,

126.8, 125.3, 123.7, 121.1, 113.8, 111.2, 110.5, 108.7, 39.5, 34.8. IR (ATR-FTIR)  $\nu$   $\text{cm}^{-1}$  2969, 2914, 2855, 2356, 2304, 1741, 1640, 1553, 1553, 1521, 1448, 1379, 1347, 1259, 1229, 1177, 1059, 1011,

985. **HRMS (ESI-Orbitrap) m/z:** calcd for Chemical Formula:  $C_{24}H_{20}N_3O_5^+$   $[M+H]^+$  430.1397, found 430.1421.

**1-(Dimethylcarbamoyl)-3-phenylindolizin-8-yl 3-iodo benzoate (3ai).**

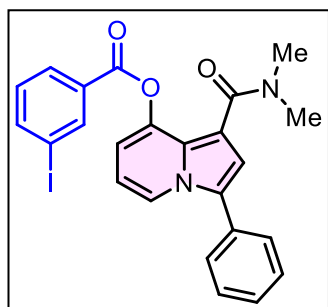

Brown sticky solid; 73mg, (72%).  $^1H$  NMR (500 MHz,  $CDCl_3$ )  $\delta$  8.56 (s, 1H), 8.25 (d,  $J = 7.3$  Hz, 1H), 8.17 (d,  $J = 7.3$  Hz, 1H), 8.00 (d,  $J = 7.8$  Hz, 1H), 7.57 (d,  $J = 7.5$  Hz, 2H), 7.53 (d,  $J = 7.5$  Hz, 2H), 7.43 (d,  $J = 7.5$  Hz, 1H), 7.32 (t,  $J = 7.9$  Hz, 1H), 6.85 (s, 1H), 6.74 (d,  $J = 7.2$  Hz, 1H), 6.61 (t,  $J = 7.2$  Hz, 1H), 2.95 (s, 3H), 2.69 (s, 3H).  $^{13}C\{^1H\}$  NMR (125 MHz,  $CDCl_3$ )  $\delta$  167.6, 163.1, 142.6, 142.0, 139.0, 131.3, 130.9, 130.4, 129.7, 129.2, 128.6, 128.1, 126.7, 125.1, 120.8, 113.7, 111.0, 110.5, 108.8, 93.9, 39.4, 34.8. **IR (ATR-FTIR)  $\nu$   $cm^{-1}$**  2930, 2855, 1794, 1561, 1468, 1411, 1286, 1171, 1072, 1015. **HRMS (ESI-Orbitrap) m/z:** calcd for Chemical Formula:  $C_{24}H_{20}IN_2O_3^+$   $[M+H]^+$  511.0513, found 511.0559.

**1-(Dimethylcarbamoyl)-3-phenylindolizin-8-yl 3-chloro benzoate (3aj).**

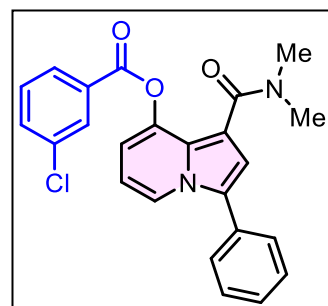

Light green sticky solid; 44mg, (53%).  $^1H$  NMR (500 MHz,  $CDCl_3$ )  $\delta$  8.22 (s, 1H), 8.17 (d,  $J = 7.1$  Hz, 2H), 7.65 (dt,  $J = 8.0, 1.6$  Hz, 1H), 7.59 – 7.56 (m, 2H), 7.56 – 7.50 (m, 3H), 7.43 (t,  $J = 7.3$  Hz, 1H), 6.85 (s, 1H), 6.76 (d,  $J = 7.2$  Hz, 1H), 6.61 (t,  $J = 7.2$  Hz, 1H), 2.94 (s, 3H), 2.68 (s, 3H).  $^{13}C\{^1H\}$  NMR (125 MHz,  $CDCl_3$ )  $\delta$  167.6, 163.4, 142.0, 134.7, 133.8, 131.4, 130.8, 130.3, 130.0, 129.1, 128.6, 128.6, 128.1, 126.7, 125.1, 120.8, 113.6, 110.9, 110.5, 108.9, 39.4, 34.7. **IR (ATR-FTIR)  $\nu$   $cm^{-1}$**  2923, 2853, 1793, 1698, 1600, 1572, 1468, 1411, 1285, 1171, 1072, 1019, 971. **HRMS (ESI-Orbitrap) m/z:** calcd for Chemical Formula:  $C_{24}H_{20}ClN_2O_3^+$   $[M+H]^+$  419.1157, found 419.1235.

**1-(Dimethylcarbamoyl)-3-phenylindolizin-8-yl 3-methylbenzoate (3ak).**

Dark green sticky solid; 34mg, (43%).  $^1H$  NMR (500 MHz,  $CDCl_3$ )  $\delta$  8.16 (d,  $J = 7.1$  Hz, 1H), 8.09 – 8.05 (m, 1H), 7.57 (d,  $J = 7.5$  Hz, 2H), 7.52 (d,  $J = 7.5$  Hz, 2H), 7.48 (dd,  $J = 15.0, 9.5$  Hz, 2H), 7.44

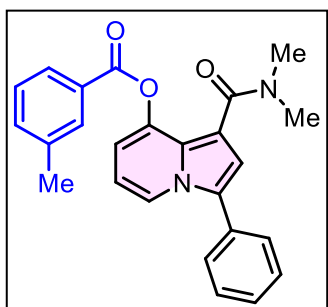

– 7.36 (m, 2H), 6.86 (s, 1H), 6.75 (d,  $J = 7.2$  Hz, 1H), 6.60 (t,  $J = 7.1$  Hz, 1H), 2.89 (s, 3H), 2.59 (s, 3H), 2.49 (s, 3H).  $^{13}C\{^1H\}$  NMR (125 MHz,  $CDCl_3$ )  $\delta$  167.9, 164.7, 142.2, 138.5, 134.7, 131.4, 130.9, 129.1, 128.7, 128.6, 128.5, 128.0, 127.6, 126.7, 125.1, 120.5, 113.6, 110.9, 110.6, 108.7, 39.3, 34.6, 21.4. **IR (ATR-FTIR)  $\nu$   $cm^{-1}$**  2927, 2856, 2380, 2310, 1742, 1682, 1600, 1552, 1512, 1457, 1371, 1264, 1231, 1171, 1130, 1018. **HRMS (ESI-Orbitrap) m/z:** calcd for Chemical Formula:  $C_{25}H_{23}N_2O_3^+$   $[M+H]^+$  399.1703, found 399.1737.

### 1-(Dimethylcarbamoyl)-3-phenylindolizin-8-yl 3,5-dimethyl benzoate (3al).

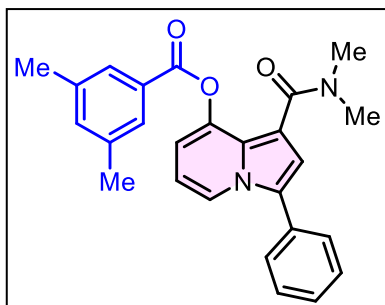

Light green semi-solid; 60mg, (73%).  $^1\text{H NMR}$  (500 MHz,  $\text{CDCl}_3$ )  $\delta$  8.17 – 8.12 (m, 1H), 7.88 (s, 2H), 7.58 (d,  $J = 7.0$  Hz, 2H), 7.52 (t,  $J = 7.6$  Hz, 2H), 7.42 (t,  $J = 7.4$  Hz, 1H), 7.30 (s, 1H), 6.86 (s, 1H), 6.74 (d,  $J = 7.2$  Hz, 1H), 6.59 (t,  $J = 7.2$  Hz, 1H), 2.89 (s, 3H), 2.62 (s, 3H), 2.45 (s, 6H).  $^{13}\text{C}\{^1\text{H}\}$  NMR (125 MHz,  $\text{CDCl}_3$ )  $\delta$  167.8, 164.8, 142.3, 138.3, 135.5, 131.5, 129.7, 129.1, 128.8, 128.6, 128.1, 127.9, 126.6,

125.1, 120.4, 113.6, 110.7, 110.5, 109.0, 62.7, 39.3, 34.5, 21.2. IR (ATR-FTIR)  $\nu$   $\text{cm}^{-1}$  2926, 2857, 2379, 2311, 2170, 2111, 1799, 1730, 1684, 1632, 1601, 1552, 1484, 1452, 1370, 1298, 1235, 1188, 1161, 1095, 1018. HRMS (ESI-Orbitrap)  $m/z$ : calcd for Chemical Formula:  $\text{C}_{26}\text{H}_{25}\text{N}_2\text{O}_3^+$   $[\text{M}+\text{H}]^+$  413.1860, found 413.1901.

### 1-(Dimethylcarbamoyl)-3-phenylindolizin-8-yl 2-naphthoate (3am).

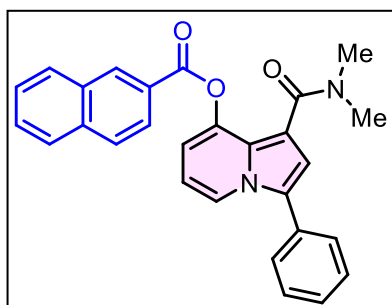

Dark green sticky solid; 36mg, (42%).  $^1\text{H NMR}$  (500 MHz,  $\text{CDCl}_3$ )  $\delta$  8.27 (d,  $J = 7.7$  Hz, 2H), 8.13 (dd,  $J = 13.2, 7.5$  Hz, 2H), 7.69 (t,  $J = 7.4$  Hz, 1H), 7.62 (t,  $J = 7.6$  Hz, 1H), 7.60 – 7.55 (m, 3H), 7.49 (t,  $J = 8.0$  Hz, 2H), 7.45 (d,  $J = 4.9$  Hz, 2H), 7.41 – 7.38 (m, 1H), 6.87 (s, 1H), 6.79 (d,  $J = 7.2$  Hz, 1H), 6.66 (t,  $J = 7.2$  Hz, 1H), 2.88 (s, 3H), 2.57 (s, 3H).  $^{13}\text{C}\{^1\text{H}\}$  NMR (125 MHz,  $\text{CDCl}_3$ )  $\delta$  167.7, 164.5, 142.2, 135.0,

134.0, 133.6, 133.2, 130.4, 130.2, 128.7, 128.7, 128.5, 128.3, 128.0, 126.5, 125.5, 125.2, 120.4, 114.0, 111.4, 111.0, 109.0, 39.3, 34.6. IR (ATR-FTIR)  $\nu$   $\text{cm}^{-1}$  2861, 2388, 2331, 1736, 1689, 1594, 1550, 1517, 1486, 1449, 1400, 1364, 1252, 1231, 1161, 1133, 1110, 1049, 1017. HRMS (ESI-Orbitrap)  $m/z$ : calcd for Chemical Formula:  $\text{C}_{28}\text{H}_{23}\text{N}_2\text{O}_3^+$   $[\text{M}+\text{H}]^+$  435.1703, found 435.1745

### 1-(Dimethylcarbamoyl)-3-phenylindolizin-8-yl thiophene-2-carboxylate (3an).

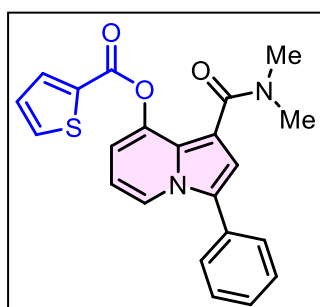

Dark green solid; 42mg, (53%). M.P: 142-144°C;  $^1\text{H NMR}$  (500 MHz,  $\text{CDCl}_3$ )  $\delta$  8.15 (d,  $J = 7.1$  Hz, 1H), 8.09 (d,  $J = 3.7$  Hz, 1H), 7.72 (d,  $J = 4.9$  Hz, 1H), 7.57 (d,  $J = 7.6$  Hz, 2H), 7.52 (t,  $J = 7.5$  Hz, 2H), 7.42 (t,  $J = 7.3$  Hz, 1H), 7.23 (t,  $J = 4.4$  Hz, 1H), 6.86 (s, 1H), 6.75 (d,  $J = 7.2$  Hz, 1H), 6.59 (t,  $J = 7.2$  Hz, 1H), 2.93 (s, 3H), 2.69 (s, 3H).  $^{13}\text{C}\{^1\text{H}\}$  NMR (125 MHz,  $\text{CDCl}_3$ )  $\delta$  167.7, 160.0, 141.8, 135.3, 133.9, 132.1, 131.4, 129.1, 128.6,

128.2, 128.0, 126.7, 125.0, 120.7, 113.6, 110.9, 110.5, 108.8, 39.4, 34.6. IR (ATR-FTIR)  $\nu$   $\text{cm}^{-1}$  2925, 2855, 2593, 2408, 2311, 2169, 1734, 1619, 1551, 1514, 1408, 1364, 1296, 1254, 1224, 1206, 1161, 1127, 1043, 1013. HRMS (ESI-Orbitrap)  $m/z$ : calcd for Chemical Formula:  $\text{C}_{22}\text{H}_{19}\text{N}_2\text{O}_3\text{S}^+$   $[\text{M}+\text{H}]^+$  391.1111, found 391.1150.

### 1-(Dimethylcarbamoyl)-3-phenylindolizin-8-yl (E)-3-phenylacrylate (3ao).

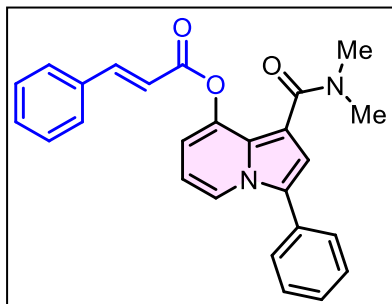

Dark brown sticky solid; 48mg, (56%). M.P: 137-138°C;  $^1\text{H NMR}$  (500 MHz,  $\text{CDCl}_3$ )  $\delta$  8.15 (d,  $J = 7.2$  Hz, 1H), 7.95 (d,  $J = 15.9$  Hz, 1H), 7.68 – 7.63 (m, 2H), 7.57 (d,  $J = 7.7$  Hz, 2H), 7.52 (t,  $J = 7.5$  Hz, 2H), 7.49 – 7.44 (m, 3H), 7.42 (t,  $J = 6.8$  Hz, 1H), 6.86 (s, 1H), 6.74 (d,  $J = 7.2$  Hz, 1H), 6.69 (d,  $J = 16.0$  Hz, 1H), 6.59 (t,  $J = 7.3$  Hz, 1H), 2.99 (s, 6H).  $^{13}\text{C}\{^1\text{H}\}$  NMR (125 MHz,  $\text{CDCl}_3$ )  $\delta$  168.0, 164.7, 147.2, 142.1, 134.0, 131.4, 130.9, 129.2, 129.1, 128.6, 128.5, 128.0, 126.6, 125.2, 120.5, 116.6, 113.6, 110.8, 110.6, 108.7, 39.5, 35.2. IR (ATR-FTIR)  $\nu$   $\text{cm}^{-1}$  2921, 2852, 2311, 1732, 1628, 1552, 1516, 1454, 1407, 1372, 1332, 1303, 1261, 1199, 1164, 1120, 1021, 976. HRMS (ESI-Orbitrap)  $m/z$ : calcd for Chemical Formula:  $\text{C}_{26}\text{H}_{23}\text{N}_2\text{O}_3^+ [\text{M}+\text{H}]^+$  411.1703, found 411.1743.

### 8-Hydroxy-N,N-dimethyl-3-phenylindolizine-1-carboxamide (4a).

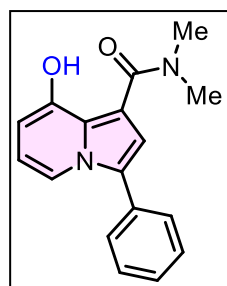

Light brown solid; 32mg, (88%). M.P: 120-121°C;  $^1\text{H NMR}$  (500 MHz,  $\text{CDCl}_3$ )  $\delta$  12.49 (s, 1H), 7.84 (d,  $J = 6.9$  Hz, 1H), 7.56 – 7.52 (m, 3H), 7.51 (d,  $J = 7.7$  Hz, 1H), 7.45 – 7.41 (m, 1H), 6.95 (s, 1H), 6.66 (t,  $J = 7.1$  Hz, 1H), 6.49 (d,  $J = 7.4$  Hz, 1H), 3.33 (s, 6H).  $^{13}\text{C}\{^1\text{H}\}$  NMR (125 MHz,  $\text{CDCl}_3$ )  $\delta$  169.3, 150.2, 131.4, 131.1, 129.1, 128.9, 128.2, 126.2, 114.8, 114.6, 114.2, 105.7, 104.2, 39.3. IR (ATR-FTIR)  $\nu$   $\text{cm}^{-1}$  3521, 2922, 2890, 1751, 1601, 1479, 1320, 1099, 1080. HRMS (ESI-Orbitrap)  $m/z$ : calcd for Chemical Formula:  $\text{C}_{17}\text{H}_{17}\text{N}_2\text{O}_2^+ [\text{M}+\text{H}]^+$  281.1285, found 281.1310.

### 8-Hydroxy-N,N-dimethyl-3-(p-tolyl)indolizine-1-carboxamide (4b).

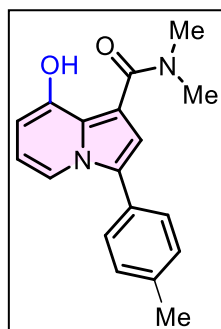

Light green solid; 36 mg (62%); M.P: 134-135°C;  $^1\text{H NMR}$  (500 MHz, Chloroform-*d*)  $\delta$  12.48 (s, 1H), 7.81 (d,  $J = 6.8$  Hz, 1H), 7.43 (d,  $J = 7.8$  Hz, 2H), 7.32 (d,  $J = 7.8$  Hz, 2H), 6.92 (s, 1H), 6.65 (t,  $J = 7.2$  Hz, 1H), 6.47 (d,  $J = 7.4$  Hz, 1H), 3.33 (s, 6H), 2.45 (s, 3H).  $^{13}\text{C}\{^1\text{H}\}$  NMR (126 MHz,  $\text{CDCl}_3$ )  $\delta$  169.3, 150.2, 138.2, 130.9, 129.8, 128.8, 128.4, 126.3, 114.9, 114.3, 114.1, 105.6, 104.0, 39.3, 21.3. IR (ATR-FTIR)  $\nu$   $\text{cm}^{-1}$  3577, 2892, 2890, 1741, 1752, 1612, 1610, 1479,

1421, 1320, 1099, 1080, 1016. HRMS (ESI-Orbitrap)  $m/z$ : calcd for Chemical Formula:  $\text{C}_{18}\text{H}_{19}\text{N}_2\text{O}_2^+ [\text{M}+\text{H}]^+$  295.1441, found 295.1468

### 1-(Dimethylcarbamoyl)-3-(4-nitrophenyl)indolizin-8-yl dodecanoate (3eq).

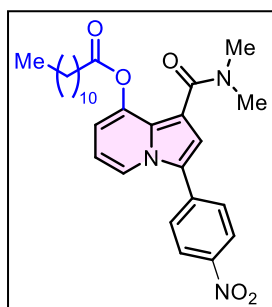

Dark brown sticky solid; 26mg, (52%).  $^1\text{H NMR}$  (500 MHz, Chloroform-*d*)  $\delta$  8.37 (d,  $J = 8.5$  Hz, 2H), 8.19 (d,  $J = 7.0$  Hz, 1H), 7.74 (d,  $J = 8.6$  Hz, 2H), 7.00 (s, 1H), 6.74 (d,  $J = 7.2$  Hz, 1H), 6.69 (t,  $J = 7.1$  Hz, 1H), 3.17 (s, 3H), 3.04 (s, 3H), 2.62 (t,  $J = 7.6$  Hz, 2H), 1.75 (p,  $J = 7.5$  Hz, 2H), 1.35 – 1.26 (m, 16H), 0.90 (t,  $J = 6.8$  Hz, 3H).  $^{13}\text{C}\{^1\text{H}\}$  NMR (125 MHz,  $\text{CDCl}_3$ )  $\delta$  171.6, 167.5, 146.6, 142.3, 137.8, 128.1, 127.5, 124.6, 124.6, 124.1, 120.2, 115.6, 112.5, 111.9, 33.9, 31.9, 29.6, 29.5, 29.4, 29.3, 29.2, 24.6, 22.7, 14.1. IR (ATR-FTIR)  $\nu$   $\text{cm}^{-1}$  2951, 2843, 2301, 1614, 1595, 1546, 1461, 1413, 1372, 1362, 1308, 1264, 1187, 1164, 1123, 1020. HRMS (ESI-Orbitrap)  $m/z$ : calcd for Chemical Formula:  $\text{C}_{29}\text{H}_{38}\text{N}_3\text{O}_5^+ [\text{M}+\text{H}]^+$  508.2806, found 508.2853.

### 1-(Dimethylcarbamoyl)-3-(3-chlorophenyl)indolizin-8-yl dodecanoate (3fq).

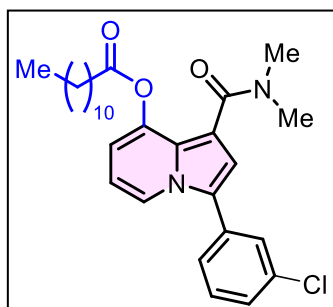

Light brown oil; 41mg, (41%).  $^1\text{H NMR}$  (500 MHz, Chloroform-*d*)  $\delta$  8.09 (d,  $J = 7.0$  Hz, 1H), 7.55 – 7.51 (m, 1H), 7.46 – 7.40 (m, 2H), 7.41 – 7.34 (m, 1H), 6.85 (s, 1H), 6.66 (d,  $J = 7.2$  Hz, 1H), 6.60 (t,  $J = 7.1$  Hz, 1H), 3.09 (d,  $J = 53.5$  Hz, 6H), 2.62 (t,  $J = 7.6$  Hz, 2H), 2.35 (t,  $J = 7.6$  Hz, 2H), 1.75 (p,  $J = 7.6$  Hz, 2H), 1.30 – 1.28 (m, 14H), 0.90 (t,  $J = 6.7$  Hz, 3H).  $^{13}\text{C}\{^1\text{H}\}$  NMR (126 MHz,  $\text{CDCl}_3$ )  $\delta$  178.9, 171.7, 167.7, 142.3, 139.3, 135.0, 133.1, 130.4, 128.4, 128.0, 126.8, 126.5, 126.3, 125.0, 124.8, 120.3, 114.3, 114.1, 111.5, 111.0, 108.7, 34.0, 33.9, 31.9, 29.7, 29.6, 29.6, 29.3, 29.3, 29.2, 29.1, 24.7, 24.6, 22.7, 14.1. IR (ATR-FTIR)  $\nu$   $\text{cm}^{-1}$  2851, 2312, 1611, 1585, 1551, 1476, 1413, 1391, 1382, 1306, 1262, 1188, 1162, 1160, 1135, 1123, 1120, 1020. HRMS (ESI-Orbitrap)  $m/z$ : calcd for Chemical Formula:  $\text{C}_{29}\text{H}_{38}\text{ClN}_2\text{O}_3^+ [\text{M}+\text{H}]^+$  497.2565, found 497.2581.

## 2.4. Unsuccessful substrates:

Unsuccessful coupling partners:

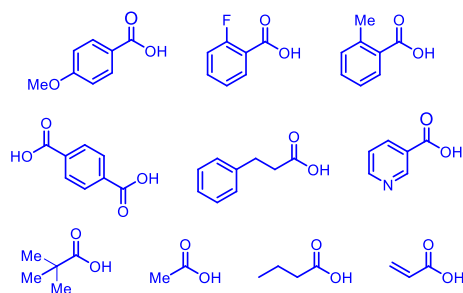

API/Bioactive/Natural product scaffolds containing COOH:

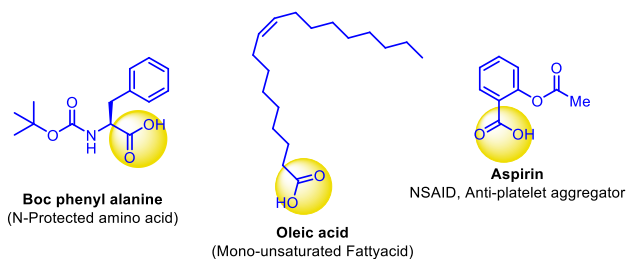

Unsuccessful Directing groups:

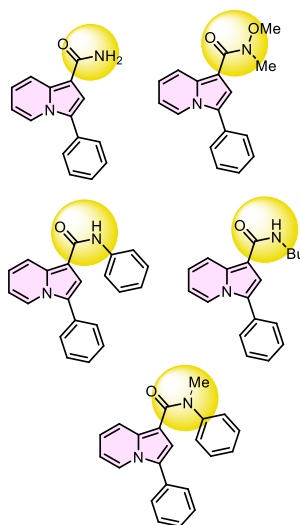

Other Unsuccessful Indolizines:

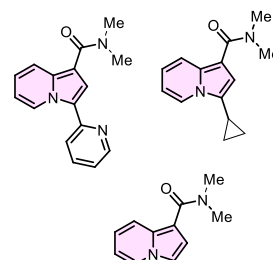

## 3. Scale-up & Post Synthetic Diversification

### 3.1 Scale up experiment of C-8 Acyloxylation of Indolizine:

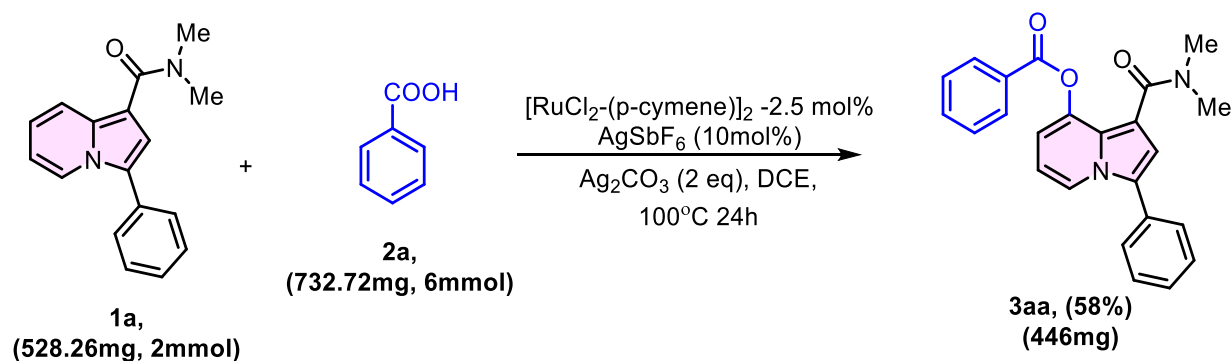

Scheme-S4: Scale-up synthesis of **3aa**.

The oven dried reaction tube equipped with magnetic stir bar was loaded with  $\text{Ru}[(p\text{-cymene})\text{Cl}_2]_2$  (30.6 mg, 2.5 mol%),  $\text{AgSbF}_6$  (68.7 mg, 10 mol%), N,N-dimethyl-3-phenylindolizine-1-carboxamide (**1a**) (528.2 mg, 2 mmol) and benzoic acid (**2a**) (732.72 mg, 6 mmol). Further,  $\text{Ag}_2\text{CO}_3$  (1.10 g, 2 equiv) and DCE (10 mL) were added to the reaction tube. The reaction mixture was stirred 100 °C for 24 hours. After completion, the reaction was cooled to ambient temperature, diluted with ethyl acetate and passed through celite pad. The organic compounds were collected completely, concentrated under reduced pressure and purified by column chromatography on silica gel (230-400

mesh, 1:1 EtOAc/Hexane) to obtain the corresponding acyloxylated product **3aa** in 53% yield (407.2 mg).

### 3.2 Ester hydrolysis reaction of **3ba**:

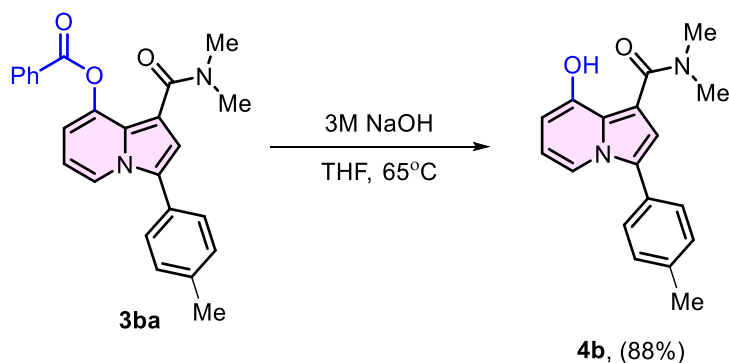

**Scheme-S5-** Ester hydrolysis of **3ba**.

A 3M NaOH solution (3mL) was added to a 50ml oven dried round bottom flask, containing a solution of 1-(dimethylcarbamoyl)-3-(p-tolyl) indolizin-8-yl benzoate (**3ba**) (50 mg, 0.125 mmol) in 4mL THF. The reaction mixture was heated at 60 °C for overnight. The reaction was monitored for complete conversion by TLC, and upon completion of the reaction, the mixture was allowed to cool. Then the pH of the solution was adjusted to acidic range (pH 1-2) with 1N HCl. The mixture was extracted with ethyl acetate (30mL x 3) and washed with brine solution, organic layers were combined and concentrated under reduced pressure. The crude residue was then purified by silica gel column chromatography to provide 31 mg (88%) of **4b**.

### 3.3 Functionalisation of hydroxyl group:

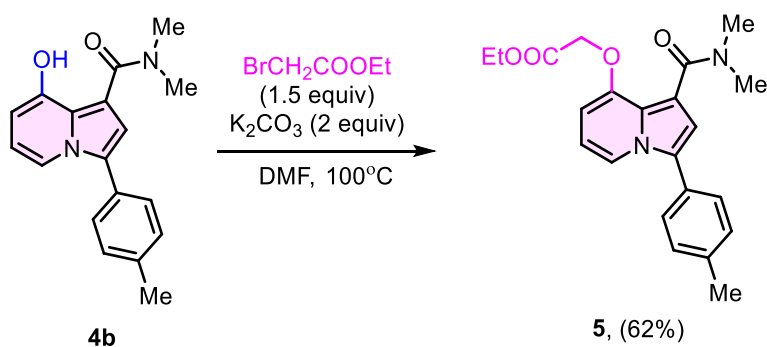

**Scheme-S6** Functionalization of Hydroxyl group.

0.2 mmol (59 mg) of **4b** in DMF (5 mL) was mixed in an oven dried reaction tube with 2 equivalents (55 mg) of Potassium carbonate and 1.5 equivalents (50 mg) of Ethyl bromoacetate at 100 °C for 5 hours. The reaction was monitored by TLC and upon completion, the contents were cooled to ambient temperature. The reaction was poured to water (10 mL) and extracted with ethyl acetate (15 mL x 3) and washed with brine solution. The organic phases were combined, concentrated under reduced pressure and purified by silica gel column chromatography (Hexane: Ethyl acetate- 1:1) to yield **5**.

## Ethyl 2-((1-(dimethylcarbamoyl)-3-(*p*-tolyl)indolizin-8-yl)oxy)acetate (**5**).

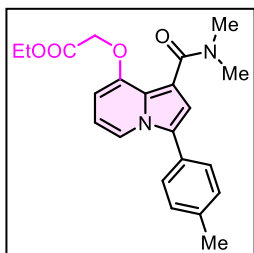

Reddish brown sticky solid; 47mg (62%).  $^1\text{H}$  NMR (500 MHz, Chloroform-*d*)  $\delta$  7.44 (d,  $J = 8.1$  Hz, 2H), 7.29 (d,  $J = 9.2$  Hz, 2H), 6.81 (s, 1H), 6.40 (t,  $J = 7.2$  Hz, 1H), 5.99 (d,  $J = 7.3$  Hz, 1H), 4.68 (s, 2H), 4.29 (q,  $J = 7.1$  Hz, 2H), 3.20 (s, 3H), 3.03 (s, 3H), 2.43 (s, 3H), 1.33 (t,  $J = 7.2$  Hz, 4H).  $^{13}\text{C}\{^1\text{H}\}$  NMR (126 MHz,  $\text{CDCl}_3$ )  $\delta$  168.8, 168.1, 149.9, 137.6, 129.7, 128.8, 128.4, 126.9, 123.4, 117.1, 112.9, 110.4, 109.7, 96.4, 65.6, 61.4, 39.3, 35.1, 34.1, 14.1. IR (ATR-FTIR)  $\nu$   $\text{cm}^{-1}$  2905, 2811, 2438, 2240, 1732, 1640, 1611, 1543, 1457, 1390, 1141, 1132, 1049, 1011. HRMS (ESI-Orbitrap)  $m/z$ : calcd for Chemical Formula:  $\text{C}_{22}\text{H}_{25}\text{N}_2\text{O}_4^+ [\text{M}+\text{H}]^+$  381.1809, found 381.1843

## 4. Mechanistic investigation

### 4.1 Deuterium labelling experiment:

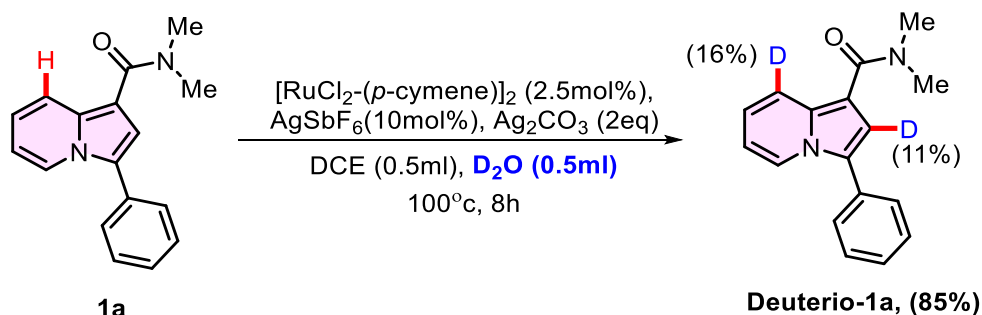

Scheme-S7 Deuterium labelling of **1a**.

The oven dried reaction tube with magnetic stir bar was loaded with  $[\text{RuCl}_2\text{-}(p\text{-cymene})]_2$  (2.3 mg, 2.5 mol%),  $\text{AgSbF}_6$  (5 mg, 10 mol%), *N,N*-dimethyl-3-phenylindolizine-1-carboxamide (**1a**) (40 mg, 0.15 mmol) and 2 equivalents (83mg) of silver carbonate. Next,  $\text{D}_2\text{O}$  (0.5mL) and 0.5 mL of DCE was added and the reaction was stirred under reflux at  $100^\circ\text{C}$  for 8 hours. After completion, the reaction was cooled to ambient temperature, diluted with ethyl acetate and passed through celite pad. The organic compounds were collected completely, concentrated under reduced pressure and purified by column chromatography on silica gel (230-400 mesh, 1:1 EtOAc/Hexane) to obtain the product.

## N,N-dimethyl-3-phenylindolizine-1-carboxamide-2,8-d<sub>2</sub> : (Deuterio-1a)

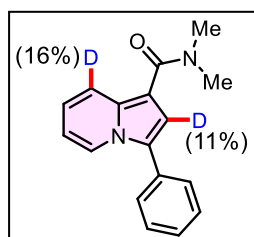

Dark green oil; 34mg, (85%). <sup>1</sup>H NMR (500 MHz, Chloroform-*d*) δ 8.26 (dd, *J* = 7.2, 1.2 Hz, 1H), 7.98 (dt, *J* = 9.7, 0.7 Hz, 0.84H), 7.58 – 7.54 (m, 2H), 7.51 (q, *J* = 7.9, 7.4, 6.5 Hz, 2H), 7.41 (tt, *J* = 7.4, 1.4, 0.9 Hz, 1H), 7.00 (s, 0.89H), 6.94 (ddd, *J* = 9.2, 6.5, 1.1 Hz, 1H), 6.64 (td, *J* = 6.8, 1.3 Hz, 1H), 3.23 (s, 6H).

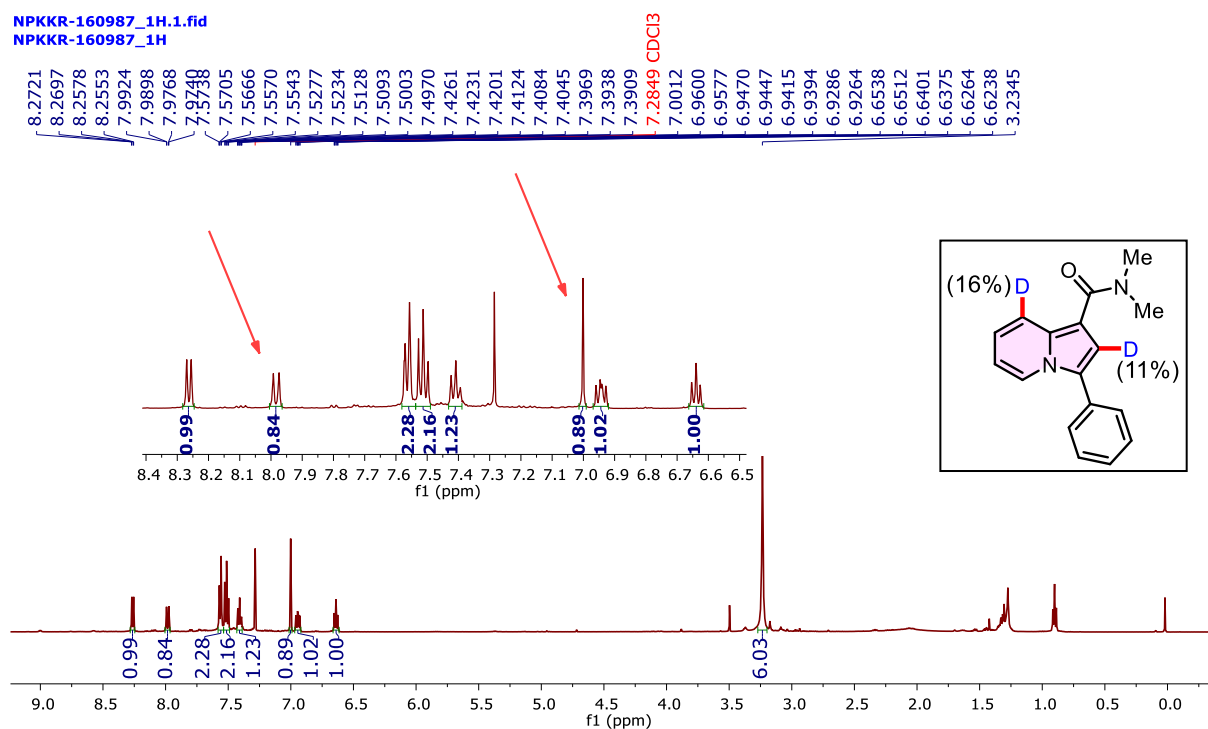

### 4.2 Radical quenching experiment:

Oven dried reaction tubes were loaded with 0.2 mmol (50mg) of N,N-dimethyl-3-phenyl indolizine-1-carboxamide (**1a**), 3 equivalents (73mg) of benzoic acid. 2.5 mol% of [RuCl<sub>2</sub>(*p*-cymene)]<sub>2</sub> (3mg), 10 mol% of Silver hexafluoro antimonate (7mg) and 2 equivalents of silver carbonate (110mg) were added to the tubes. The tubes were respectively loaded with 1 equivalent (31mg) and 2 equivalents (62mg) of TEMPO and 1 mL of DCE and stirred under reflux for 24 hours. After completion of the reaction, the tubes were cooled to room temperature, diluted with ethyl acetate and passed through celite pad. The organic compounds were collected completely, concentrated under reduced pressure and purified by column chromatography on silica gel (230-400 mesh, 1:1 EtOAc/Hexane).

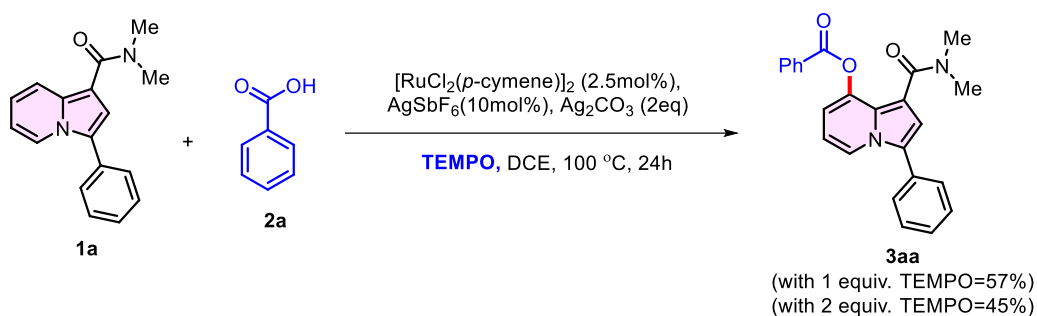

**Scheme-S8** Radical quenching experiment.

### 4.3 High resolution mass analysis:

In order to ascertain the possible intermediate formation, aliquots were collected at shorter time interval from the reaction (**Scheme-S3**) and analysed by High resolution mass spectrometry under ESI condition (Positive mode). The following figure represents the corresponding chromatogram and mass spectrum of the detected Ruthenium chelation intermediate.

C:\Users\...\MCRS\_K45\_06\MCRS\_K20\_02

05/13/26 12:02:32

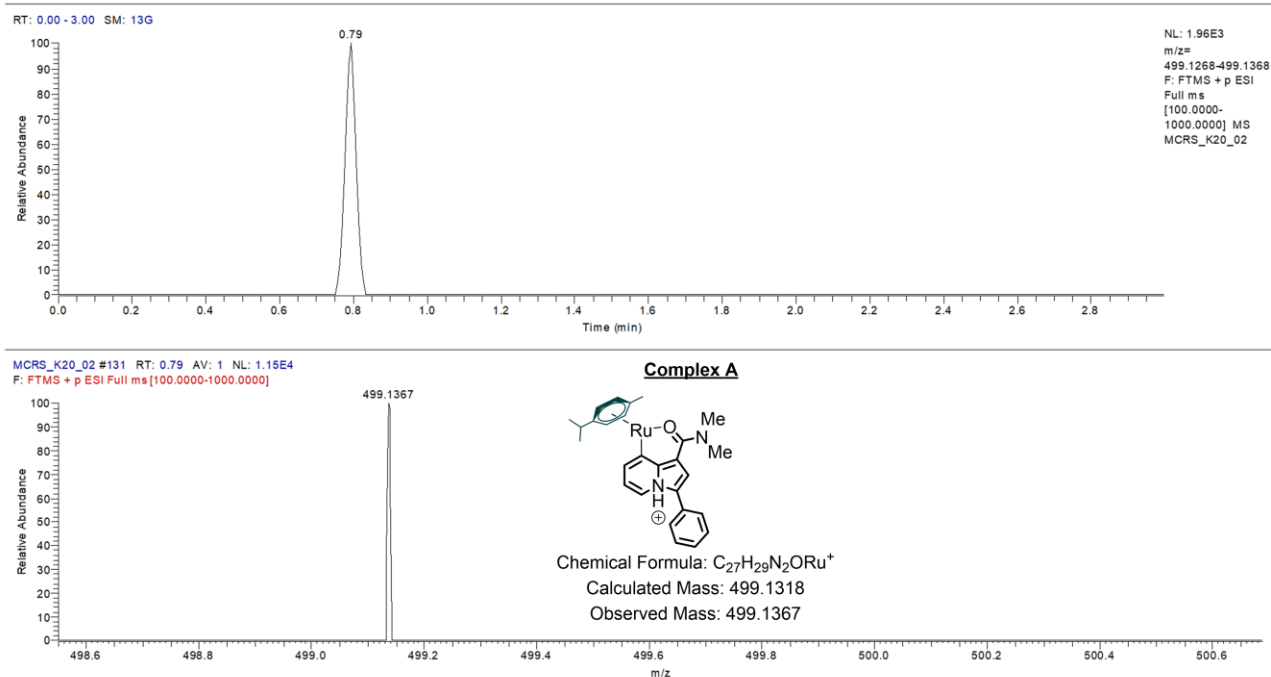

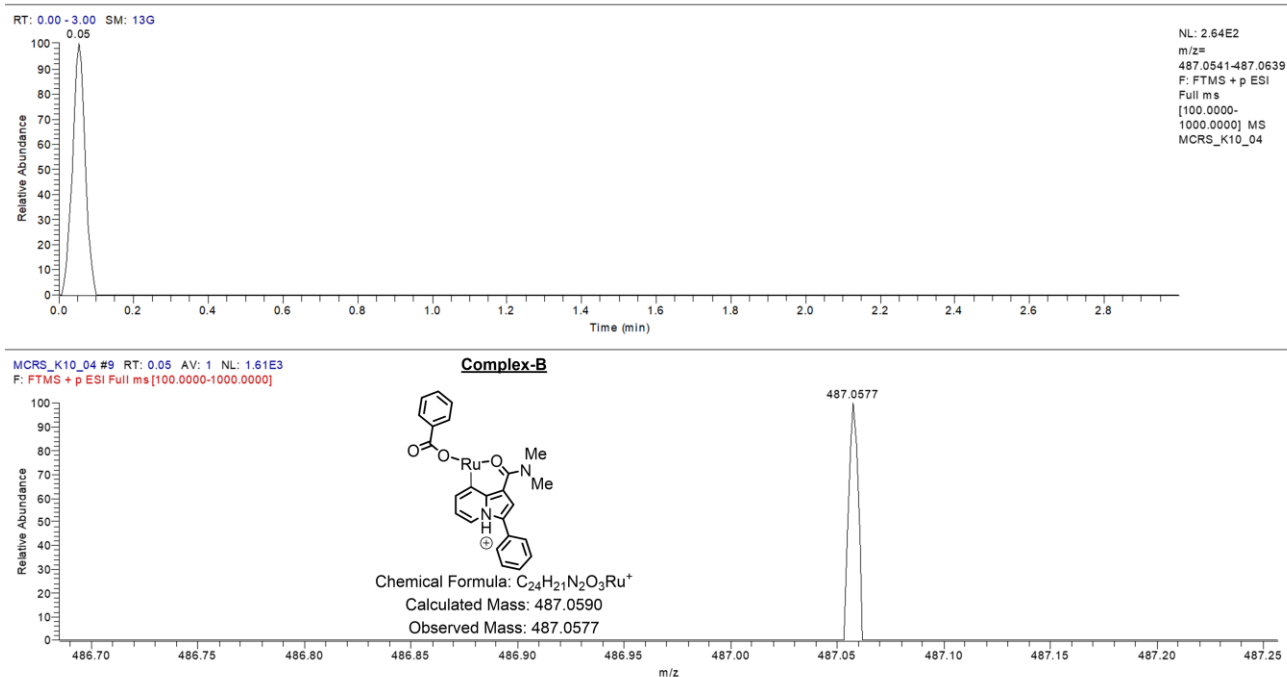

**FigureS1.** HRMS analysis of detected Ruthenium chelation intermediates (**Complex A** and **Complex B**).

#### 4.4. Plausible Mechanistic Cycle

We propose a plausible mechanistic cycle, where the Ru(II) catalyst is activated into an active cationic Ru(II) complex, by the AgSbF<sub>6</sub>. This active Ru(II) complex, reversibly and weakly co-ordinates with the carbonyl oxygen of the amide directing group on indolizine (**1**) and undergoes a preferential C–H activation at C-8 position to form a six membered ruthenacycle (**Complex A**) (**Scheme S9**). Further, **complex A** coordinates with the carboxylic acid (**2**) to generate **complex B**. On reductive elimination, the acyloxyated product (**3**) is produced with the generation of Ru(0) species, which is further oxidized by silver (II) oxidant, in the presence of carboxylic acid to regenerate Ru(II) catalyst

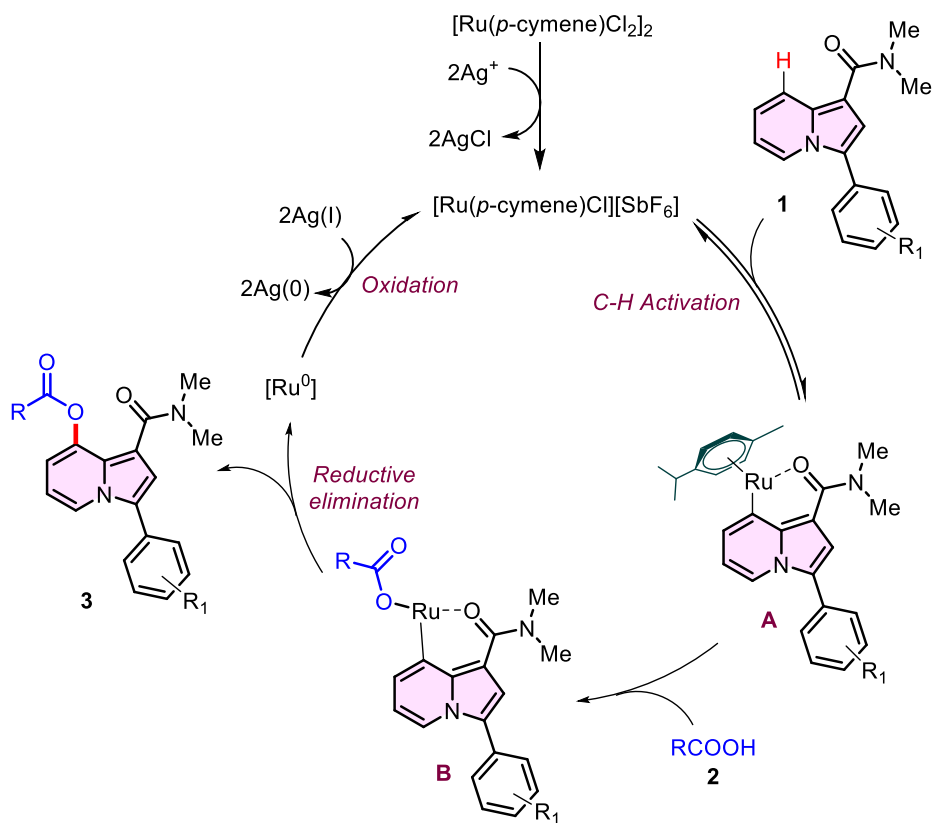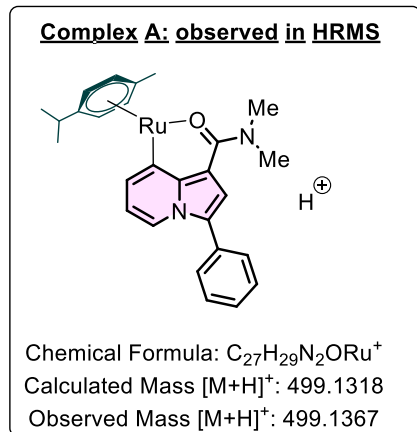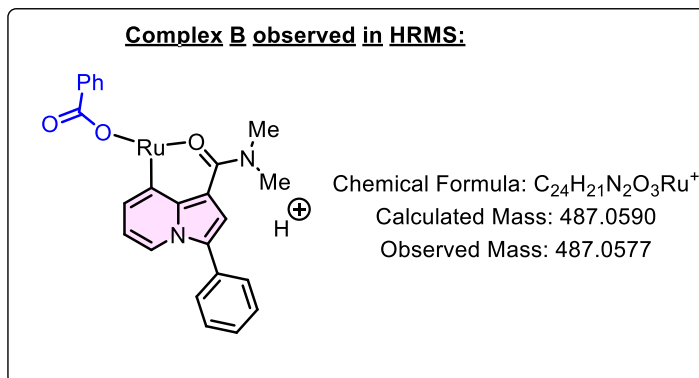

**Scheme S9-Plausible Mechanistic cycle**

## 5. Single crystal X-Ray analysis (3ac; CCDC2487967)

Crystals of **3ac** (C<sub>30</sub>H<sub>24</sub>N<sub>2</sub>O<sub>3</sub>) were grown in a dual solvent phase (Pentane:Chloroform). A suitable crystal was selected and analysed on a SuperNova, Single source at offset/far, HyPix3000 diffractometer. The crystal was kept at 293(2) K during data collection. Using Olex2<sup>4</sup>, the structure was solved with the SHELXT<sup>5</sup> structure solution program using Intrinsic Phasing and refined with the SHELXL<sup>6</sup> refinement package using Least Squares minimisation.

No syntax errors found.

[CIF dictionary](#)

Please wait while processing ....

[Interpreting this report](#)

**Datablock: ex-nikkre236\_auto**

---

|                                                                         |                                                  |                    |
|-------------------------------------------------------------------------|--------------------------------------------------|--------------------|
| Bond precision:                                                         | C-C = 0.0031 A                                   | Wavelength=0.71073 |
| Cell:                                                                   | a=12.8704(5)      b=6.3555(2)      c=29.2525(13) |                    |
|                                                                         | alpha=90      beta=97.402(4)      gamma=90       |                    |
| Temperature: 293 K                                                      |                                                  |                    |
|                                                                         | Calculated                                       | Reported           |
| Volume                                                                  | 2372.85(16)                                      | 2372.84(17)        |
| Space group                                                             | P 21/c                                           | P 1 21/c 1         |
| Hall group                                                              | -P 2ybc                                          | -P 2ybc            |
| Moiety formula                                                          | C30 H24 N2 O3                                    | C30 H24 N2 O3      |
| Sum formula                                                             | C30 H24 N2 O3                                    | C30 H24 N2 O3      |
| Mr                                                                      | 460.51                                           | 460.51             |
| Dx, g cm <sup>-3</sup>                                                  | 1.289                                            | 1.289              |
| Z                                                                       | 4                                                | 4                  |
| Mu (mm <sup>-1</sup> )                                                  | 0.084                                            | 0.084              |
| F000                                                                    | 968.0                                            | 968.0              |
| F000'                                                                   | 968.42                                           |                    |
| h,k,lmax                                                                | 16,8,37                                          | 16,8,37            |
| Nref                                                                    | 5262                                             | 4864               |
| Tmin,Tmax                                                               |                                                  | 0.801,1.000        |
| Tmin'                                                                   |                                                  |                    |
| Correction method= # Reported T Limits: Tmin=0.801 Tmax=1.000 AbsCorr = |                                                  |                    |
| MULTI-SCAN                                                              |                                                  |                    |
| Data completeness= 0.924                                                | Theta(max)= 27.140                               |                    |
| R(reflections)= 0.0518( 3098)                                           | wR2(reflections)= 0.1538( 4864)                  |                    |
| S = 1.056                                                               | Npar= 319                                        |                    |

---

The following ALERTS were generated. Each ALERT has the format

**test-name\_ALERT\_alert-type\_alert-level.**

Click on the hyperlinks for more details of the test.

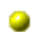

### Alert level C

- [PLAT031\\_ALERT\\_4\\_C](#) Refined Extinction Parameter Within Range of ... 2.750 Sigma
- [PLAT053\\_ALERT\\_1\\_C](#) Minimum Crystal Dimension Missing (or Error) ... Please Check
- [PLAT054\\_ALERT\\_1\\_C](#) Medium Crystal Dimension Missing (or Error) ... Please Check
- [PLAT055\\_ALERT\\_1\\_C](#) Maximum Crystal Dimension Missing (or Error) ... Please Check
- [PLAT910\\_ALERT\\_3\\_C](#) Missing FCF Reflection(s) Below Theta(Min)[Deg]= 3.28 Note

1 0 0, 2 0 0, -1 0 2, 0 0 2, 1 0 2, -1 0 4,

0 0 4,

PLAT911 [ALERT 3 C](#) Missing FCF Refl Between Thmin & STh/L= 0.600 39 Report

-2 0 2, -3 0 4, -2 0 4, -3 0 6, -4 0 8, 10 1 9,  
10 0 10, -7 0 12, 7 0 20, 8 1 21, -11 3 22, 7 0 22,  
7 1 22, 8 0 22, 8 1 22, 9 0 22, 9 1 22, 10 1 22,  
7 1 23, 8 1 23, 9 1 23, 10 1 23, 7 0 24, 7 1 24,  
8 0 24, 8 1 24, 9 0 24, 9 1 24, 7 1 25, 8 1 25,  
( 9 More Missing: see the .ckf listing file)

#### Alert level G

PLAT199 [ALERT 1 G](#) Reported \_cell\_measurement\_temperature ..... (K) 293 Check

PLAT200 [ALERT 1 G](#) Reported \_diffrn\_ambient\_temperature ..... (K) 293 Check

PLAT432 [ALERT 2 G](#) Short Inter X...Y Contact C8 ..C9 . 3.19 Ang.

1-x,1-y,1-z = 3.666 Check

PLAT912 [ALERT 4 G](#) Missing # of FCF Reflections Above STh/L= 0.600 348 Note

PLAT941 [ALERT 3 G](#) Average HKL Measurement Multiplicity ..... 4.7 Low

PLAT955 [ALERT 1 G](#) Reported (CIF) and Actual (FCF) Lmax Differ by . 1 Units

PLAT969 [ALERT 5 G](#) The 'Henn et al.' R-Factor-gap value ..... 2.774 Note

Predicted wr2: Based on Sigl\*\*2 5.54 or SHELX Weight 14.56

PLAT978 [ALERT 2 G](#) Number C-C Bonds with Positive Residual Density. 3 Info

0 **ALERT level A** = Most likely a serious problem - resolve or explain

0 **ALERT level B** = A potentially serious problem, consider carefully

6 **ALERT level C** = Check. Ensure it is not caused by an omission or oversight

8 **ALERT level G** = General information/check it is not something unexpected

PLATON version of 04/06/2025; check.def file version of 30/05/2025

Datablock ex-nikkre236\_auto - ellipsoid plot

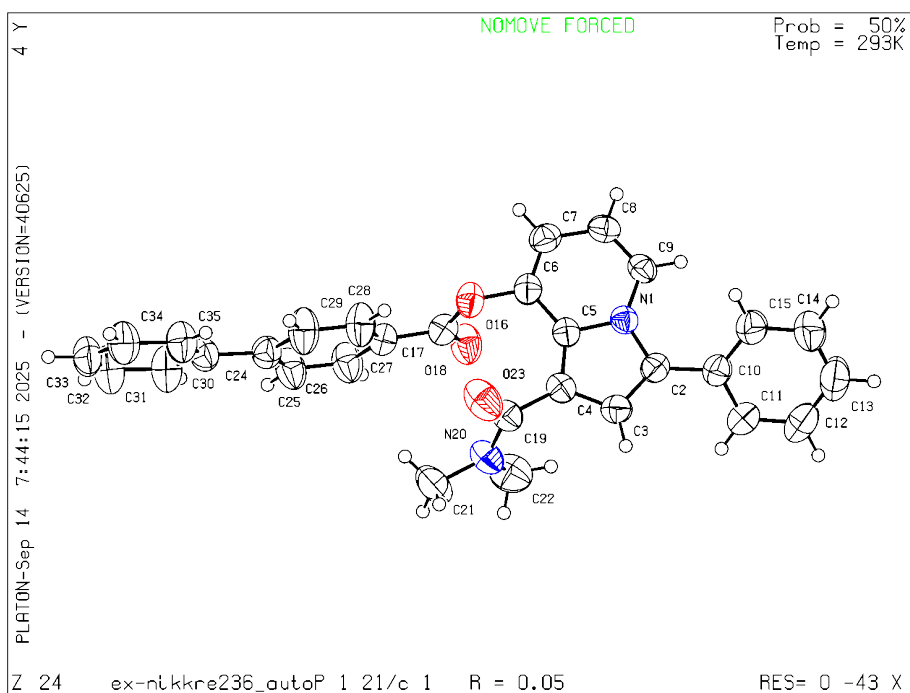

## 6. In vitro Anti-cancer evaluation

### 6.1. Preliminary Cytotoxicity assay

The cytotoxic activity of the Indolizine derivatives was evaluated using the Alamar Blue assay<sup>7</sup>. The cells in this study were maintained at standard culture conditions in 37°C incubator and 5% CO<sub>2</sub>. MCF-7 and MDA-MB-231 were cultured in DMEM Medium (GIBCO). A280 cell line was maintained in RPMI 1640 (GIBCO). MCF-10A was grown in DMEM/F12 (GIBCO) supplemented in 5% Horse Serum, EGF (20ng/ul), Hydrocortisone(0.5mg/ml), Cholera Toxin(100ng/ml), Insulin(10ug/ml). All the cell lines except MCF-10A were supplemented with 10% FBS (GIBCO) and Antibiotic Antimycotic solution (HiMedia).

The MCF-7, MDA-MB-231, and A2780 cell lines were seeded in 96-well plates at a density of 5,000 cells per well and maintained at 5% CO<sub>2</sub> incubator. Once the cells have attached, medium was removed and replaced with serum-free medium, and the plates were incubated overnight. Following 12–16 hours of serum starvation, the incomplete medium was replaced with treatment medium supplemented with a single dose of the novel indolizine derivatives, and cells were incubated for 24 and 48 hours, respectively. Cell viability was assessed using the Alamar Blue fluorometric assay at each time point. The reagent was added to each well and incubated for 3–4 hours, fluorescence was measured at an excitation/emission wavelength of 560/590 nm using a Varioskan Lux Multimode Microplate Reader. Percentage cell viability was subsequently calculated using Microsoft Excel, and dose–response graphs were plotted using GraphPad Prism (version 8.0).

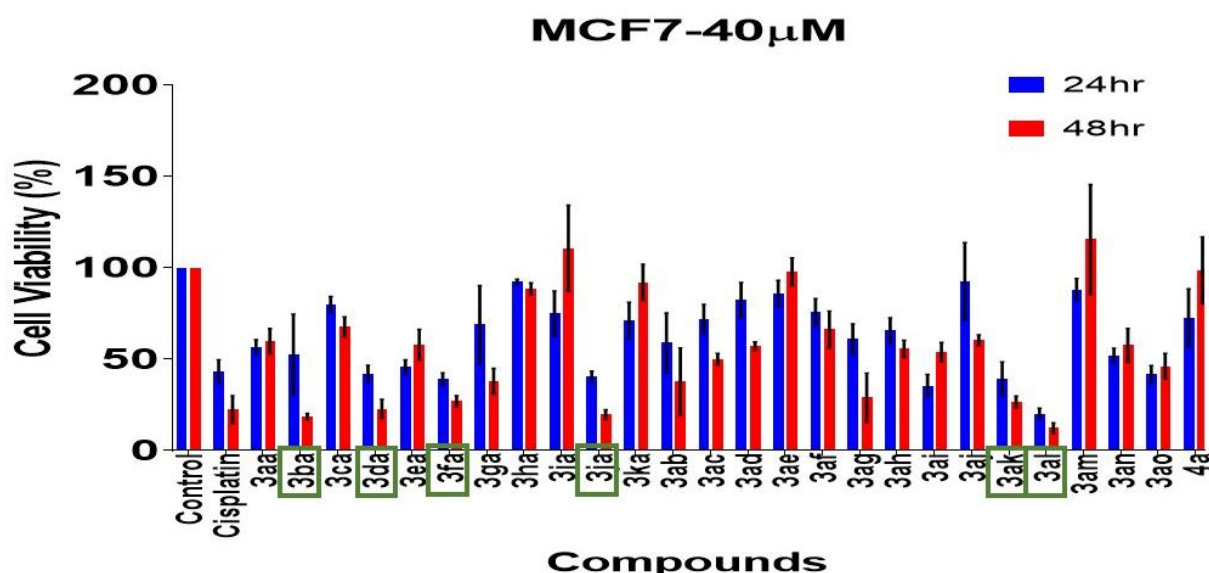

**FigureS2**-Cytotoxicity screening of synthesised indolizine derivatives (3aa-3ka, 3ab-3ao, 4a) against MCF-7 cells.

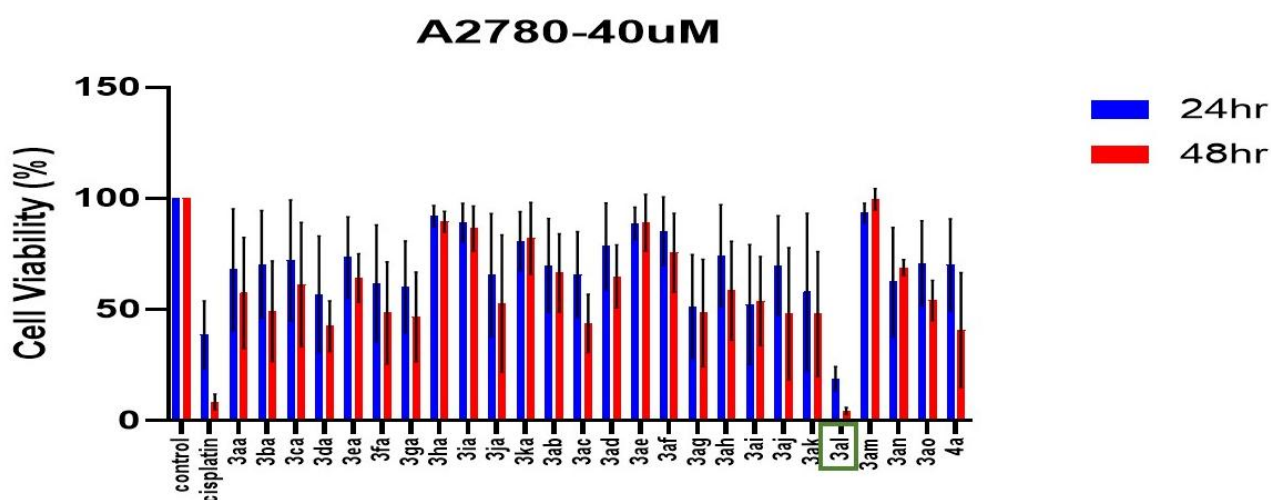

**Figure S3**-Cytotoxicity screening of synthesised indolizine derivatives (**3aa-3ka, 3ab-3ao, 4a**) against A2780 cells.

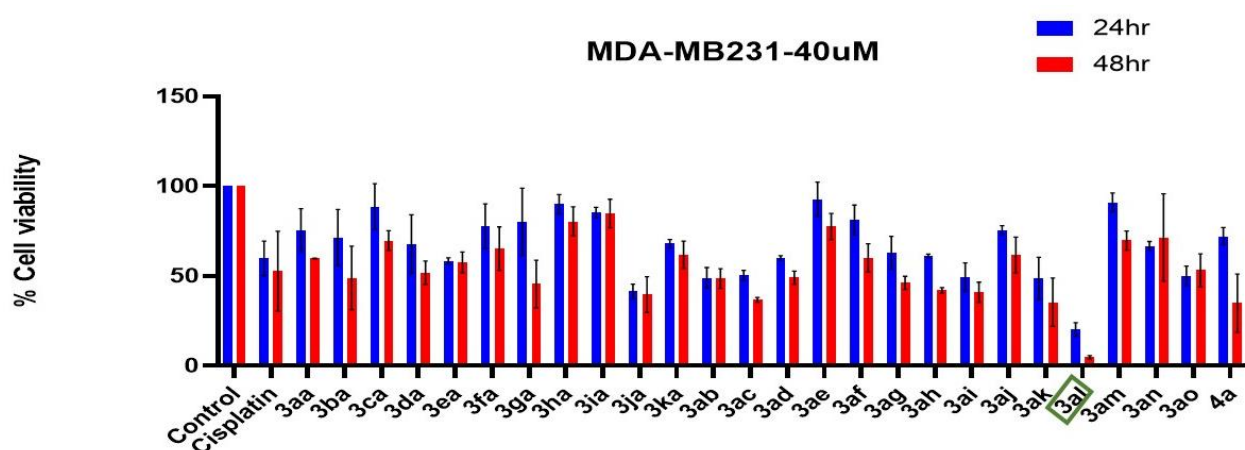

**Figure S4**-Cytotoxicity screening of synthesised indolizine derivatives (**3aa-3ka, 3ab-3ao, 4a**) against MDA-MB-231 cells.

## 6.2 IC<sub>50</sub> Determination

The Identified hit compounds from the preliminary screening were tested for IC<sub>50</sub> against the selected cancer and non-cancerous cell lines. MCF-7, MDA-MB-231, and A2780, MCF-10A cells were seeded in 96-well plates at a density of 5,000 cells per well and cultured in a 5% CO<sub>2</sub> incubator. Once the cells have attached to the plate the medium was replaced with serum-free medium and cells were subjected to serum starvation overnight. After 12–16 hours, the serum-free medium was replaced with treatment medium with a series of graded concentrations of each identified hit compound, and cells were incubated for 24 and 48 hours under standard culture conditions. At the designated time points, cell viability was evaluated using the Alamar Blue fluorometric assay. The reagent was incubated for 3–4 hours and fluorescence intensity was recorded at an excitation/emission wavelength

of 560/590 nm using the Varioskan Lux Multimode Microplate Reader. IC<sub>50</sub> was determined using GraphPad Prism (version 8.0).

(The IC<sub>50</sub> values of hit compounds against MCF-7 cells at 48h incubation were represented in figure-1(A) of main article. The remaining data has been presented here).

#### IC<sub>50</sub> on MCF7 cells (for 3al, 24h incubation)

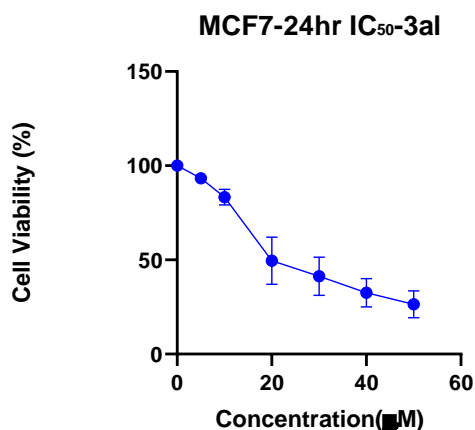

**Figure S5-** Dose dependent inhibition curve of **3al** against MCF-7 cells. IC<sub>50</sub> of 3al on MCF7 Cell line at 24 h [IC<sub>50</sub> (μM) : 15.44±1.68].

#### IC<sub>50</sub> on A2780 and MDA MB-231

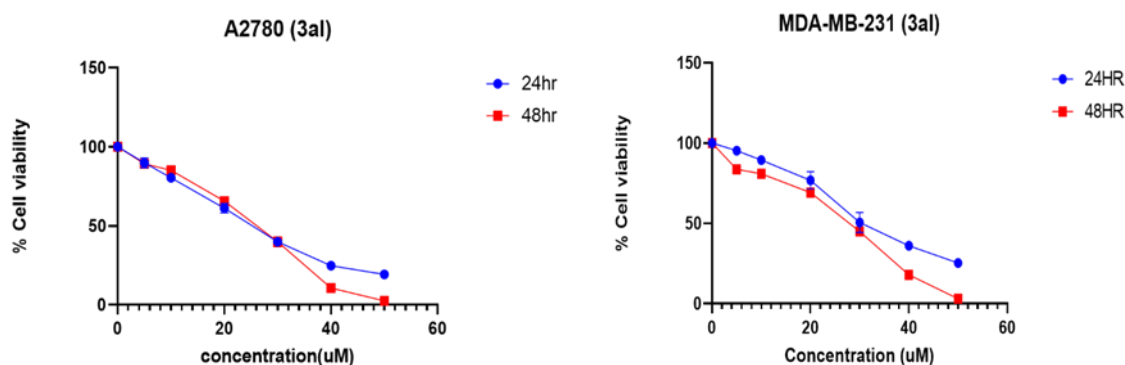

| Cell Line  | IC <sub>50</sub> (μM±SEM) | IC <sub>50</sub> (μM±SEM) |
|------------|---------------------------|---------------------------|
|            | 24 h                      | 48 h                      |
| A2780      | 17.98±1.69                | 23.55±0.43                |
| MDA-MB-231 | 24.26±2.36                | 24.30±1.26                |

**Figure S6-** Dose dependent inhibition curve of **3al** against A2780 and MDA-MB-231 cells.

## Effect of compound 3al on MCF10a (non-cancerous cell line)

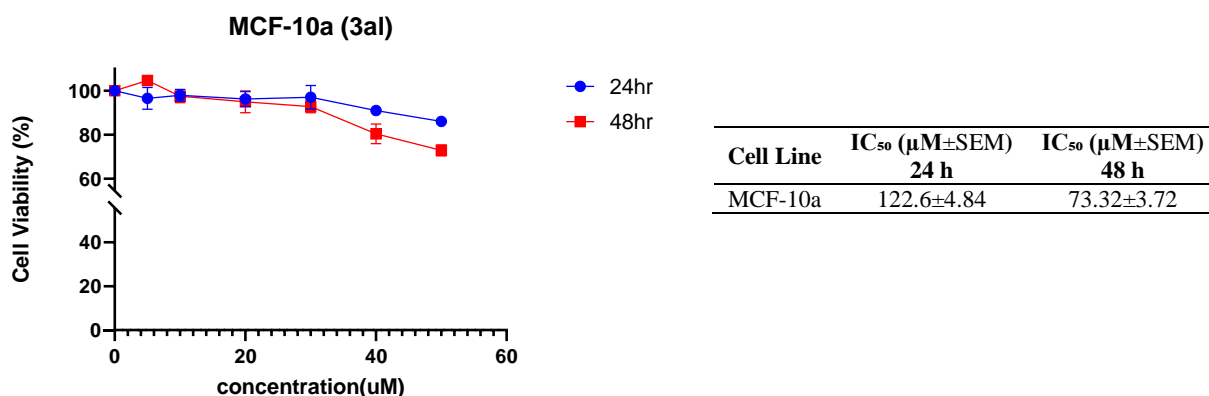

**Figure S7-** Cytotoxicity evaluation (at 40μM) and dose dependent inhibition curve of **3al** against MCF-10a cells.

### 6.3 Cell Migration Assay (Scratch Assay)

MCF-7 cells were seeded at a density of  $0.25 \times 10^6$  cells per well in 12-well plates and incubated overnight under standard culture conditions to allow complete cell adhesion and monolayer formation. The following day, the culture medium was removed cell monolayer was gently washed with 1X PBS . A uniform linear wound was made across each well using a 10 μL pipette tip, followed by an additional wash with 1X PBS to remove detached cells. Further, cells were subsequently treated with the respective compound at its IC<sub>50</sub> concentration and incubated for up to 72 hours. Images of the scratch wounds were captured at same positions at 0, 24, 48, and 72 hours using a fluorescence inverted microscope . The acquired images were analyzed using ImageJ software to quantify the cell-free area at each time point, and the resulting data were analyzed and represented using GraphPad Prism (version 8.0).

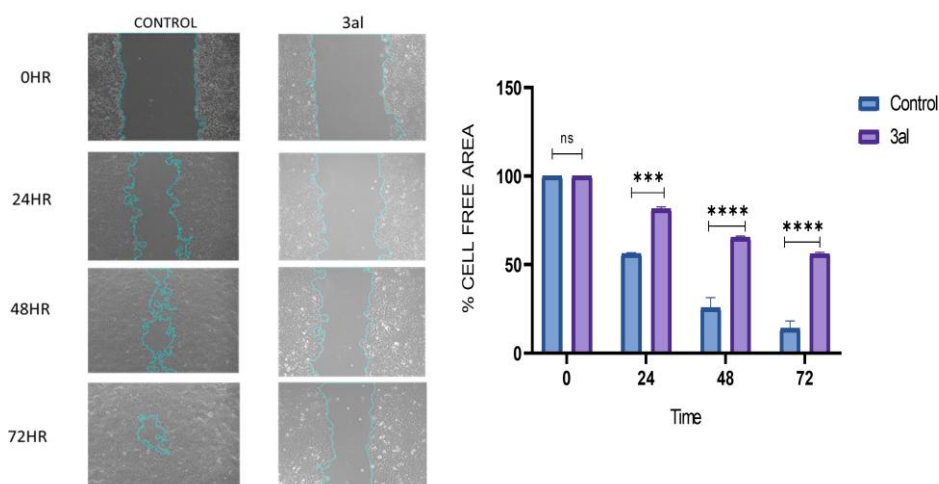

**Figure S8-** Effect of **3al** on MCF-7 cells migration. Compound **3al** significantly inhibited the migration of MCF-7 cells, demonstrating anti migratory potential.

## 6.4 Colony Forming Assay

MCF-7 cells were seeded at a density of 1,000 cells per well in 6-well plates and incubated for 24 hours under standard culture conditions to allow adequate cell adhesion. Following the initial incubation period, the culture medium was replaced with the treatment of compounds **3al** at its IC<sub>50</sub> concentration, and incubated for 24 hours. After completion of the treatment period, the medium was removed and the wells were washed with 1X PBS, followed by the addition of fresh complete medium. Cells were allowed to proliferate for 10–12 days. The media was changed every 2 days. After the incubation period, the medium was removed, and the wells were washed with 1X PBS. Colonies were fixed with absolute methanol for 15 minutes, followed by 1X PBS wash. The fixed colonies were stained with 0.5% crystal violet solution for 30 minutes followed by removal of stain the wells were thoroughly rinsed with Milli-Q water. The plates were air dried at room temperature, and colony counts were determined using ImageJ software.

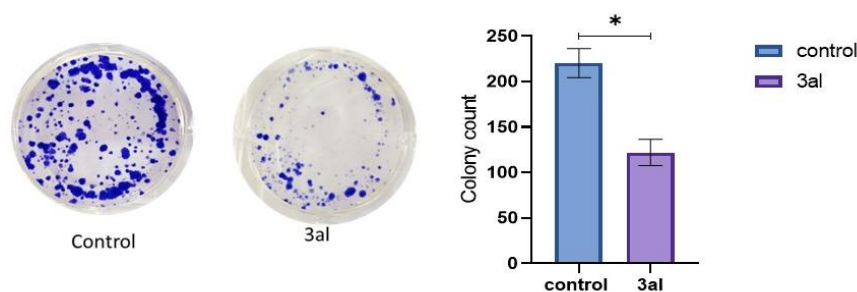

**Figure S9-** Effect of **3al** on MCF-7 Colony formation. Treatment with **3al** suppressed colony formation as compared to untreated controls indicating strong anti-proliferative effects.

## 6.5 Cell Cycle Assay

MCF-7 cells were seeded at a density of  $0.5 \times 10^6$  cells per well in 6-well plates and incubated overnight at 5 % CO<sub>2</sub> and 37°C. Next day, cells were treated with compound **3al** at IC<sub>50</sub> concentration and incubated for 24 hours. Then cells were trypsinized and collected by centrifugation at  $200 \times g$  for 7 minutes. The resulting cell pellet was washed with ice-cold 1X PBS, after which 70% ethanol was added dropwise with gentle vortexing to facilitate fixation, and the cells were kept on ice for 30 minutes to ensure complete fixation. Following fixation, cells were centrifuged at  $800 \times g$  for 5 minutes, washed with ice-cold 1X PBS, and centrifuged again at  $200 \times g$  for 7 minutes. The cell pellet was then resuspended in 50  $\mu$ L of RNase A (100 $\mu$ g/ml) and incubated at 37°C for 30 minutes to eliminate RNA interference. Further, cells were stained with 200  $\mu$ L of propidium iodide at a concentration of 50  $\mu$ g/mL, transferred to FACS tubes, and analyzed using a flow cytometer. The percentage of cells in the G<sub>0</sub>/G<sub>1</sub>, S, and G<sub>2</sub>/M phases of the cell cycle was determined by analyzing the acquired data using FACS Express software.

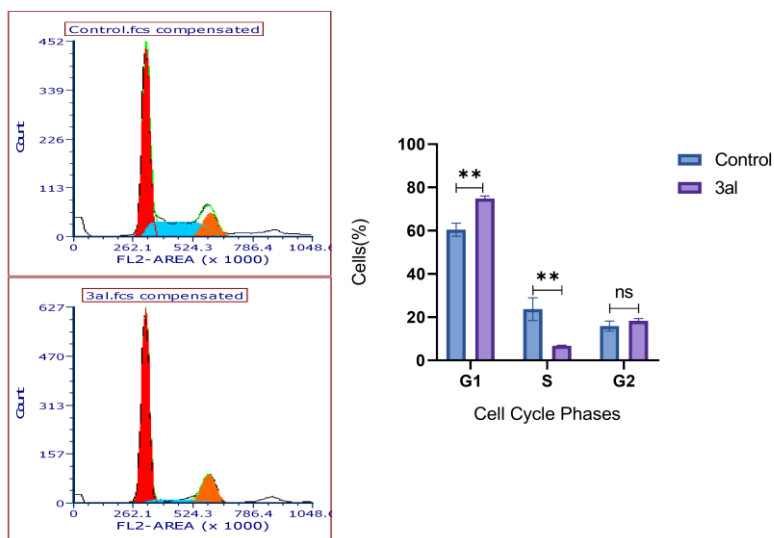

**Figure S10-** Cell cycle analysis in MCF-7 cells following treatment with compound **3a1**.

### 6.6 Apoptosis Assay

MCF-7 cells were seeded at a density of  $0.5 \times 10^6$  cells per well in 6-well plates and incubated overnight under standard culture conditions. Next day cells were treated with compound **3a1** at  $IC_{50}$  concentration and incubated for 24 hours. Then cells were trypsinized and collected by centrifugation at  $200 \times g$  for 7 minutes, followed 1X PBS washes with centrifugation at  $200 \times g$  for 7 minutes. Then the resulting cell pellet was resuspended in 195  $\mu$ L of 1X binding buffer. Annexin V (5  $\mu$ L) was added to the cell suspensions and incubated for 15 minutes at room temperature in the dark conditions. After incubation cells were centrifuged at  $200 \times g$  for 5 minutes, the supernatant was discarded, and the pellet was carefully resuspended in 195  $\mu$ L of 1X binding buffer. Before acquisition, 5  $\mu$ L of propidium iodide (PI) was added to the treated samples, and all samples were immediately analysed using a flow cytometer to distinguish between viable, early apoptotic, late apoptotic, and necrotic cell populations.

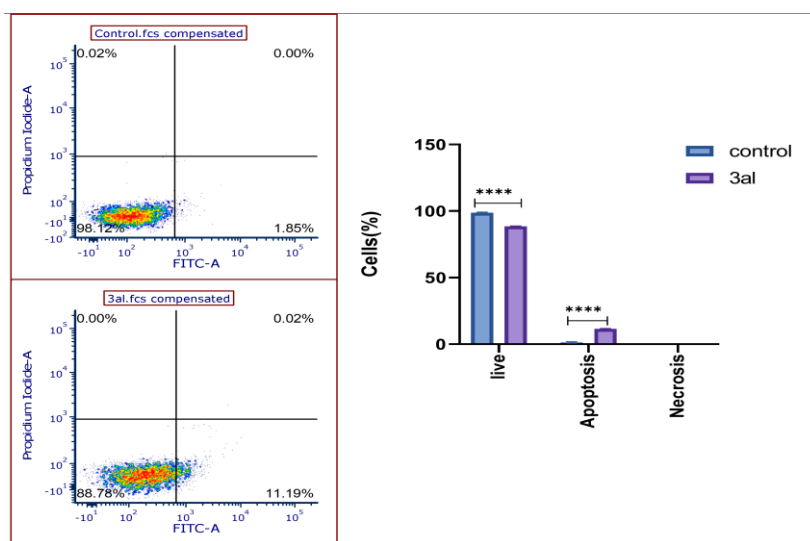

**Figure S11-** Annexin V-based flow cytometric detection of apoptosis induction by compound **3a1**.

## 7. References

- (1) Y. Liu, H. Hu, J. Zhou, W. Wang, Y. He and C. Wang, *Org. Biomol. Chem.*, 2017, **15**, 5016.
- (2) L. Zhang, F. Liang, L. Sun, Y. Hu and H. Hu, *Synth.*, 2000, **2000**, 1733.
- (3) (a) X. Feng, J. Tian, Y. Sun, H. Hu, M. Lu, Y. Kan, D. Fang and C. Wang, *Chin. Chem. Lett.*, 2021, **32**, 470. (b) H. Hu, Y. Liu, J. Xu, Y. Kan, C. Wang and M. Ji, *RSC Adv.*, 2014, **4**, 24389. (c) F. Shi, Y. Zhang, Z. Lu, X. Zhu, W. Kan, X. Wang and H. Hu, *Synth.*, 2016, **48**, 413.
- (4) O. V. Dolomanov, L. J. Bourhis, R. J. Gildea, J. A. K. Howard and H. Puschmann, *J. Appl. Cryst.*, 2009, **42**, 339.
- (5) G. M. Sheldrick, *Acta Crystallogr. A*, 2015, **71**, 3.
- (6) G. Sheldrick, *Acta Crystallogr. C*, 2015, **71**, 3.
- (7) R. Hamid, Y. Rotshteyn, L. Rabadi, R. Parikh and P. Bullock, *Toxicology in Vitro*, 2004, **18**, 703.
- 

### NMR Spectra Notes:

In  $^{13}\text{C}\{^1\text{H}\}$  spectra of compounds, the methyl peaks of N,N dimethyl carbamoyl group, is either diminished or missing. This could be attributed due to amides inherent transient fluxional character, i.e the double bond character arises from the resonance structure of amides as shown below (W. E. Stewart, T. H. Siddall, Nuclear magnetic resonance studies of amides, *Chem. Rev.* 1970, **70**, 5, 517–551) and probably due to  $T_2$  shortening and exchange broadening (H. S. Gutowsky, and C. H. Holm, Rate Processes and Nuclear Magnetic Resonance Spectra. II. Hindered Internal Rotation of Amides *J. Chem. Phys.* 1956, **25**, 1228–1234).

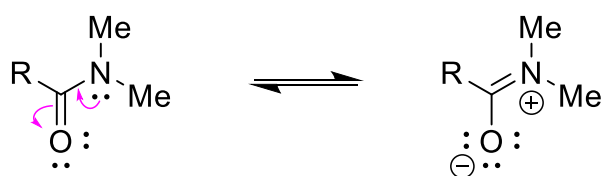

## 8. $^1\text{H}$ and $^{13}\text{C}\{^1\text{H}\}$ & $^{19}\text{F}$ NMR Spectra of synthesised starting materials.

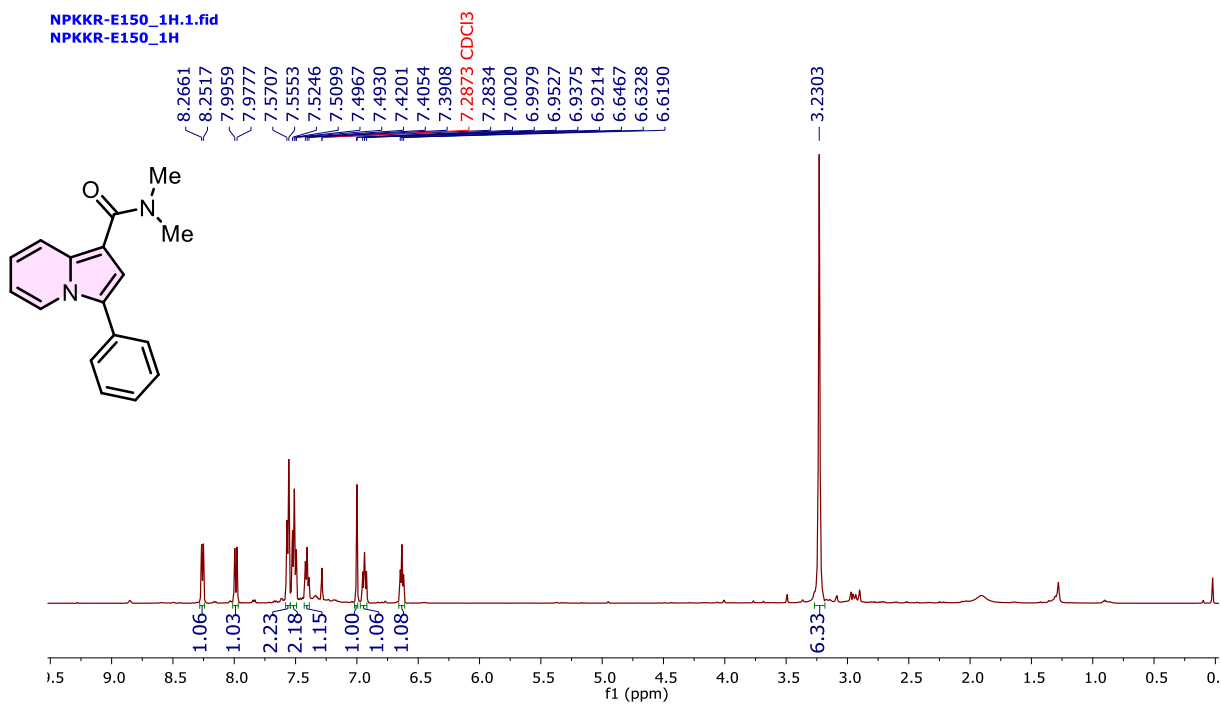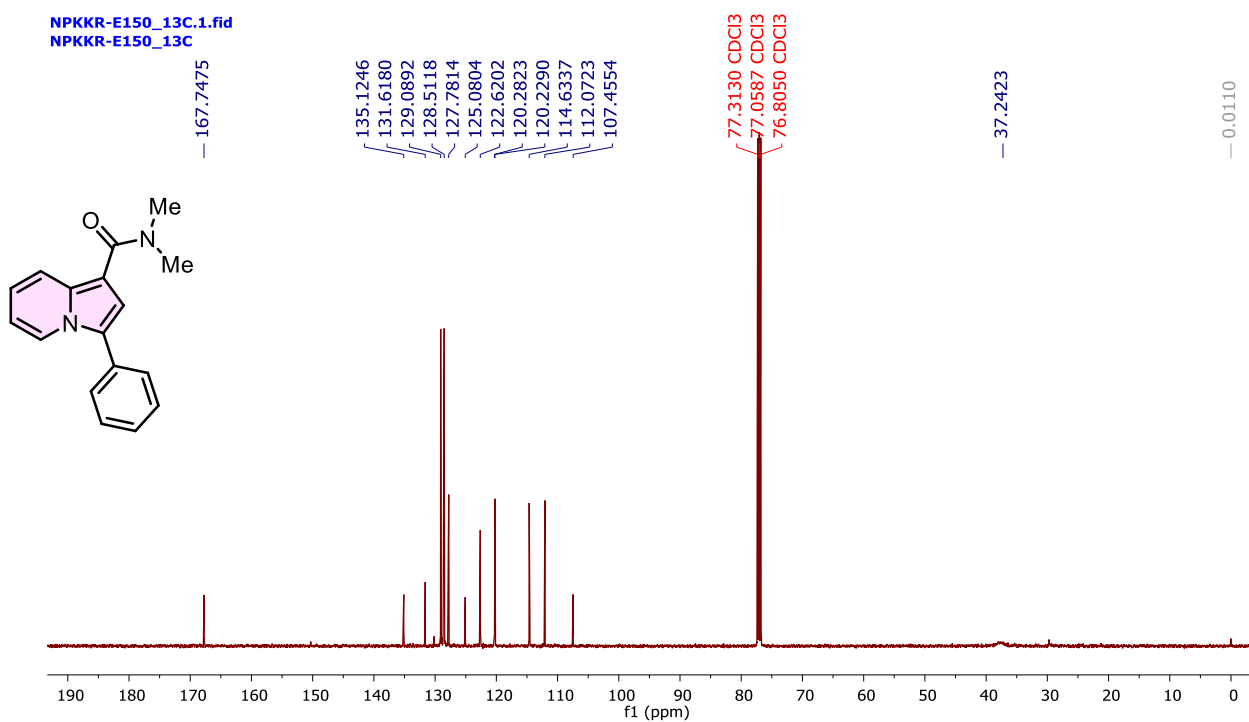

NPKKR-E48.1.fid  
NPKKR-E48

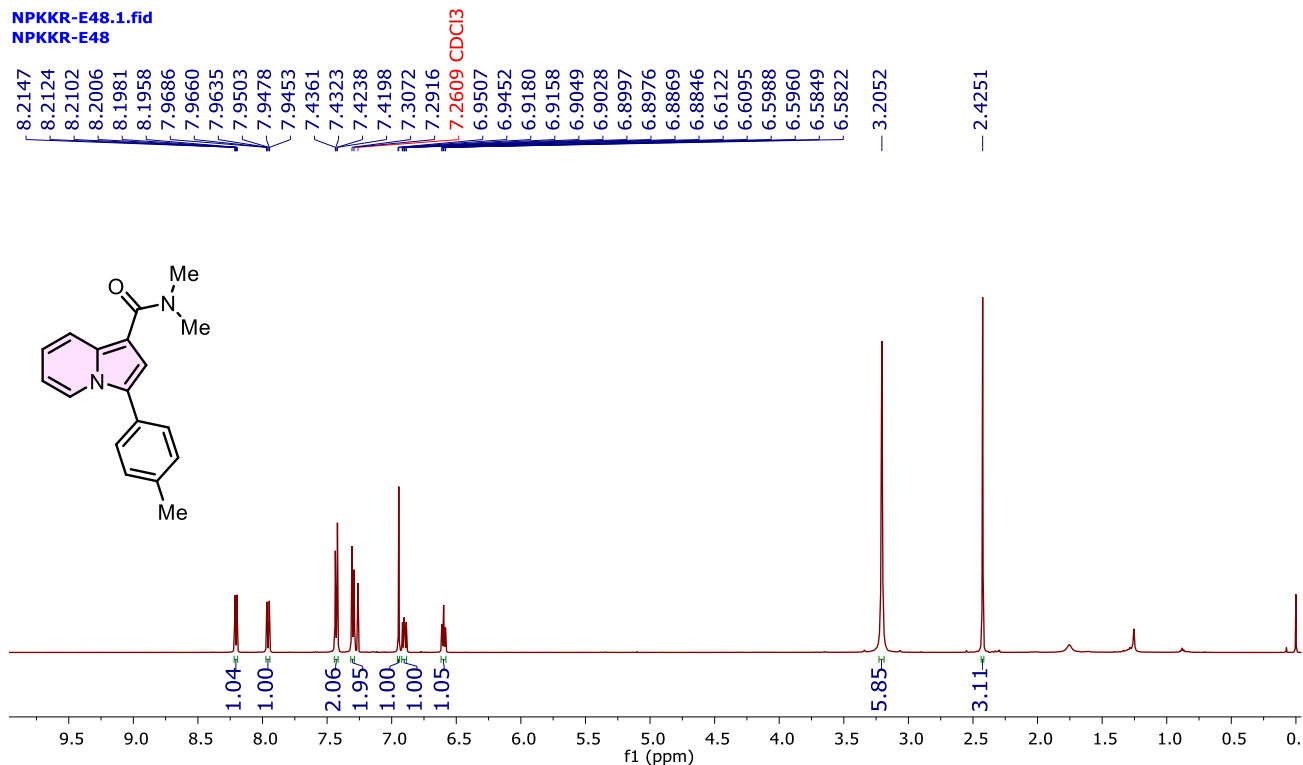

<sup>1</sup>H-NMR (500 MHz, CDCl<sub>3</sub>) of N,N-Dimethyl-3-(p-tolyl)indolizine-1-carboxamide (**1b**)

NPKKR-E48 13C.1.fid  
NPKKR-E48

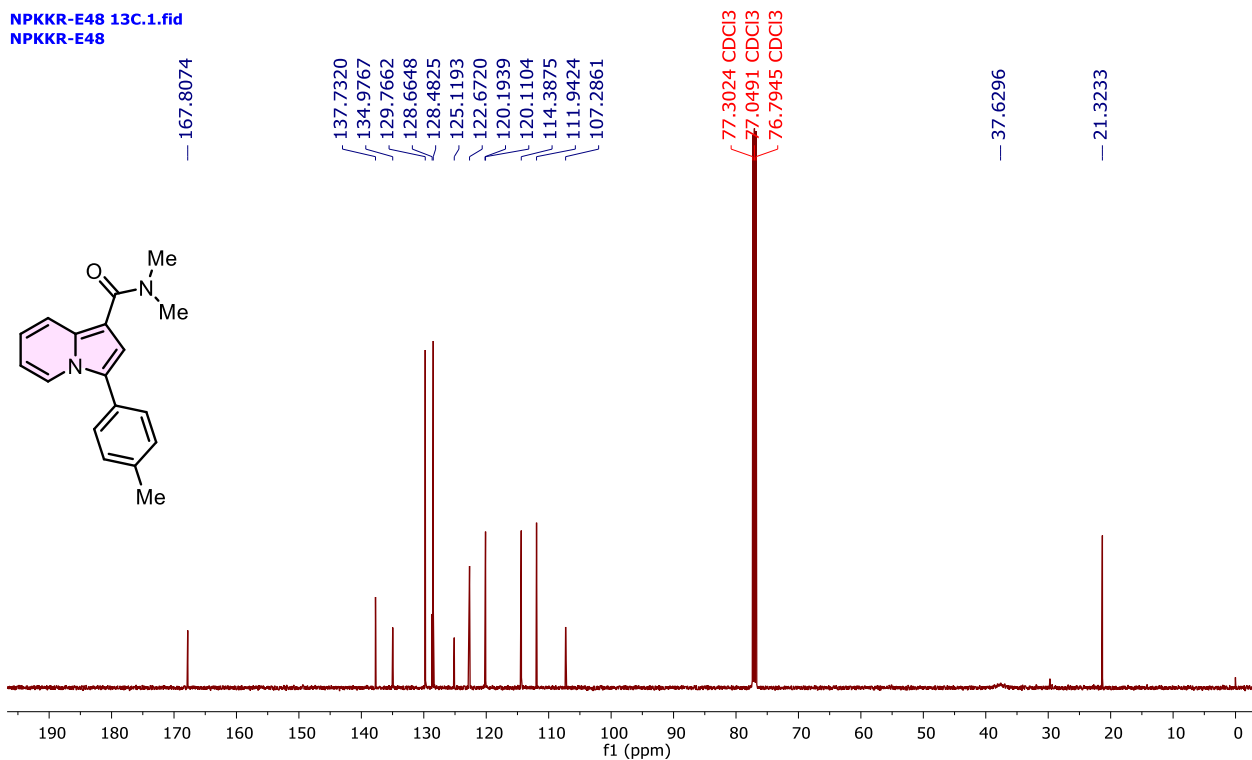

<sup>13</sup>C{<sup>1</sup>H}-NMR (125 MHz, CDCl<sub>3</sub>) of N,N-Dimethyl-3-(p-tolyl)indolizine-1-carboxamide (**1b**)

NPKKR-V3 1H.1.fid  
NPKKR-V3 1H

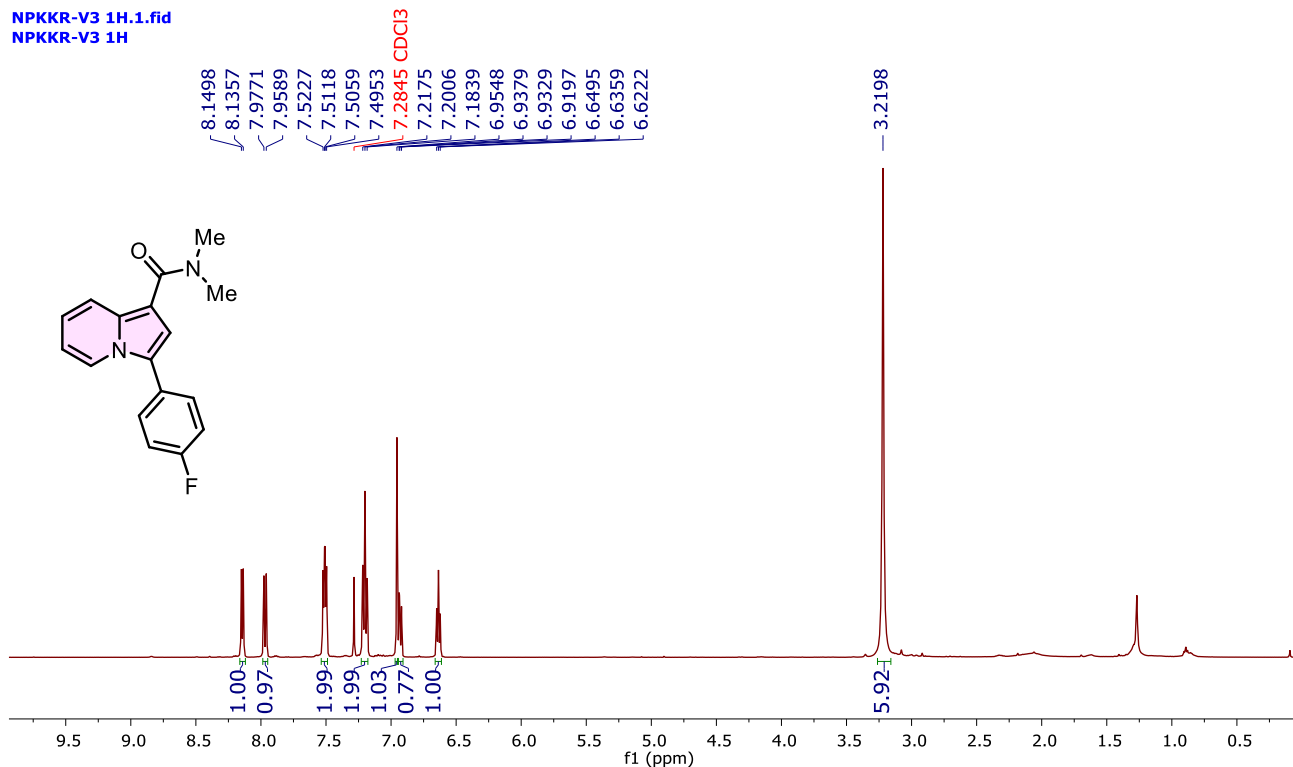

<sup>1</sup>H-NMR (500 MHz, CDCl<sub>3</sub>) 3-(4-Fluorophenyl)-N,N-dimethylindolizine-1-carboxamide. (1c)

NPKKR-V3 13C.1.fid  
NPKKR-V3 13C

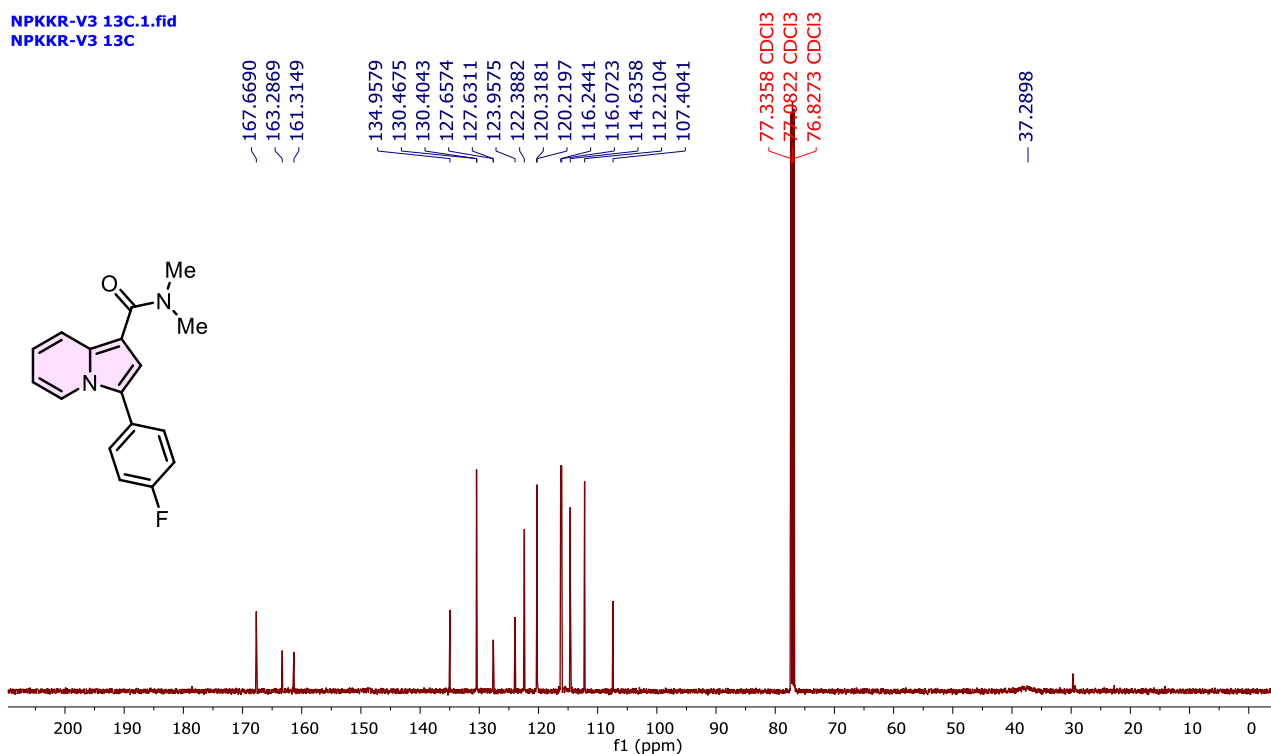

<sup>13</sup>C-NMR (125 MHz, CDCl<sub>3</sub>) 3-(4-Fluorophenyl)-N,N-dimethylindolizine-1-carboxamide. (1c)

NPKKR-V3 19F.1.fid  
NPKKR-V3 19F

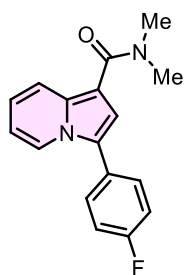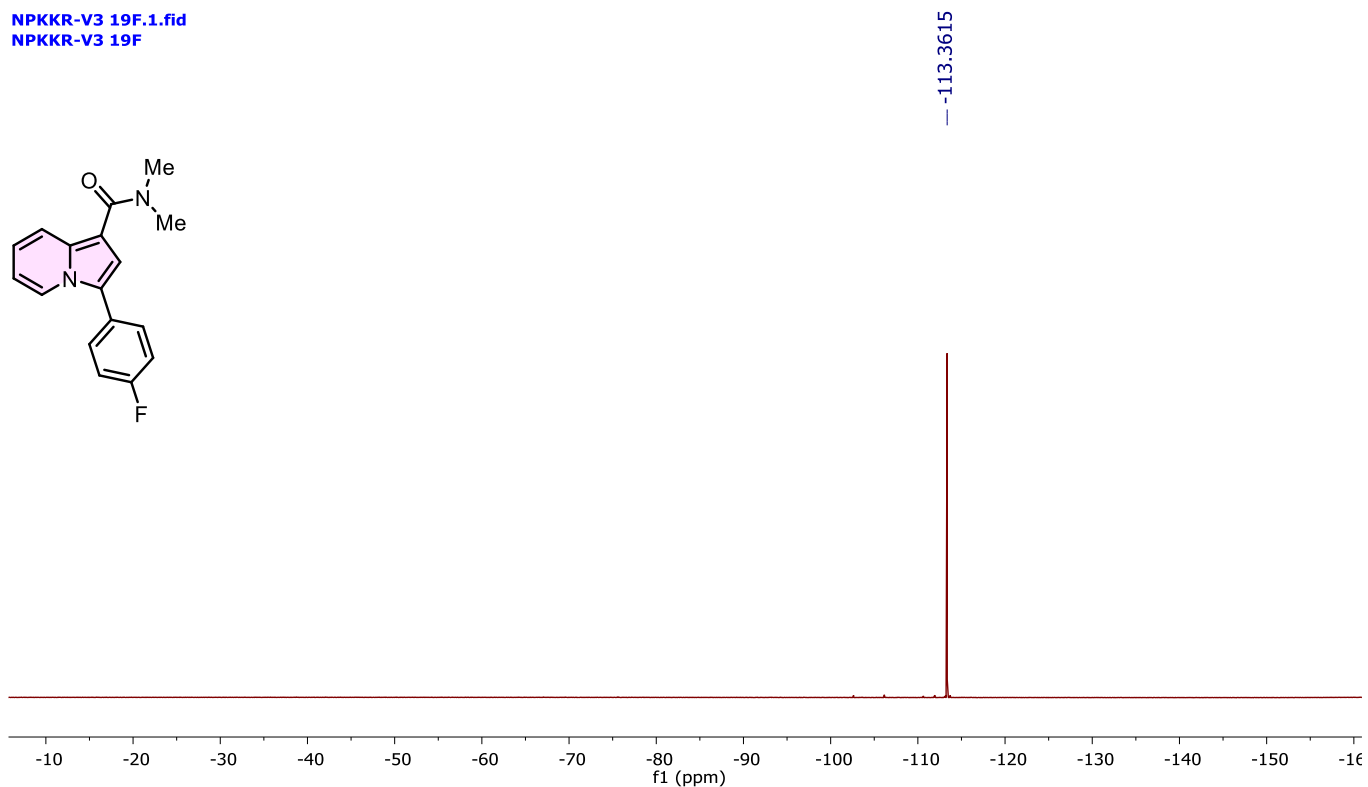

$^{19}\text{F}$ -NMR (470 MHz,  $\text{CDCl}_3$ ) of 3-(4-Fluorophenyl)-N,N-dimethylindolizine-1-carboxamide. (**1c**)

NPKKR-V4\_1H.1.fid  
NPKKR-V4\_1H

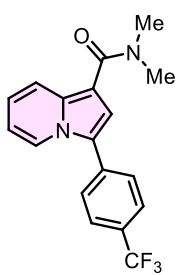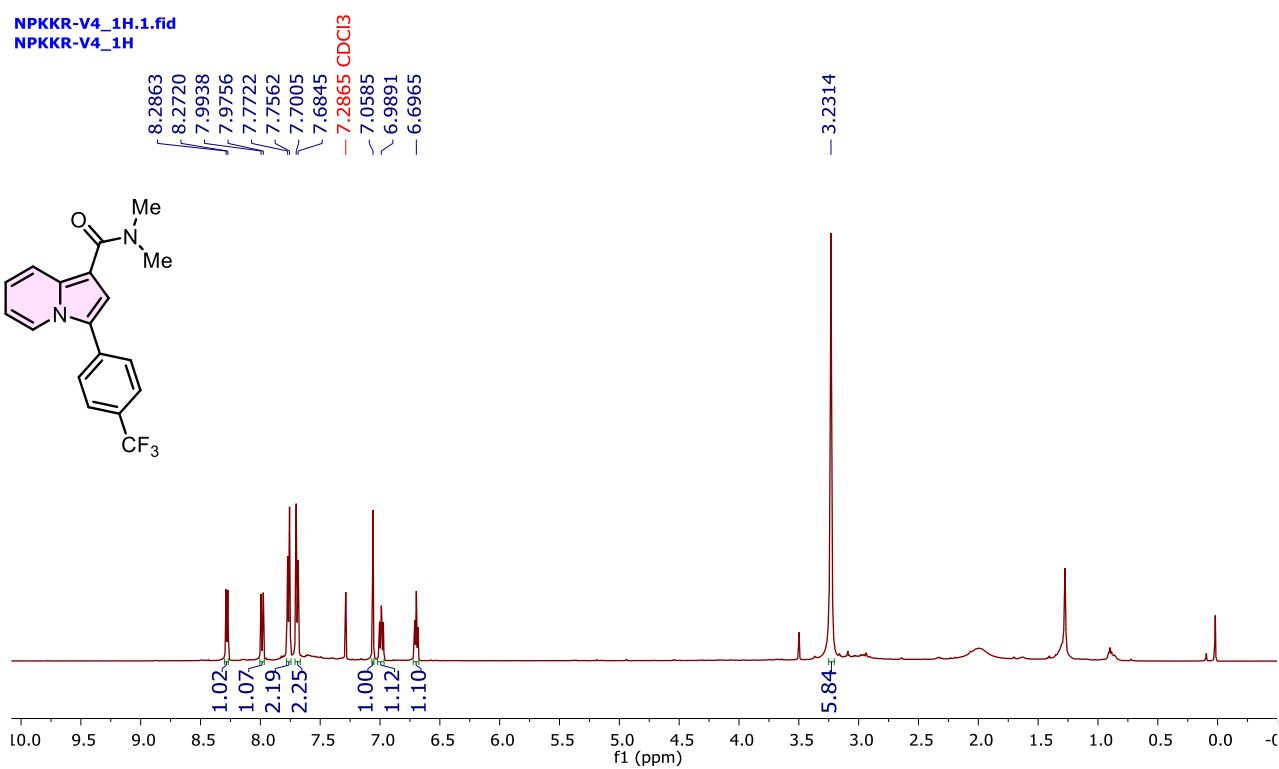

$^1\text{H}$ -NMR (500 MHz,  $\text{CDCl}_3$ ) of N,N-Dimethyl-3-(4-(trifluoromethyl)phenyl)indolizine-1-carboxamide (**1d**).

NPKKR-V4\_13C.1.fid  
NPKKR-V4\_13C

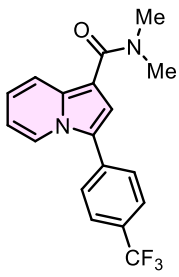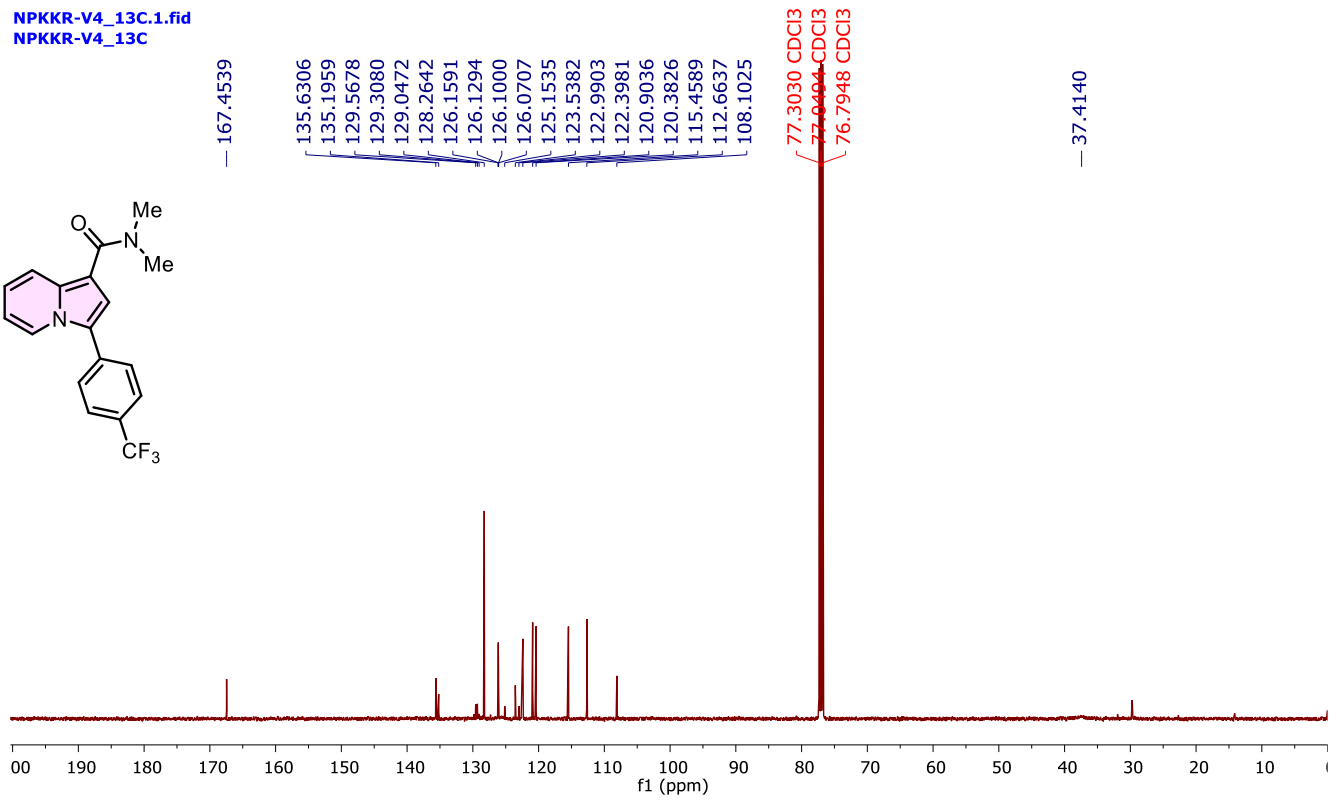

$^{13}\text{C}\{^1\text{H}\}$ -NMR (125 MHz,  $\text{CDCl}_3$ ) of N,N-Dimethyl-3-(4-(trifluoromethyl)phenyl)indolizine-1-carboxamide (**1d**).

NPKKR-V4\_19F.1.fid  
NPKKR-V4\_19F

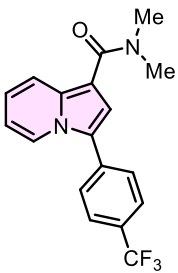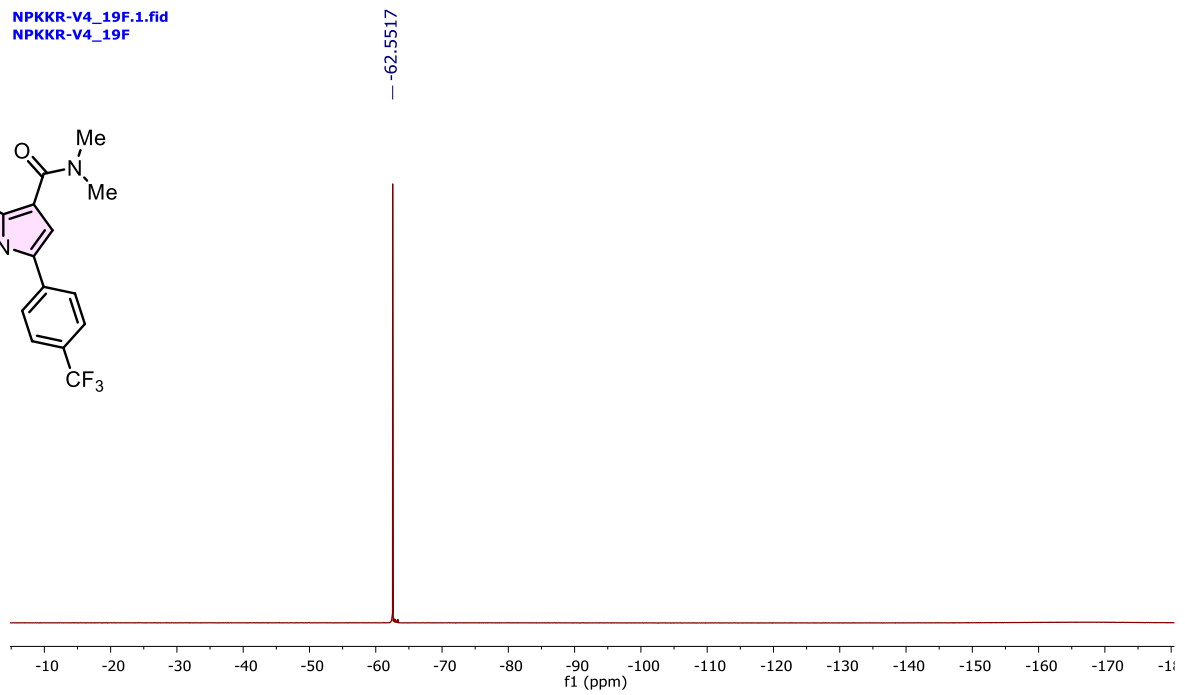

$^{19}\text{F}$ -NMR (470 MHz,  $\text{CDCl}_3$ ) of N,N-Dimethyl-3-(4-(trifluoromethyl)phenyl)indolizine-1-carboxamide (**1d**).

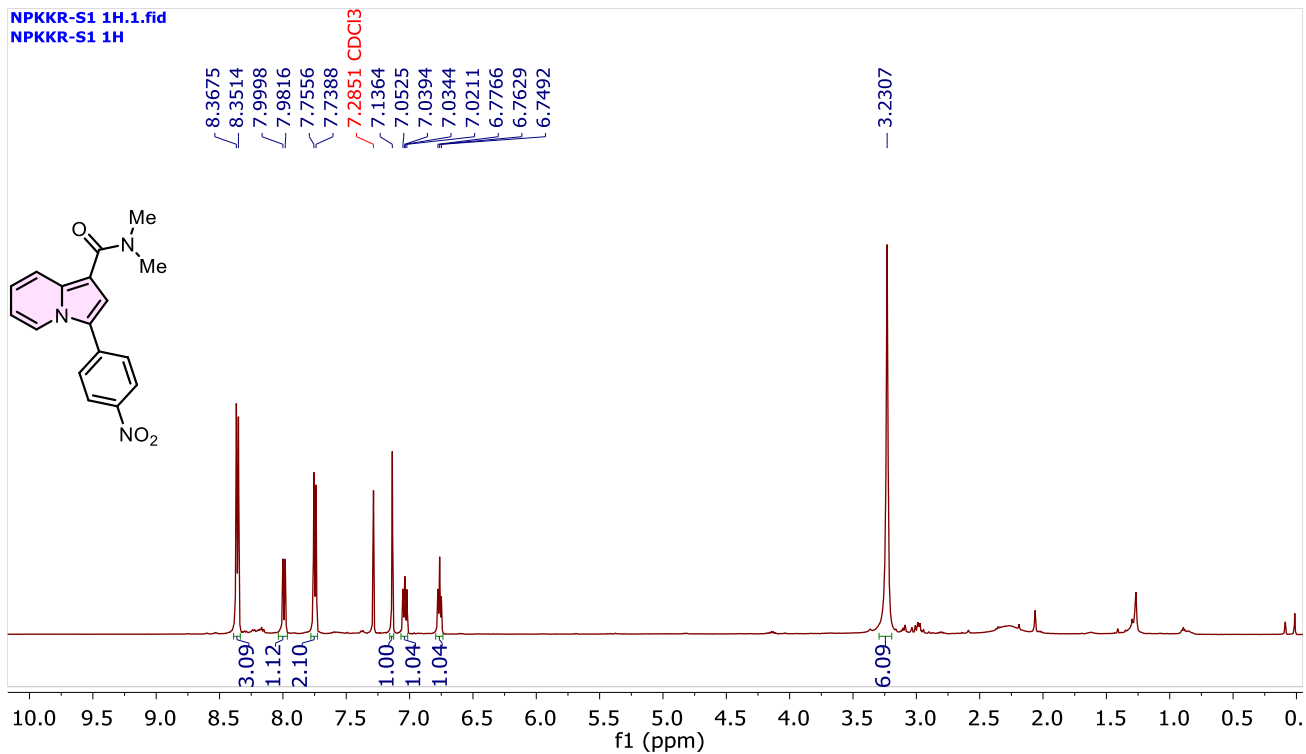

<sup>1</sup>H-NMR (500 MHz, CDCl<sub>3</sub>) of N,N-Dimethyl-3-(4-nitrophenyl)indolizine-1-carboxamide. (1e)

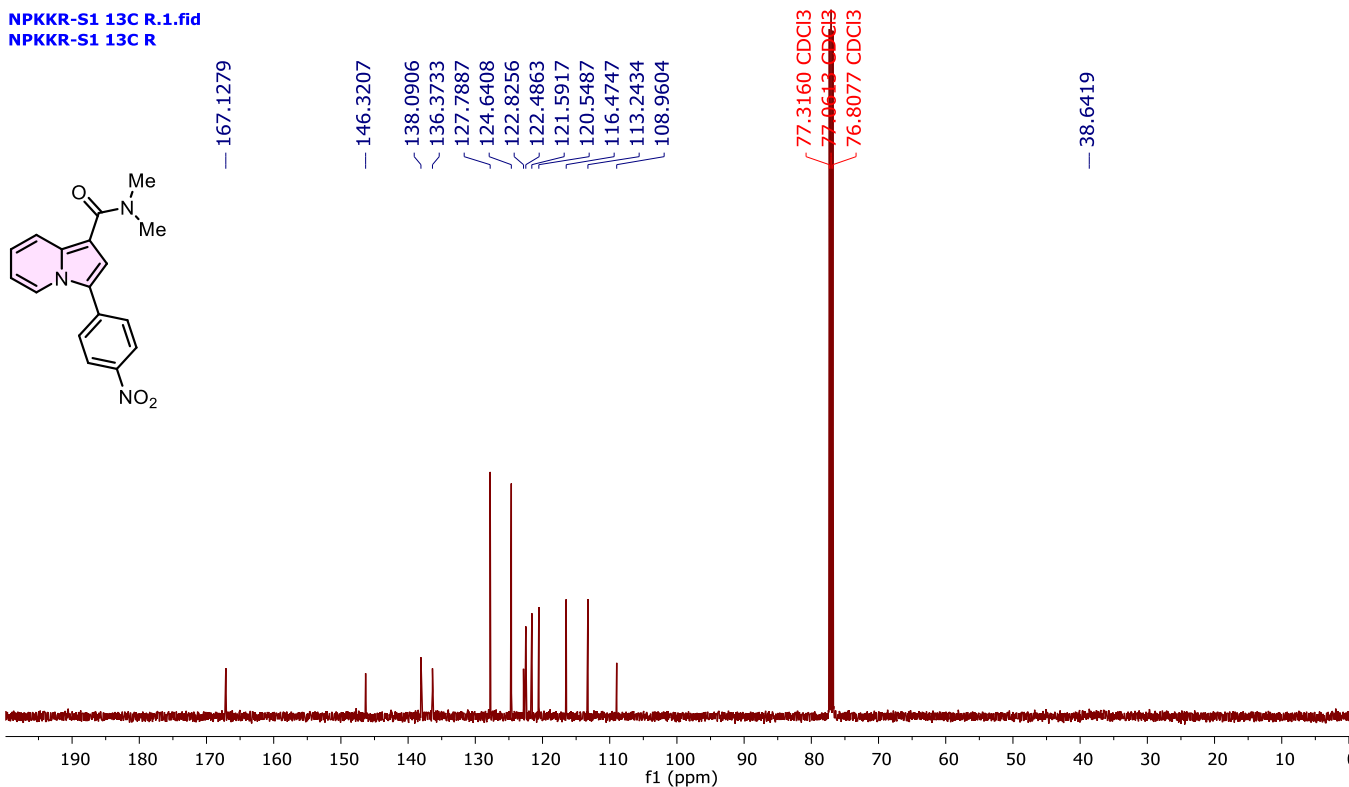

<sup>13</sup>C{<sup>1</sup>H} NMR (125 MHz, CDCl<sub>3</sub>) of N,N-Dimethyl-3-(4-nitrophenyl)indolizine-1-carboxamide. (1e)

NPKKR-V5\_1H.1.fid  
NPKKR-V5\_1H

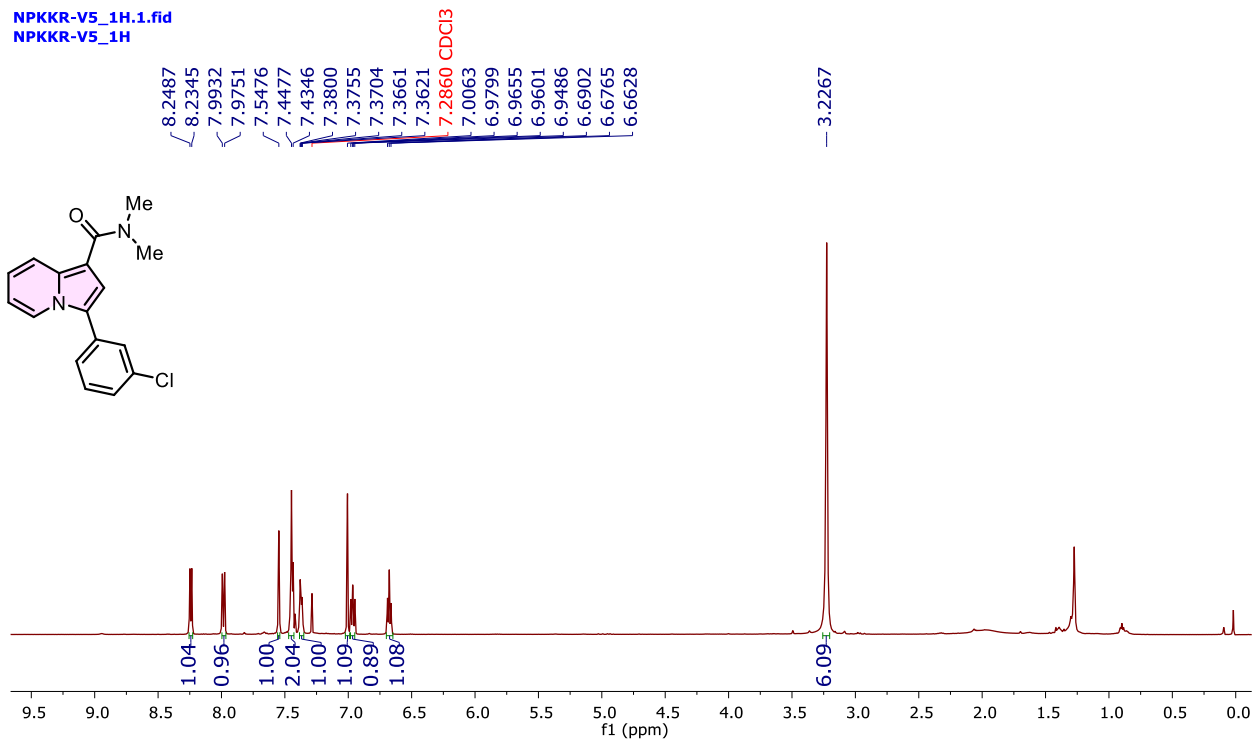

<sup>1</sup>H-NMR (500 MHz, CDCl<sub>3</sub>) of 3-(3-Chlorophenyl)-N,N-dimethylindolizine-1-carboxamide (**1f**).

NPKKR-V5\_13C.1.fid  
NPKKR-V5\_13C

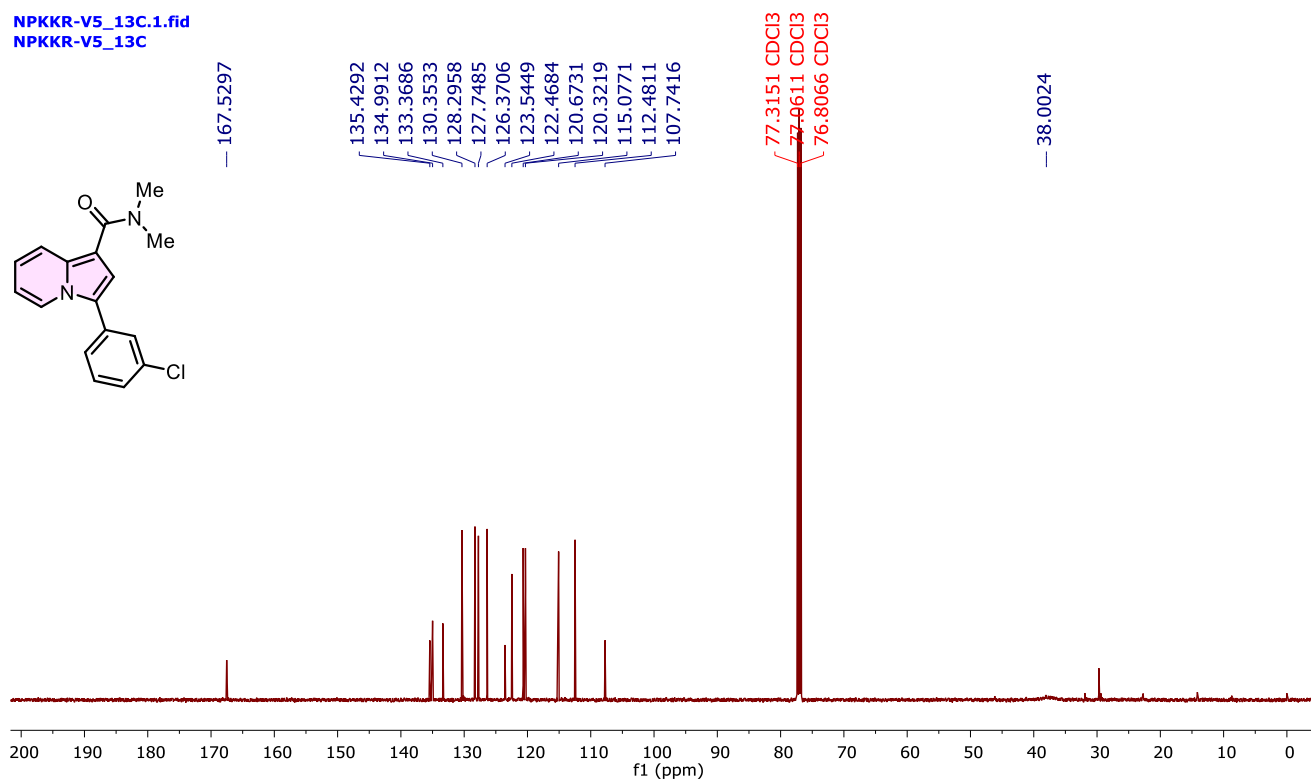

<sup>13</sup>C{<sup>1</sup>H}-NMR (125 MHz, CDCl<sub>3</sub>) of 3-(3-Chlorophenyl)-N,N-dimethylindolizine-1-carboxamide (**1f**).

NPKKR-S2\_1H.1.fid  
NPKKR-S2\_1H

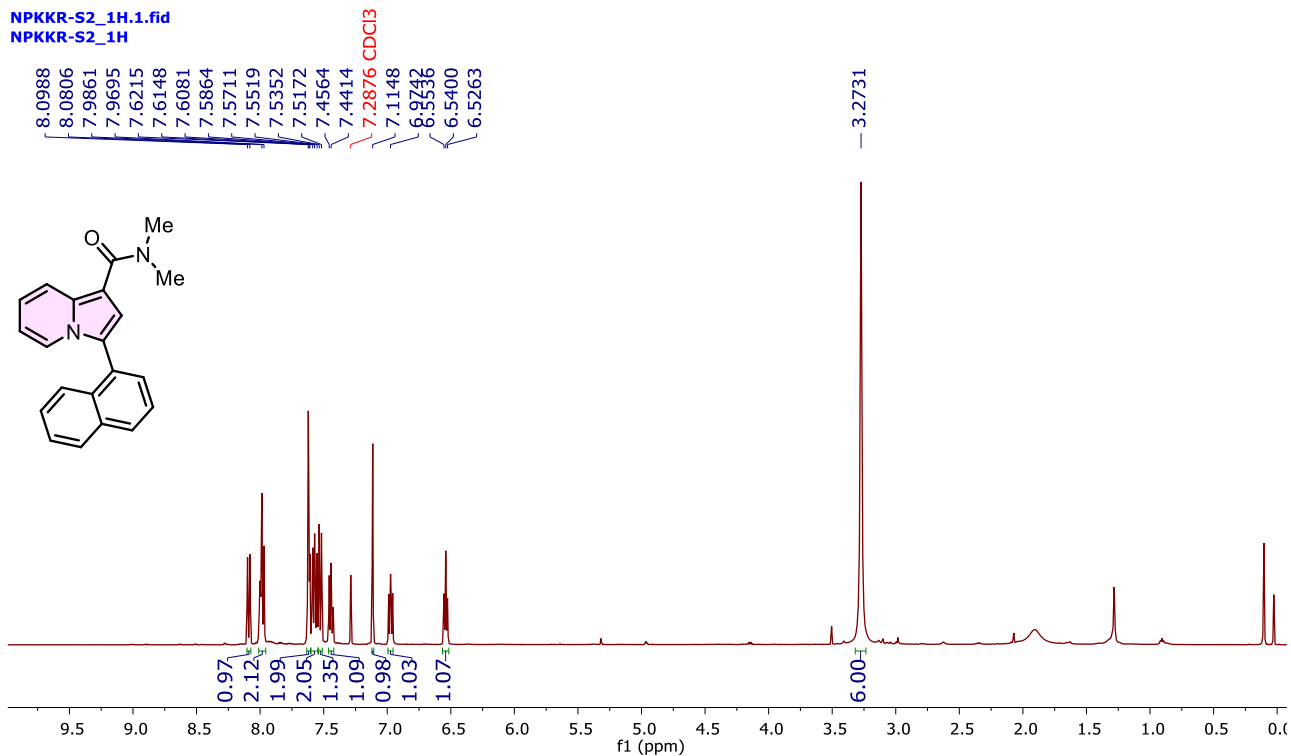

<sup>1</sup>H-NMR (500 MHz, CDCl<sub>3</sub>) of N,N-Dimethyl-3-(naphthalen-1-yl)indolizine-1-carboxamide (**1g**).

NPKKR-S2\_13C.1.fid  
NPKKR-S2\_13C

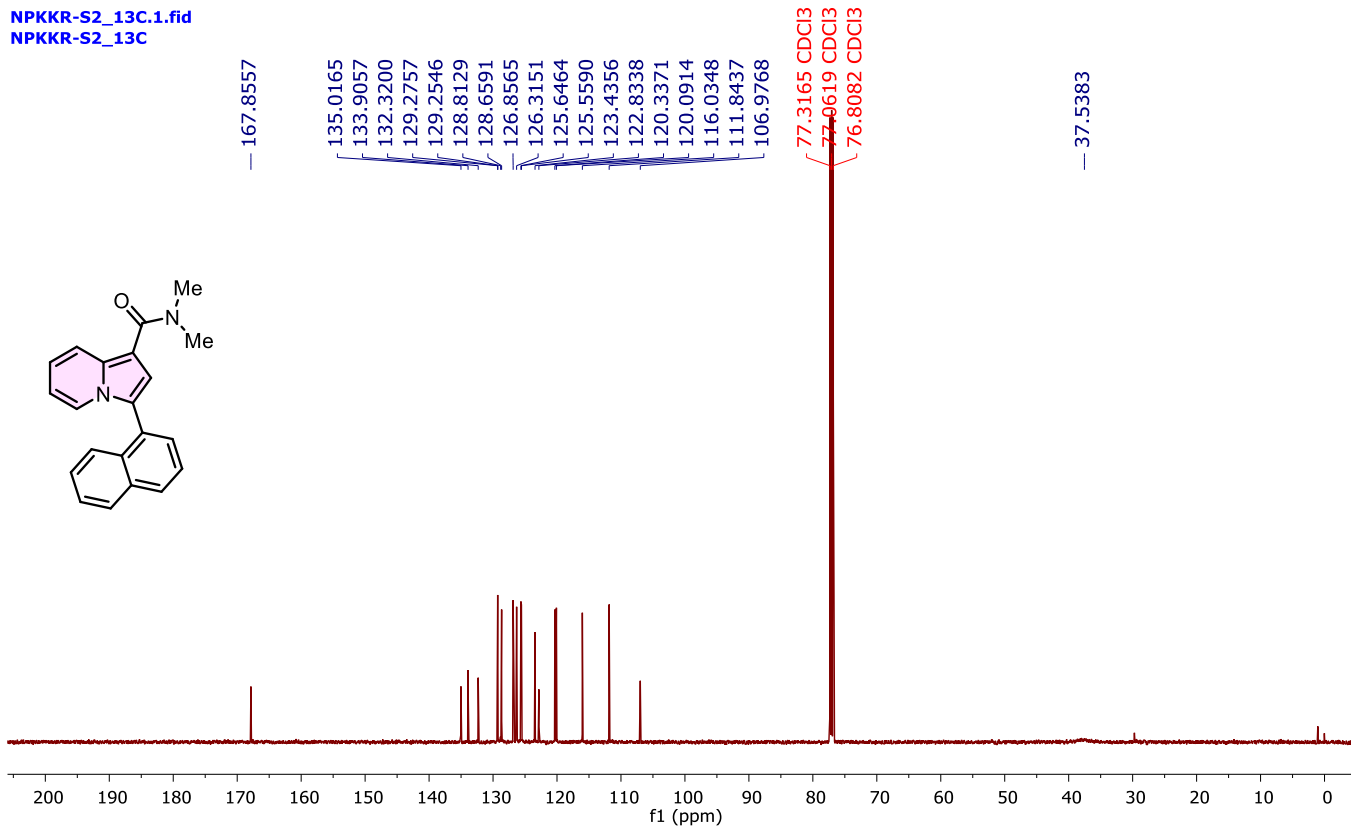

<sup>13</sup>C{<sup>1</sup>H}-NMR (125 MHz, CDCl<sub>3</sub>) of N,N-Dimethyl-3-(naphthalen-1-yl)indolizine-1-carboxamide (**1g**).

NPKKR-E45.1.fid  
NPKKR-E45

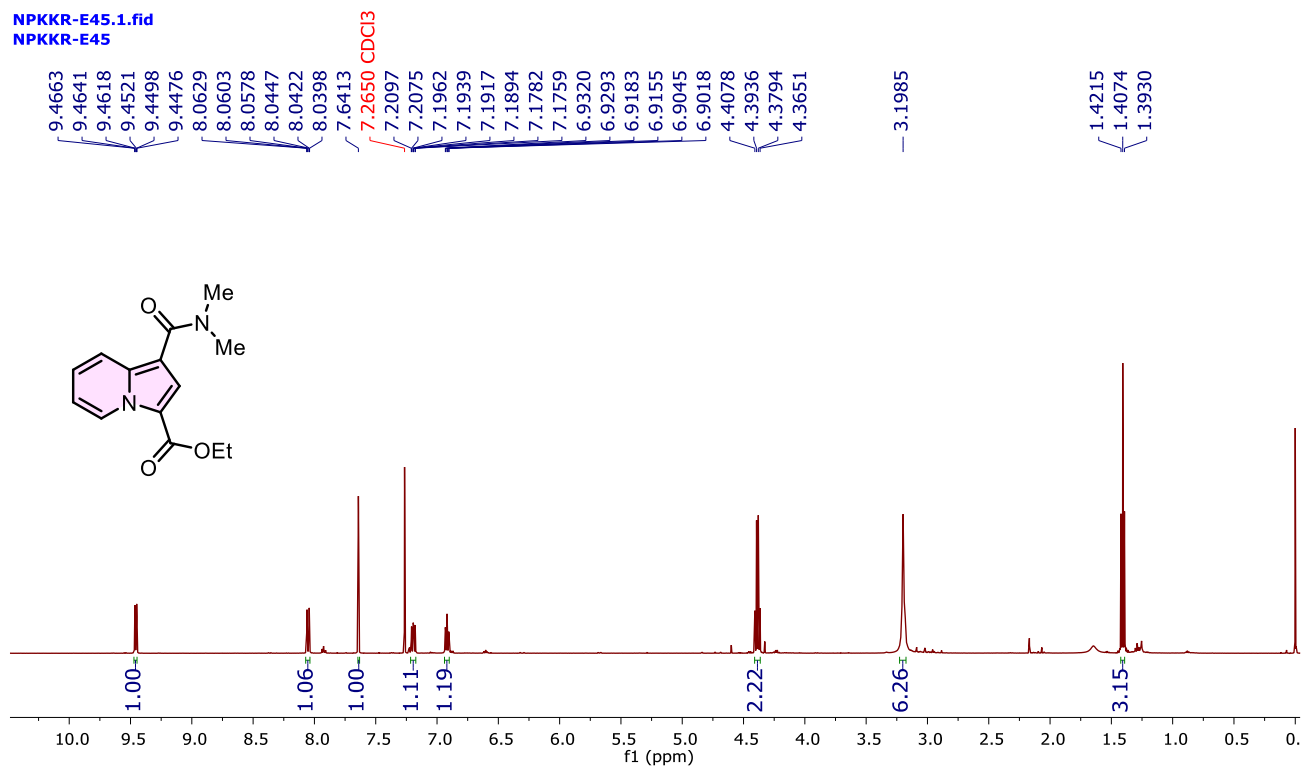

<sup>1</sup>H-NMR (500 MHz, CDCl<sub>3</sub>) of Ethyl 1-(dimethyl carbamoyl)indolizine-3-carboxylate. (1h)

NPKKR-E45 13C.1.fid  
NPKKR-E45

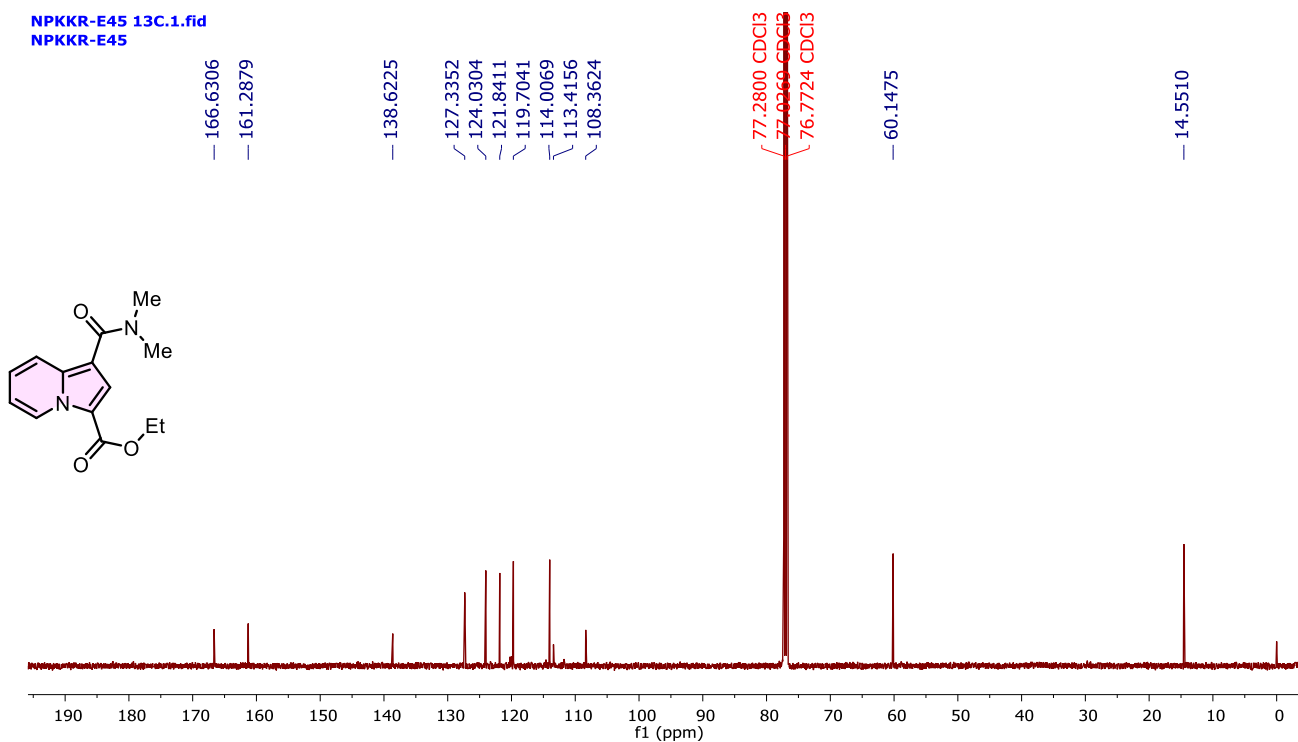

<sup>13</sup>C{<sup>1</sup>H}-NMR (125 MHz, CDCl<sub>3</sub>) of Ethyl 1-(dimethyl carbamoyl)indolizine-3-carboxylate. (1h)

NPKKR-2302307\_1H.1.fid  
NPKKR-2302307\_1H

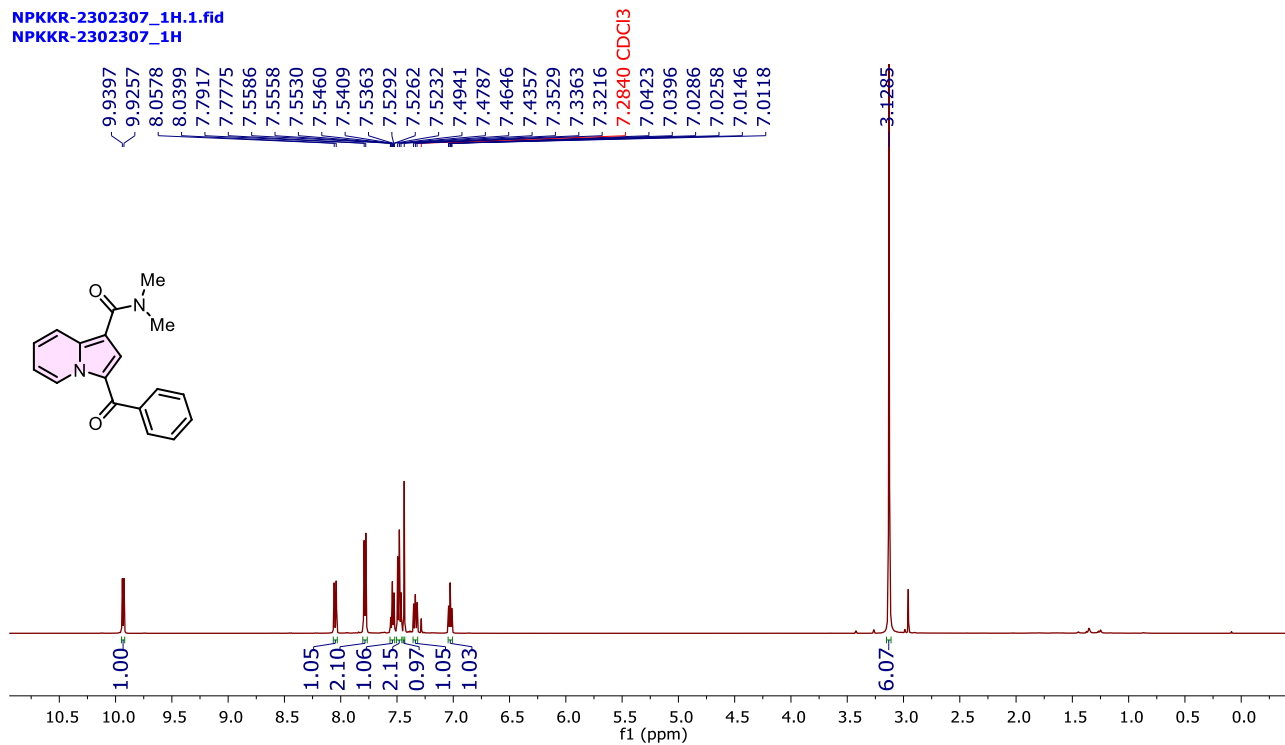

$^1\text{H-NMR}$  (500 MHz,  $\text{CDCl}_3$ ) of 3-Benzoyl-N,N-dimethylindolizine-1-carboxamide (**1i**).

NPKKR-2302307\_13C.1.fid  
NPKKR-2302307\_13C

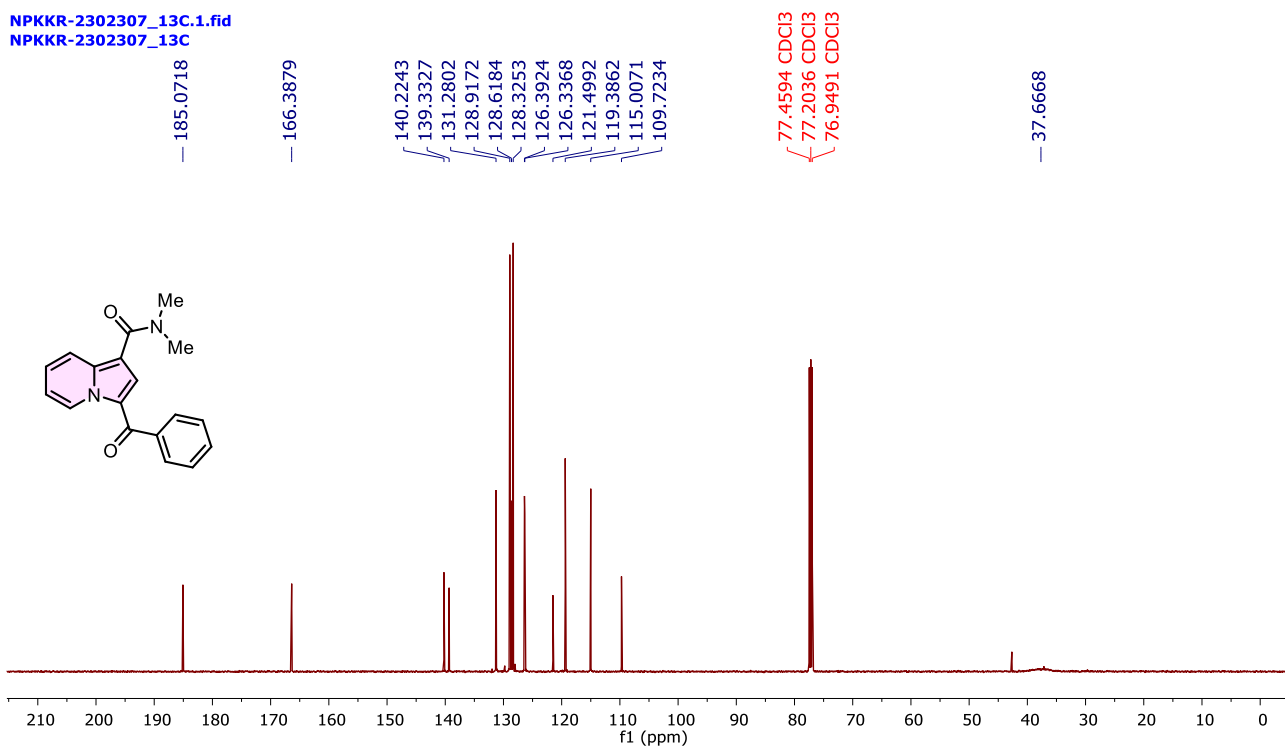

$^{13}\text{C}\{^1\text{H}\}$ -NMR (125 MHz,  $\text{CDCl}_3$ ) of 3-Benzoyl-N,N-dimethylindolizine-1-carboxamide (**1i**).

1H\_NPKKR-A2.1.fid  
1H\_NPKKR-A2

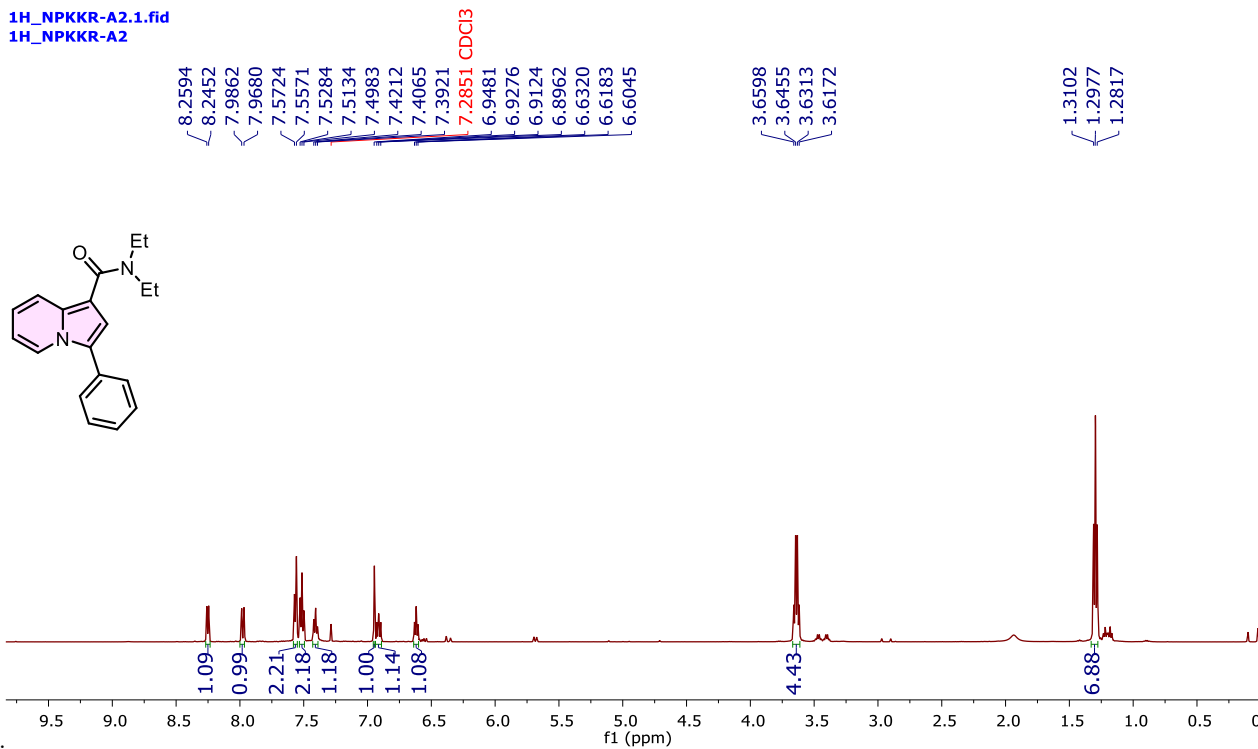

<sup>1</sup>H-NMR (500 MHz, CDCl<sub>3</sub>) of N,N-Diethyl-3-phenylindolizine-1-carboxamide (**1j**).

13C\_NPKKR-A2.1.fid  
13C\_NPKKR-A2

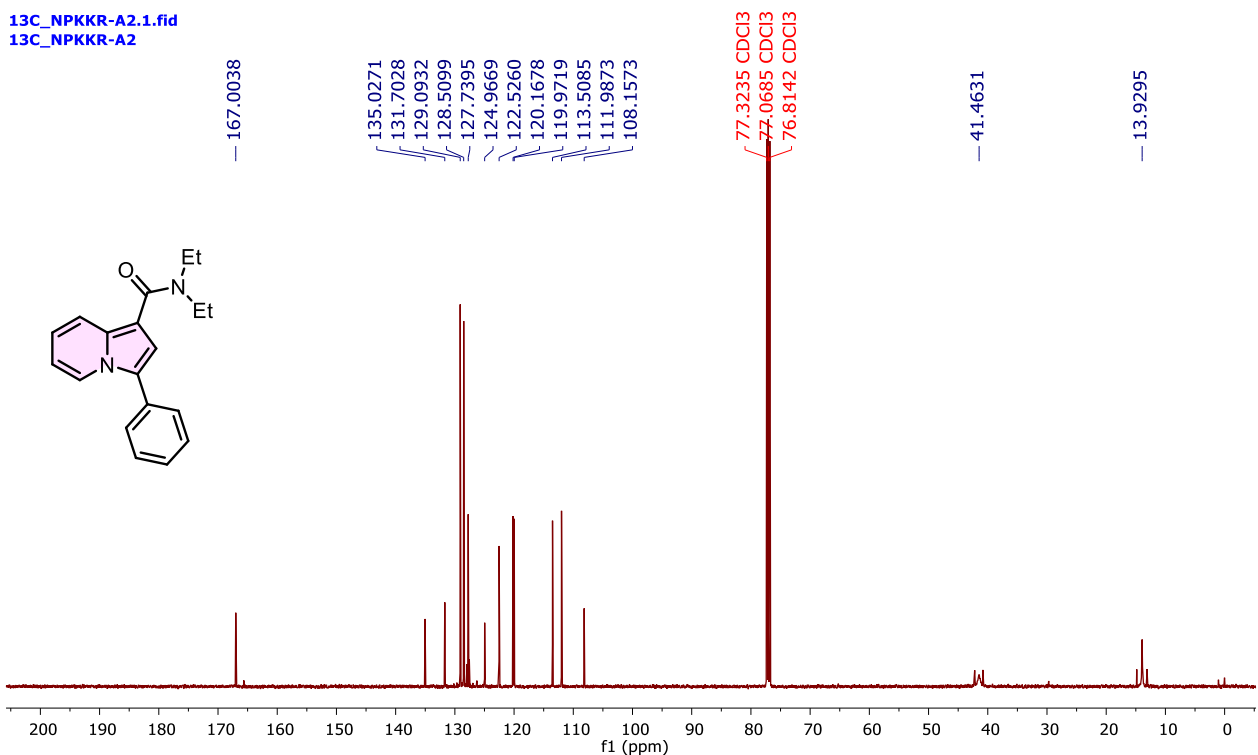

<sup>13</sup>C{<sup>1</sup>H}-NMR (125 MHz, CDCl<sub>3</sub>) of N,N-Diethyl-3-phenylindolizine-1-carboxamide (**1j**).

1H\_NPKKR-A5.1.fid  
1H\_NPKKR-A5

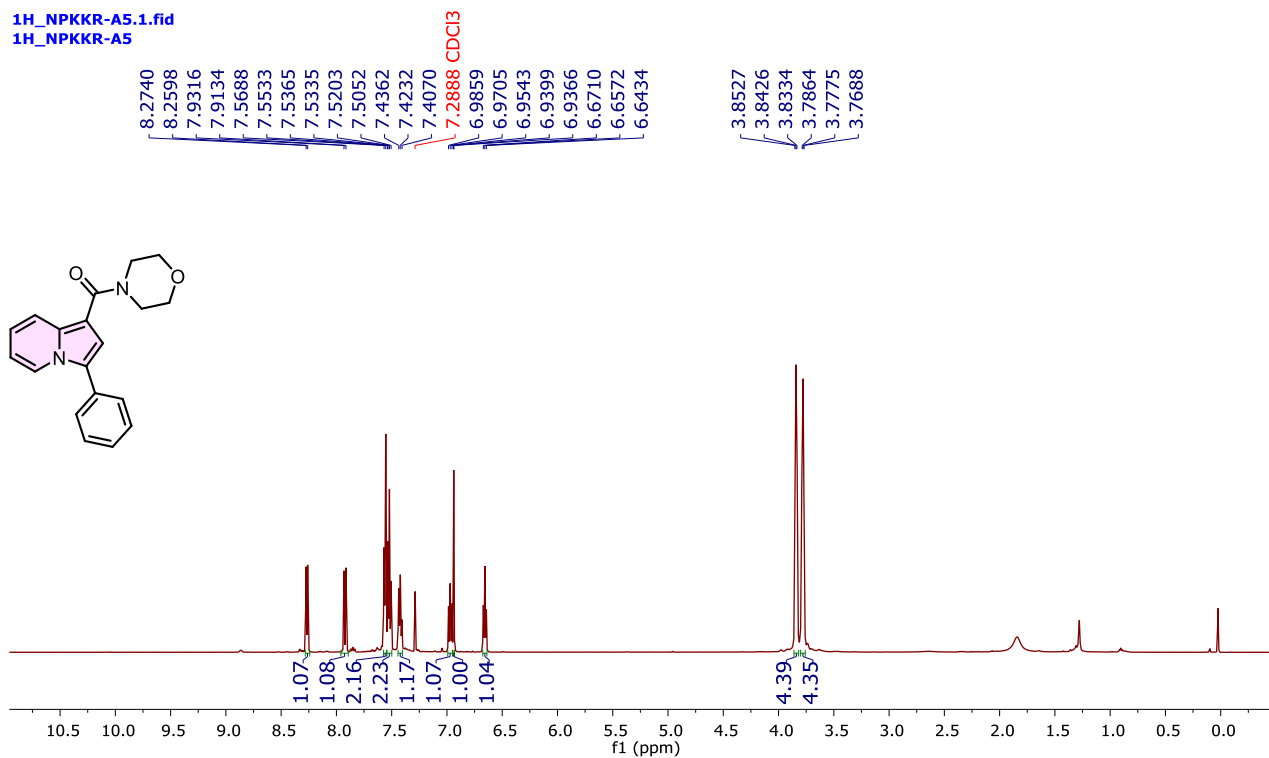

<sup>1</sup>H-NMR (500 MHz, CDCl<sub>3</sub>) of Morpholino(3-phenylindolizin-1-yl)methanone. (1k)

13C\_NPKKR-A5.1.fid  
13C\_NPKKR-A5

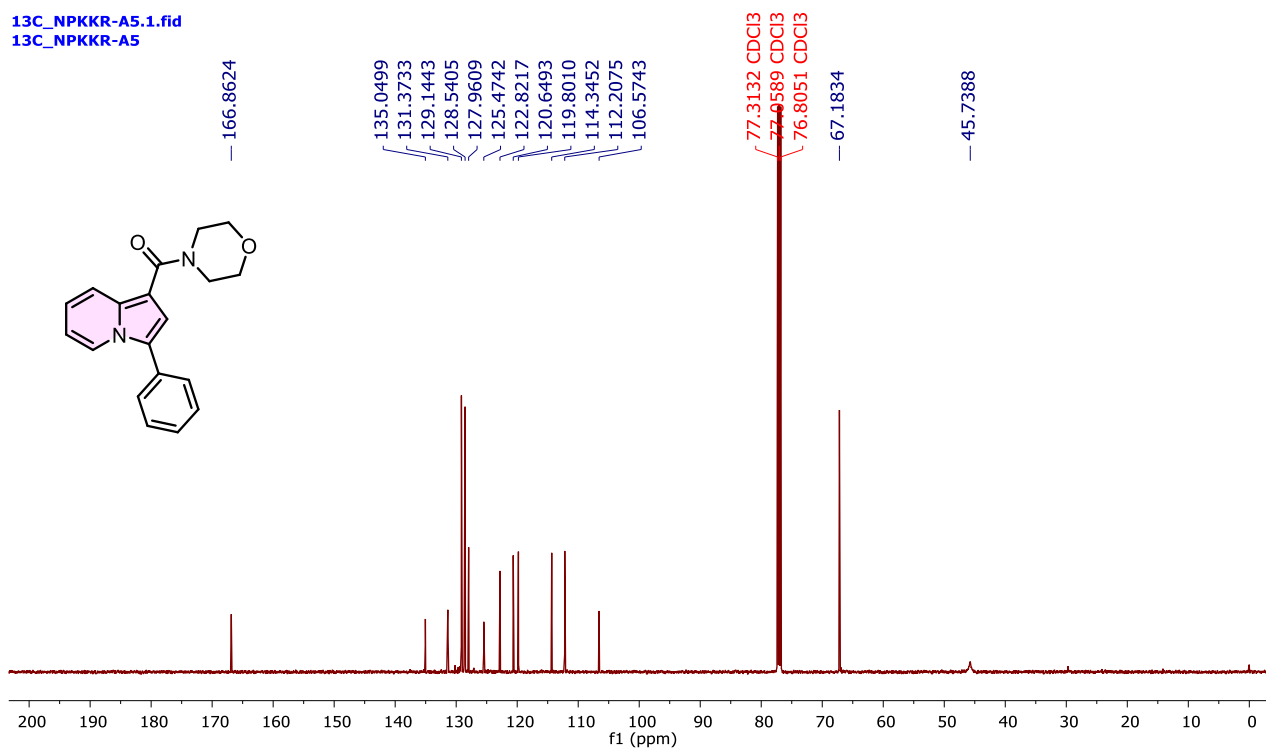

<sup>13</sup>C{<sup>1</sup>H}-NMR (125 MHz, CDCl<sub>3</sub>) of Morpholino(3-phenylindolizin-1-yl)methanone. (1k)

1H\_NPKKR-A1.1.fid  
1H\_NPKKR-A1

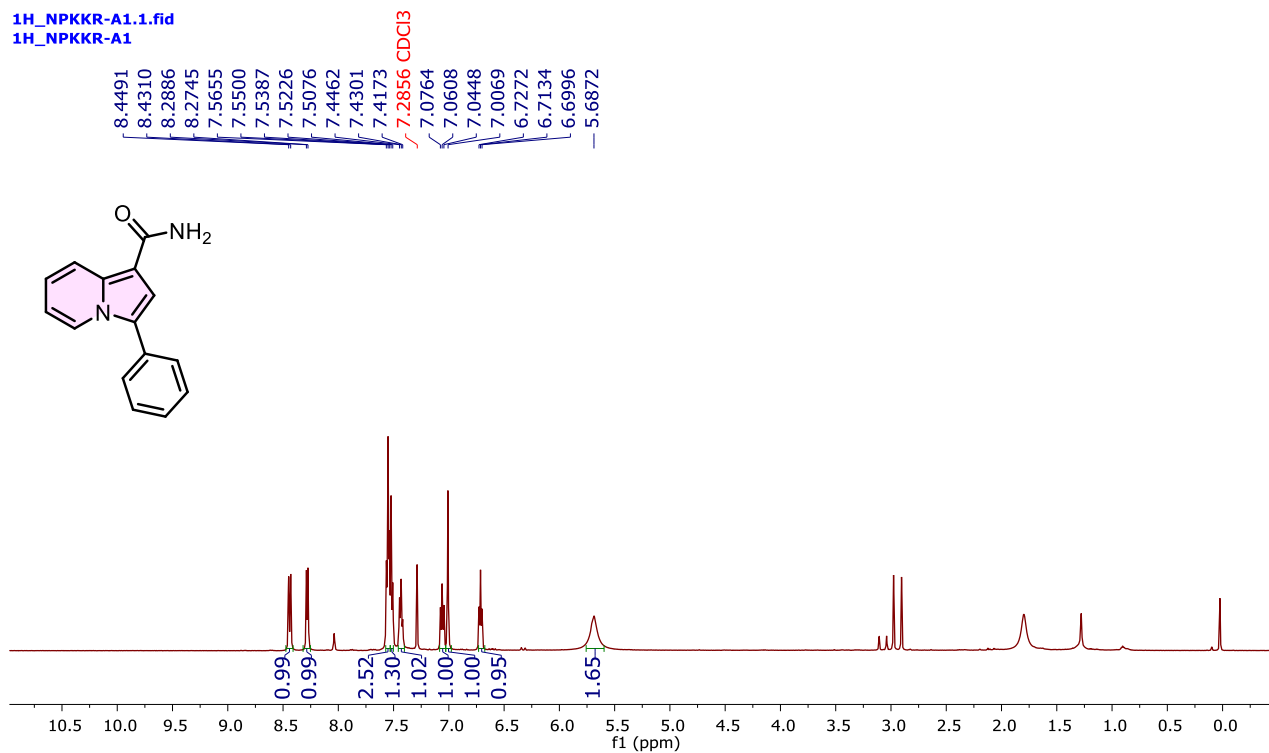

<sup>1</sup>H-NMR (500 MHz, CDCl<sub>3</sub>) of 3-Phenylindolizine-1-carboxamide. (II)

13C\_NPKKR-A1.1.fid  
13C\_NPKKR-A1

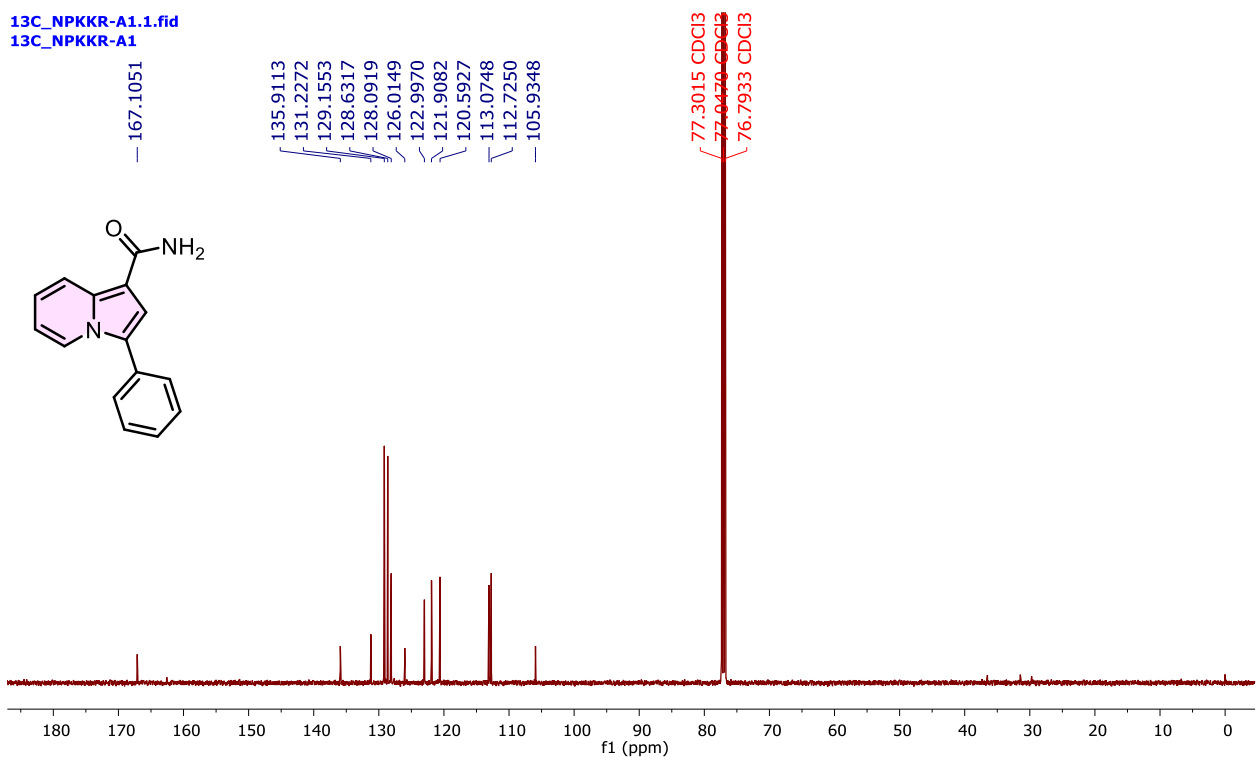

<sup>13</sup>C{<sup>1</sup>H}-NMR (500 MHz, CDCl<sub>3</sub>) of 3-Phenylindolizine-1-carboxamide. (II)

NPKKR-NHP11\_1H.1.fid  
NPKKR-NHP11\_1H

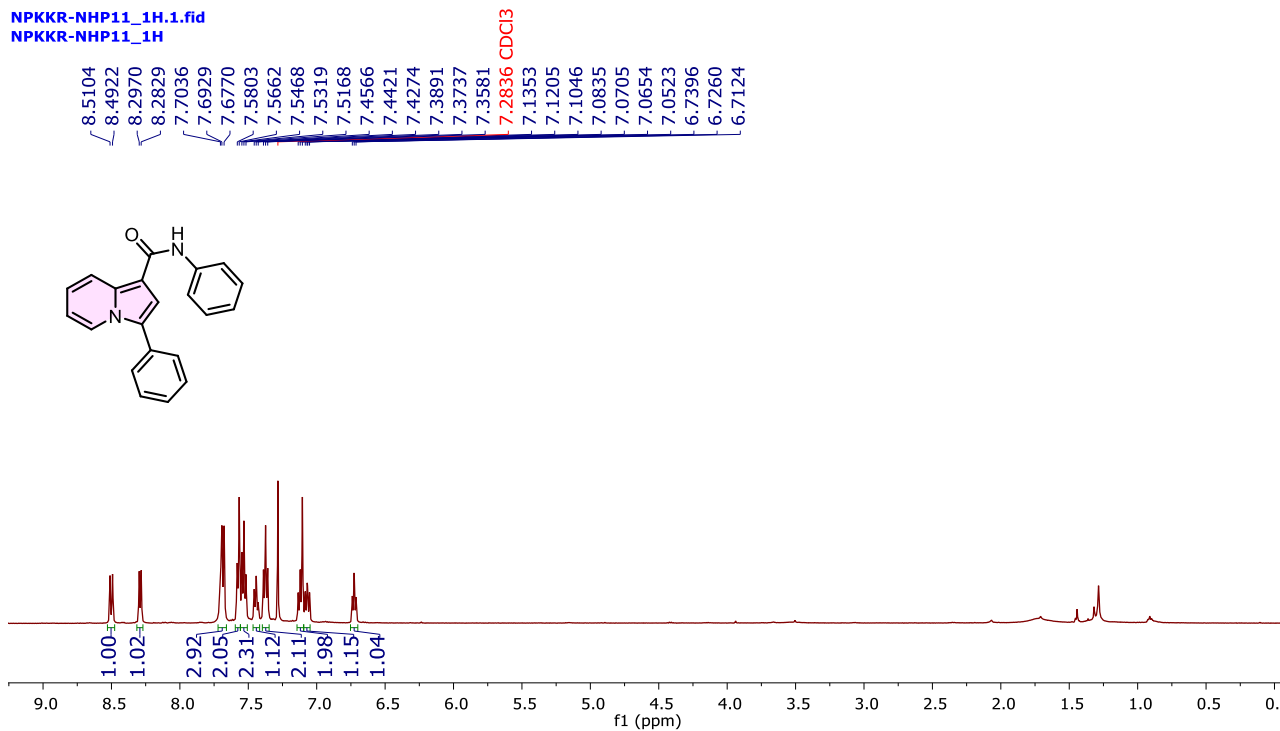

<sup>1</sup>H-NMR (500 MHz, CDCl<sub>3</sub>) of N,3-diphenylindolizine-1-carboxamide (**1m**).

NPKKR\_02033A6\_1H.1.fid  
NPKKR\_02033A6\_1H

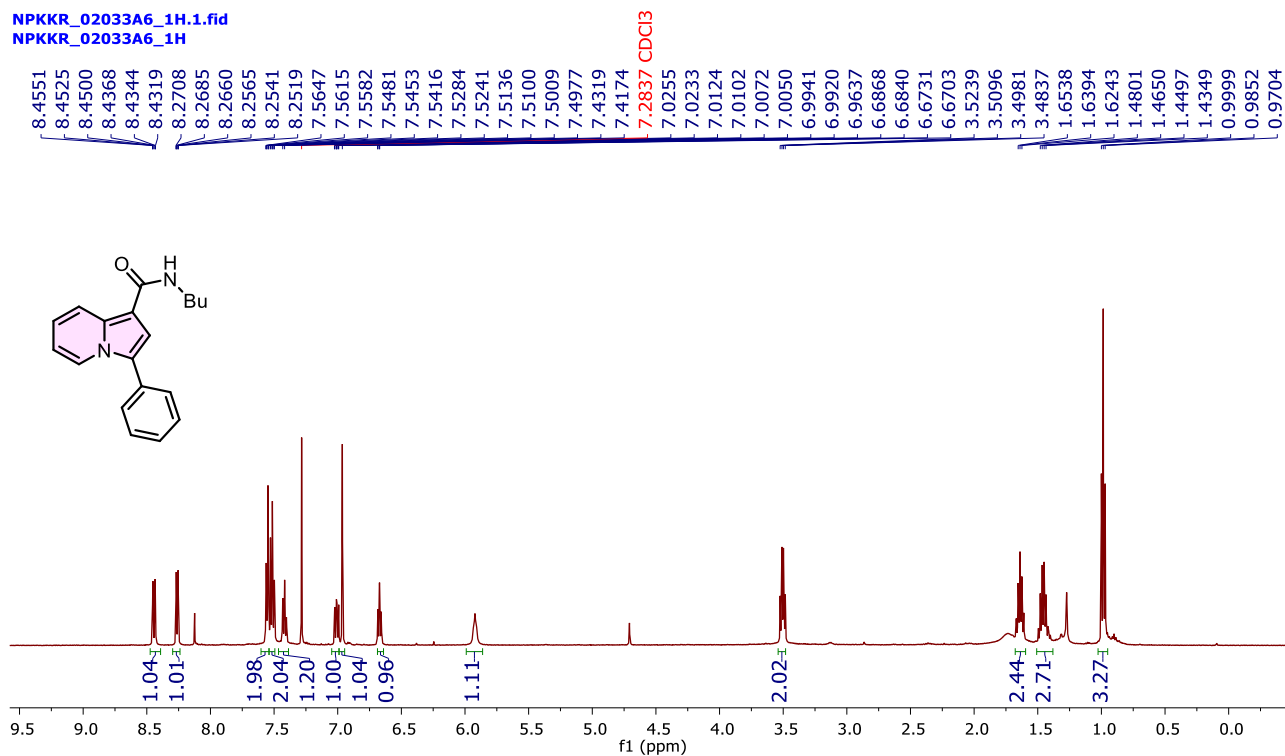

<sup>1</sup>H-NMR (500 MHz, CDCl<sub>3</sub>) of N-butyl-3-phenylindolizine-1-carboxamide (**1n**)

NPKKR-1310S4\_1H.1.fid  
NPKKR-1310S4\_1H

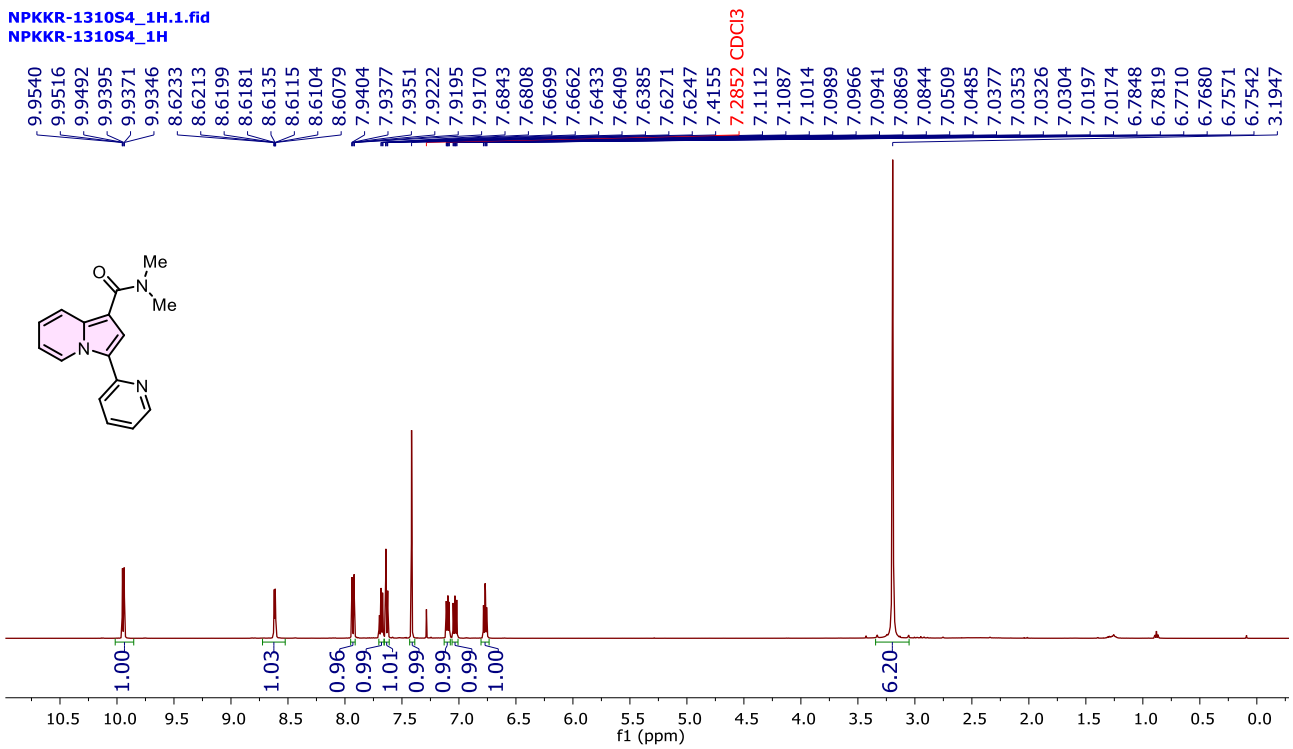

$^1\text{H-NMR}$  (500 MHz,  $\text{CDCl}_3$ ) of N,N-dimethyl-3-(pyridin-2-yl)indolizine-1-carboxamide (**10**).

NPKKR-1310S4\_13C.1.fid  
NPKKR-1310S4\_13C

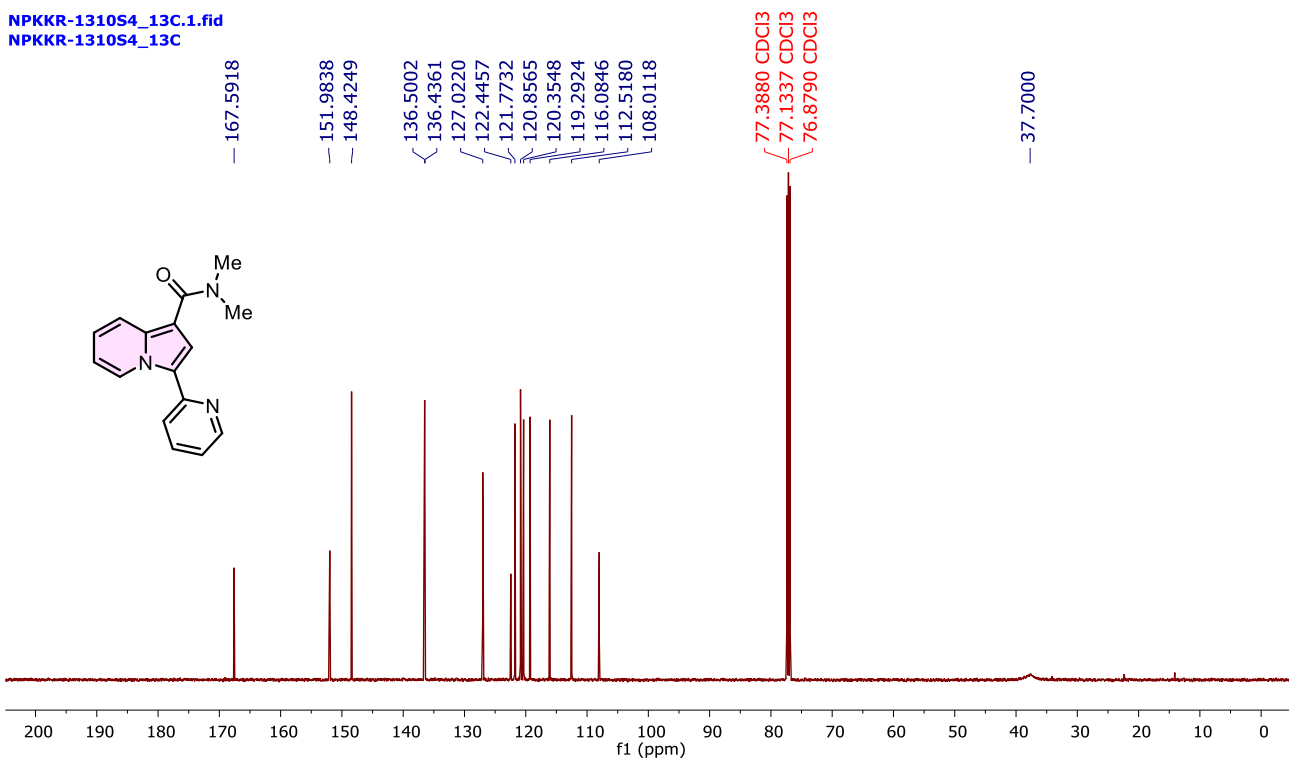

$^{13}\text{C}\{^1\text{H}\}$ -NMR (125 MHz,  $\text{CDCl}_3$ ) of N,N-dimethyl-3-(pyridin-2-yl)indolizine-1-carboxamide (**10**).

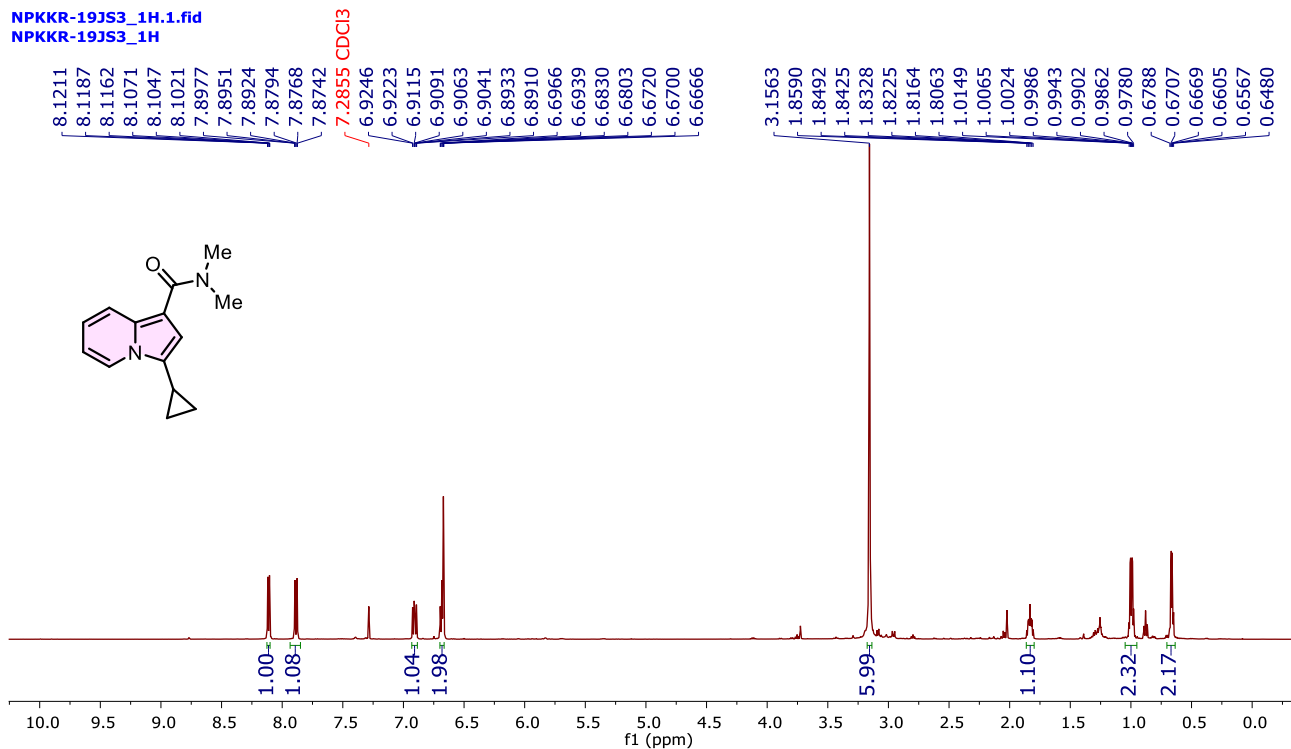

<sup>1</sup>H-NMR (500 MHz, CDCl<sub>3</sub>) of 3-Cyclopropyl-N,N-dimethylindolizine-1-carboxamide (**1p**).

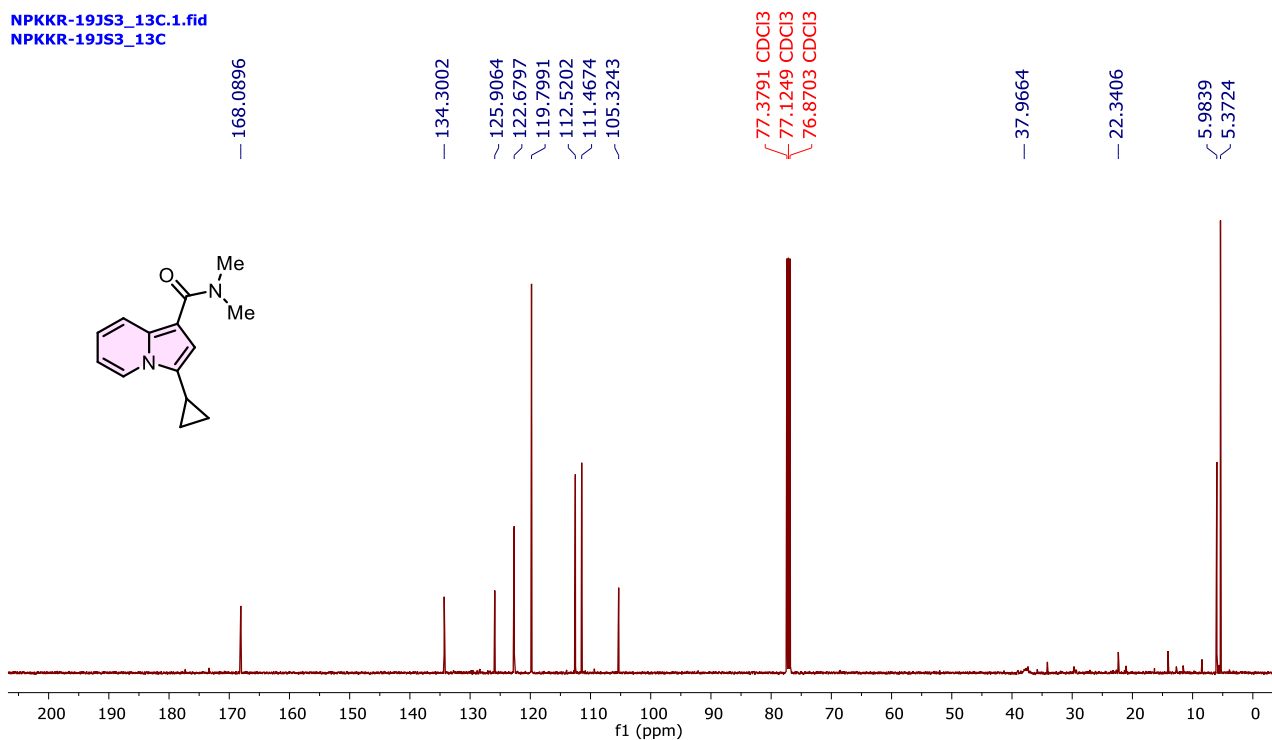

<sup>13</sup>C{<sup>1</sup>H}-NMR (125 MHz, CDCl<sub>3</sub>) of 3-Cyclopropyl-N,N-dimethylindolizine-1-carboxamide (**1p**).

NPKKR-A10\_1H.1.fid  
NPKKR-A10\_1H

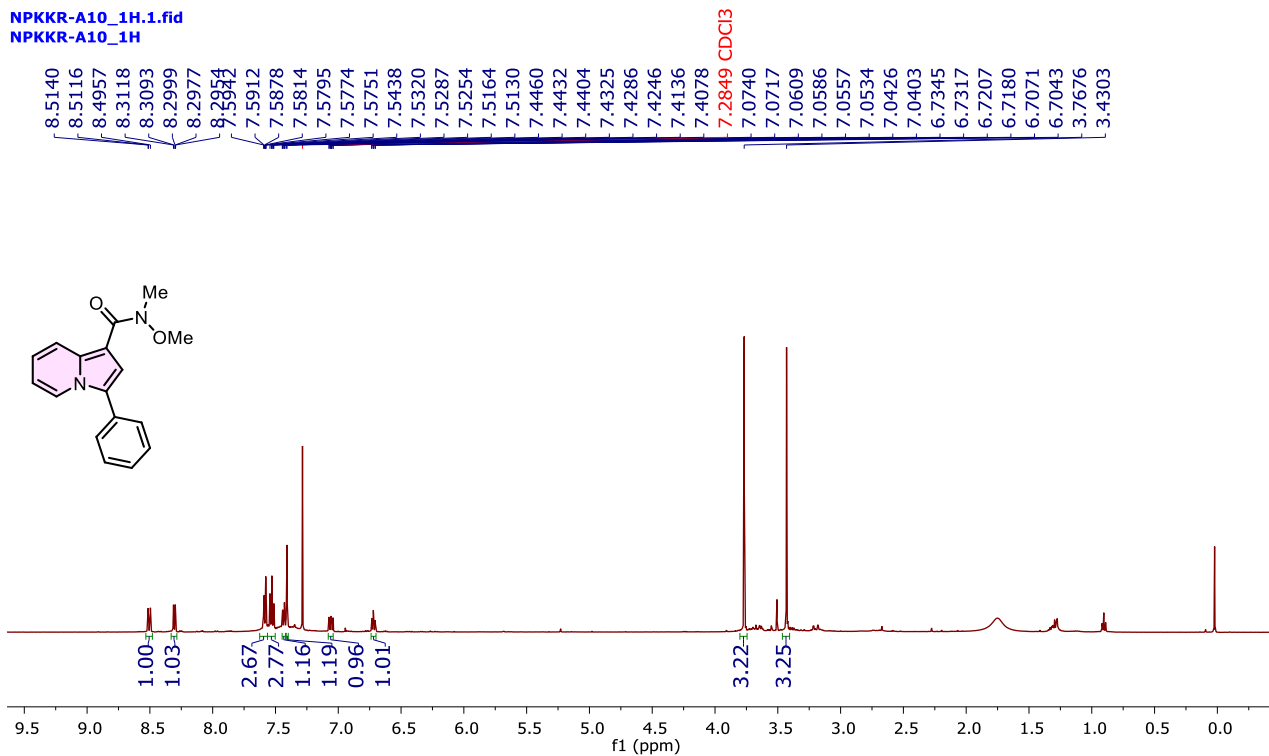

$^1\text{H-NMR}$  (500 MHz,  $\text{CDCl}_3$ ) of N-methoxy-N-methyl-3-phenylindolizine-1-carboxamide (**1q**).

NPKKR-A10\_13C.1.fid  
NPKKR-A10\_13C

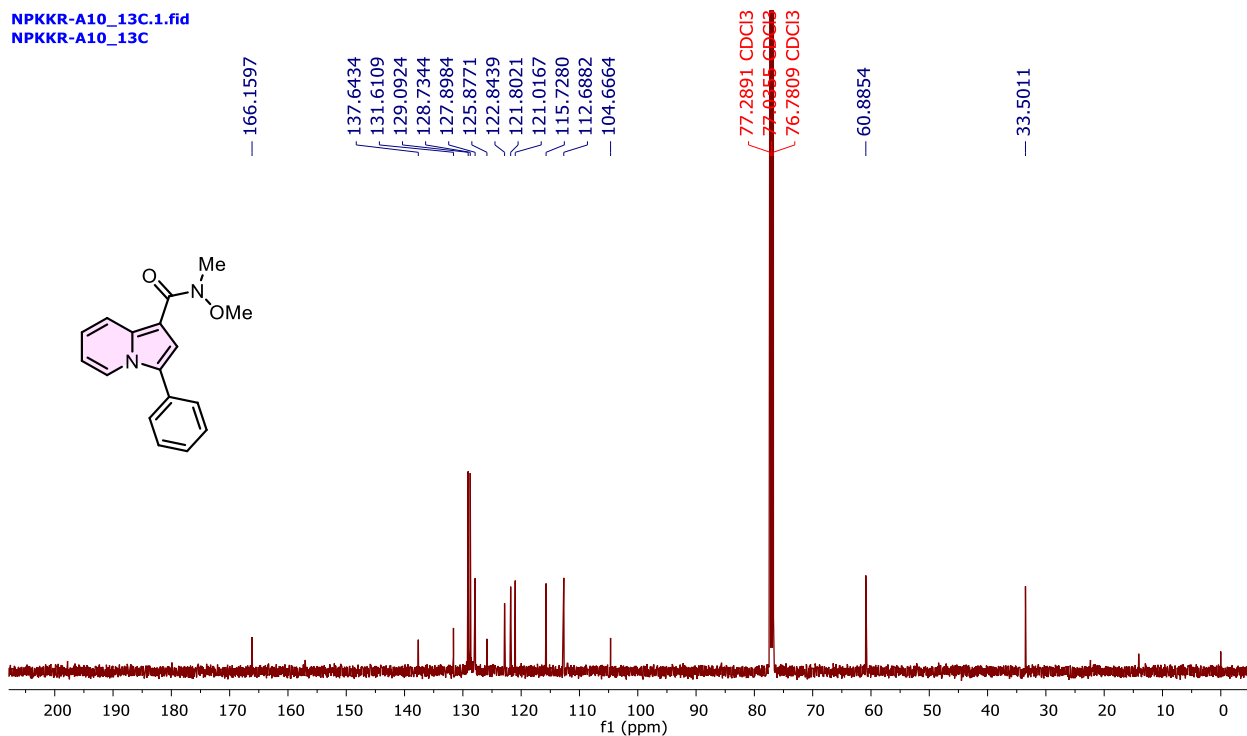

$^{13}\text{C}\{^1\text{H}\}$ -NMR (125 MHz,  $\text{CDCl}_3$ ) of N-methoxy-N-methyl-3-phenylindolizine-1-carboxamide (**1q**).

NPKKR-1310A6\_1H.1.fid  
NPKKR-1310A6\_1H

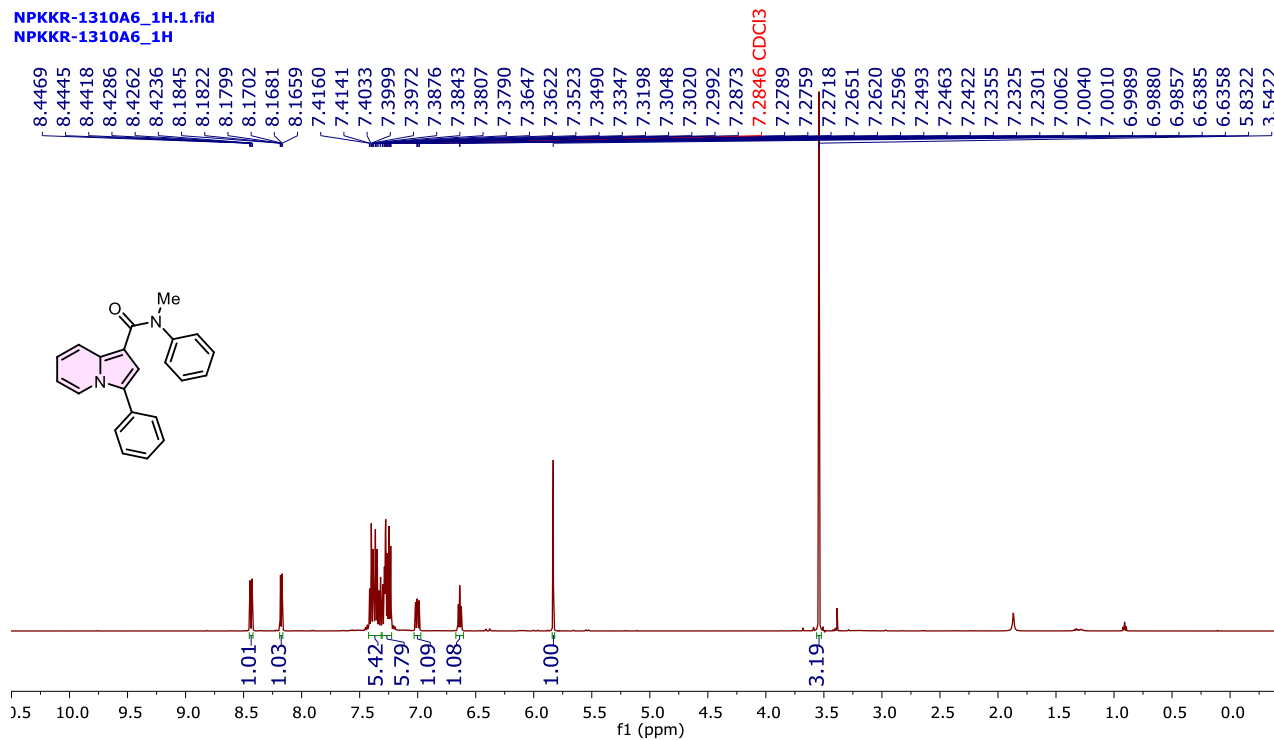

$^1\text{H-NMR}$  (500 MHz,  $\text{CDCl}_3$ ) of N-methyl-N,3-diphenylindolizine-1-carboxamide (**1r**).

NPKKR-1310A6\_13C.1.fid  
NPKKR-1310A6\_13C

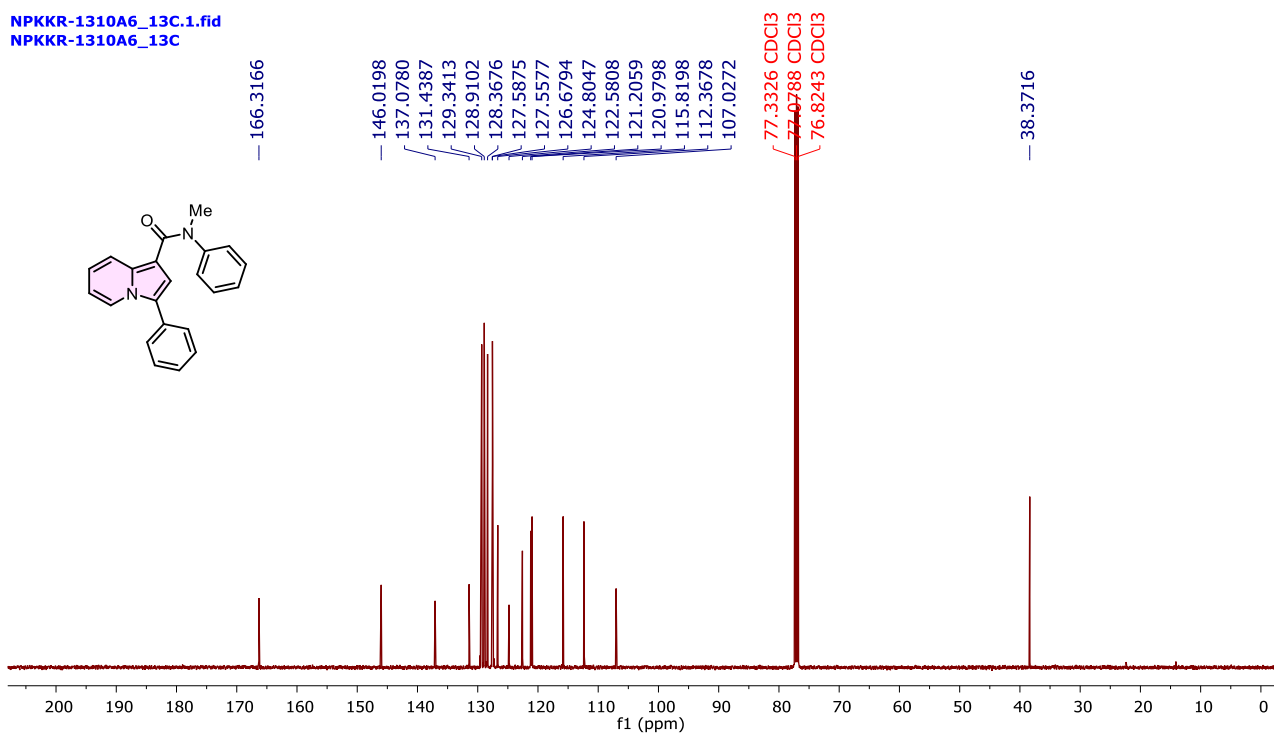

$^{13}\text{C}\{^1\text{H}\}$ -NMR (125 MHz,  $\text{CDCl}_3$ ) of N-methyl-N,3-diphenylindolizine-1-carboxamide (**1r**).

NPKKR-0203399\_1H.1.fid  
NPKKR-0203399\_1H

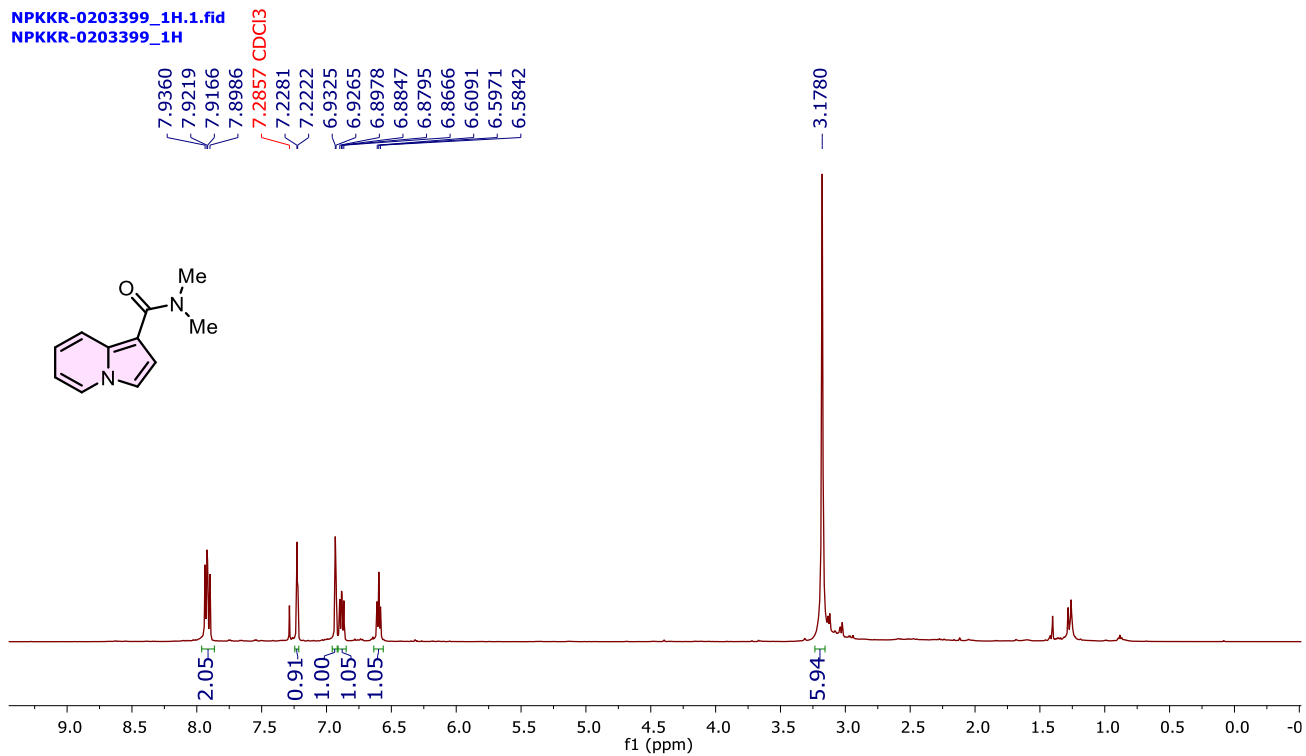

<sup>1</sup>H-NMR (500 MHz, CDCl<sub>3</sub>) of N,N-dimethylindolizine-1-carboxamide (**1s**)

## 9. $^1\text{H}$ , $^{13}\text{C}\{^1\text{H}\}$ , and $^{19}\text{F}$ NMR Spectra of C-8 Acyloxylated indolizines:

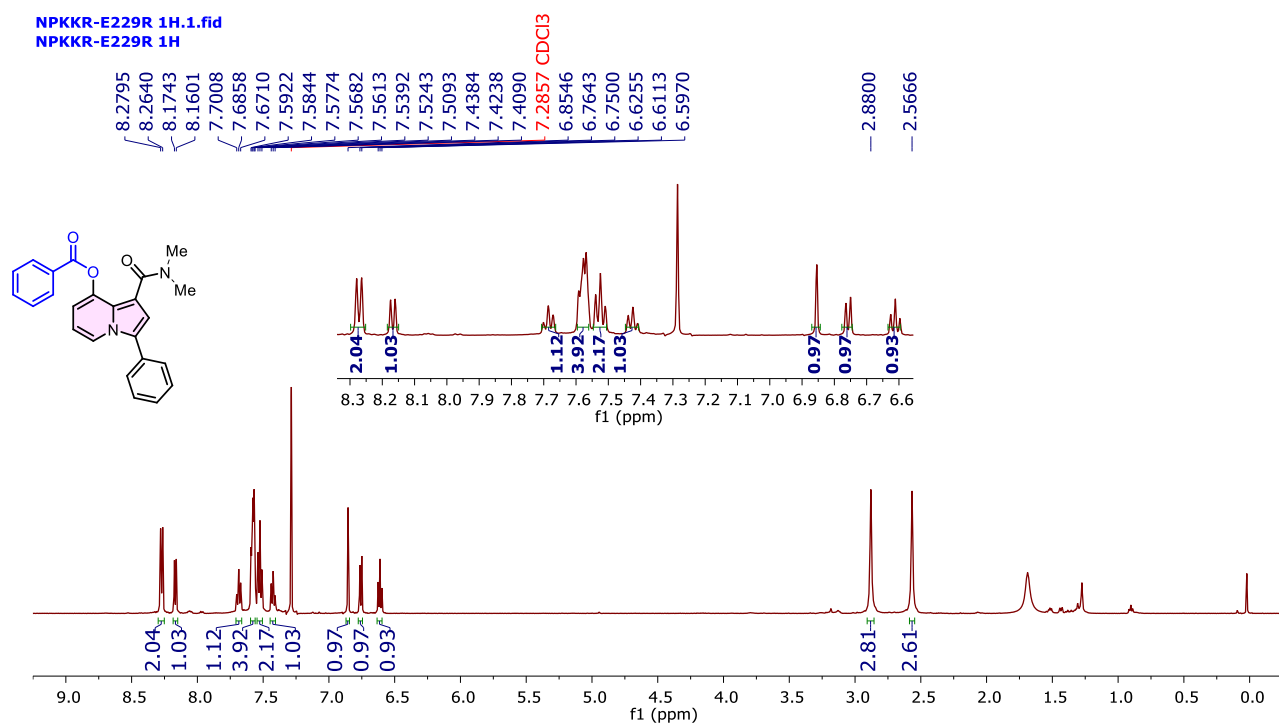

$^1\text{H}$  NMR (500 MHz,  $\text{CDCl}_3$ ) of 1-(Dimethylcarbamoyl)-3-phenylindolizin-8-yl benzoate. (3aa)

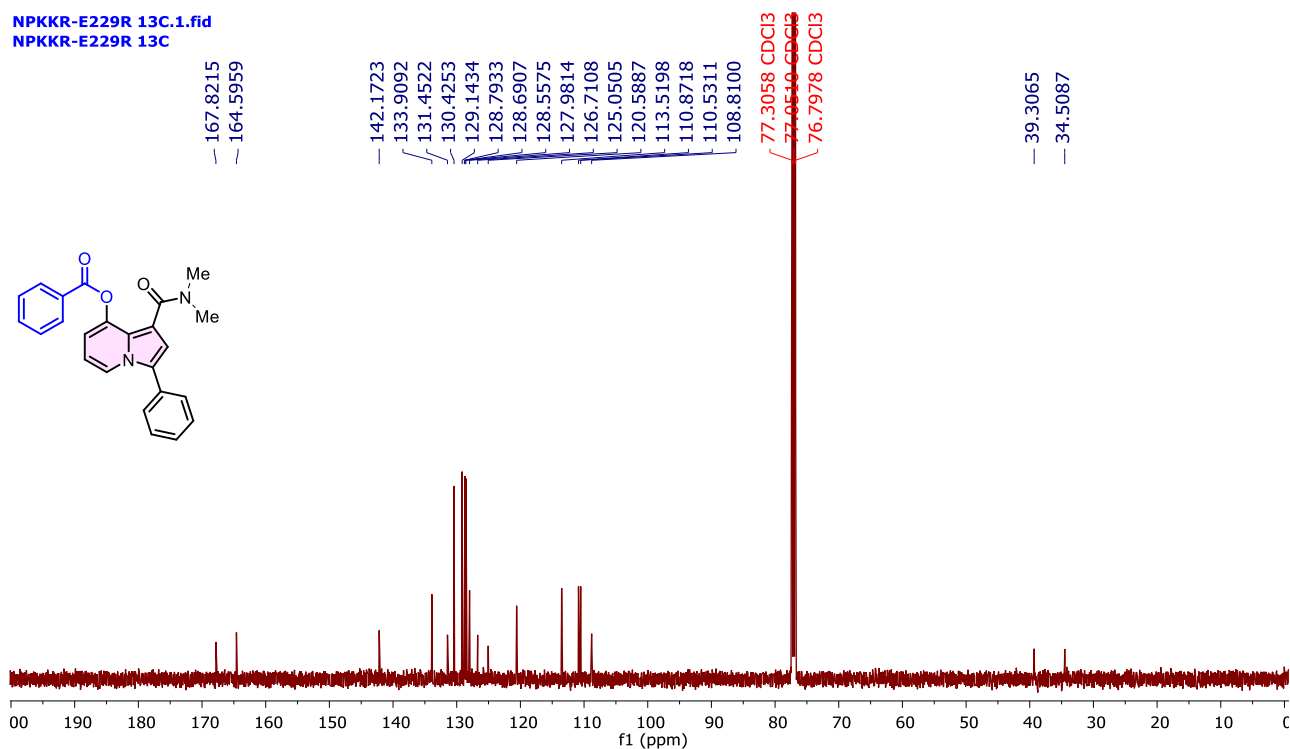

$^{13}\text{C}\{^1\text{H}\}$ -NMR (125 MHz,  $\text{CDCl}_3$ ) of 1-(Dimethylcarbamoyl)-3-phenylindolizin-8-yl benzoate. (3aa)

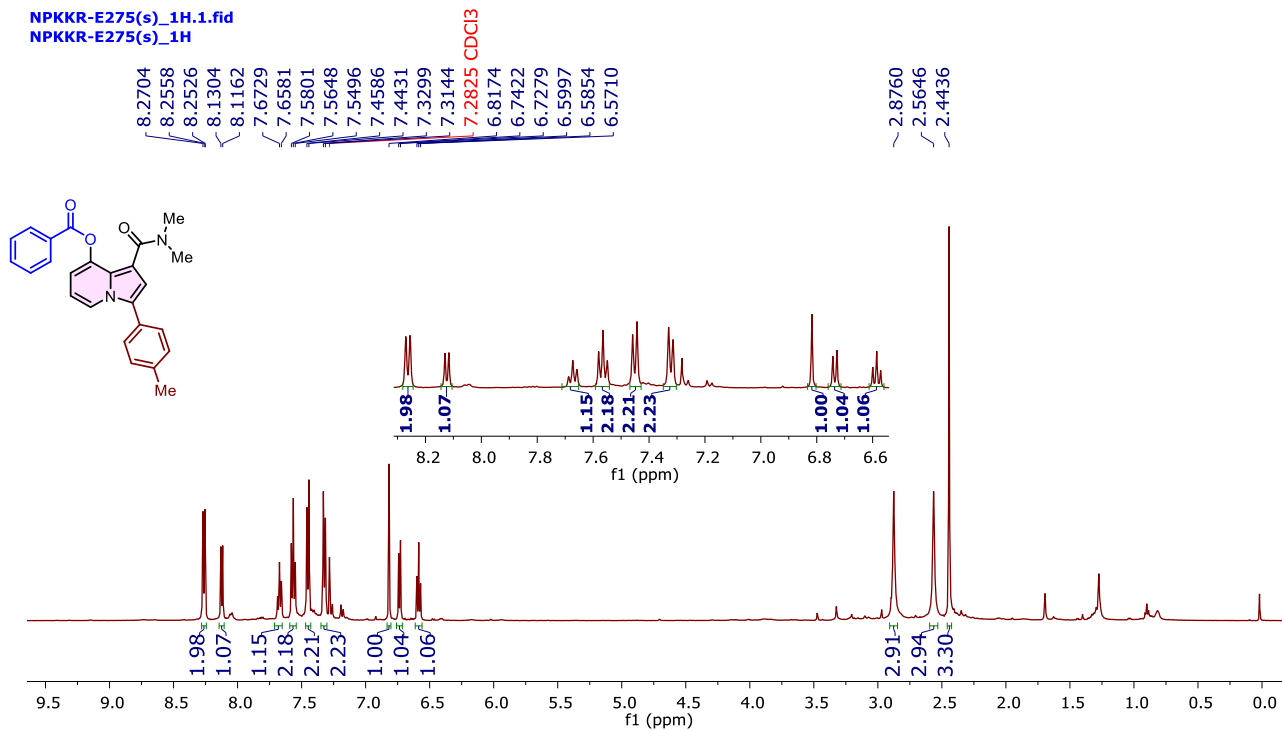

<sup>1</sup>H NMR (500 MHz, CDCl<sub>3</sub>) of 1-(dimethylcarbamoyl)-3-(p-tolyl) indolizin-8-yl benzoate (**3ba**)

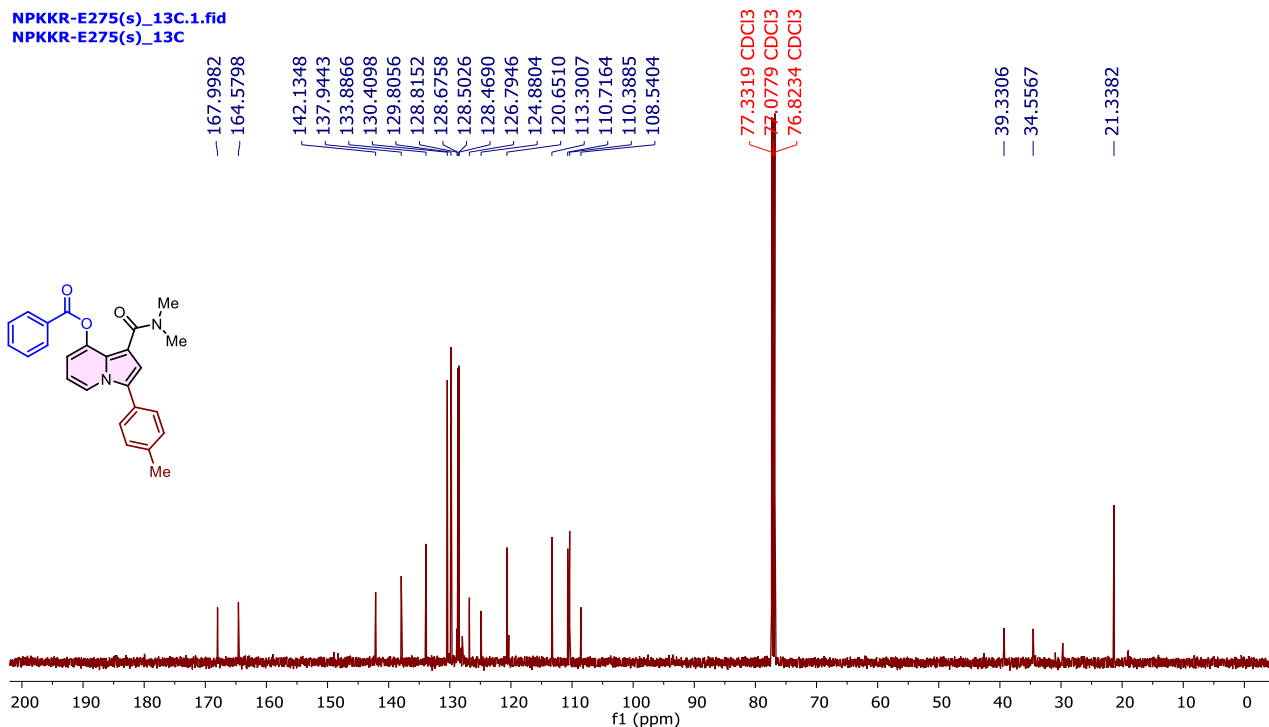

<sup>13</sup>C{<sup>1</sup>H} NMR (125 MHz, CDCl<sub>3</sub>) of 1-(dimethylcarbamoyl)-3-(p-tolyl) indolizin-8-yl benzoate (**3ba**)

NPKKR-E277 1H.1.fid  
NPKKR-E277 1H

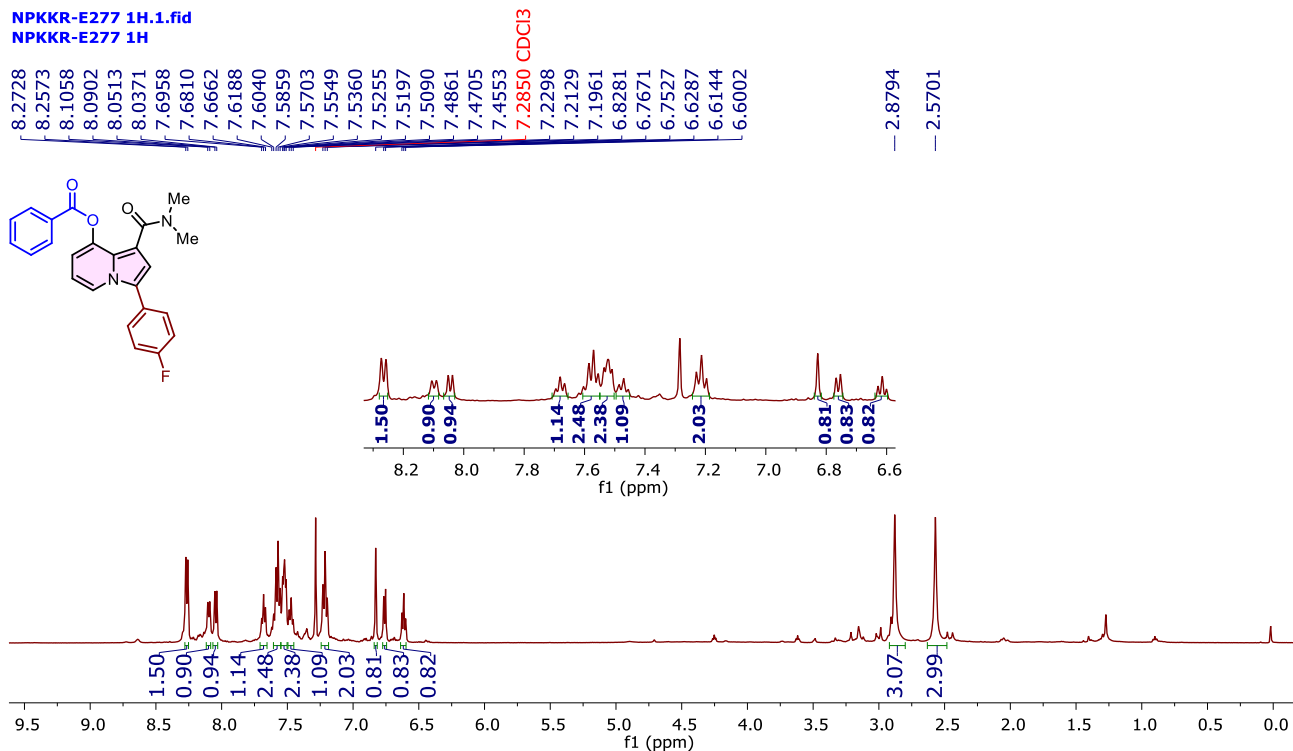

$^1\text{H}$  NMR (500 MHz,  $\text{CDCl}_3$ ) of 1-(Dimethylcarbamoyl)-3-(4-fluorophenyl) indolizin-8-yl benzoate (**3ca**).

NPKKR-E277 13C R.1.fid  
NPKKR-E277 13C R

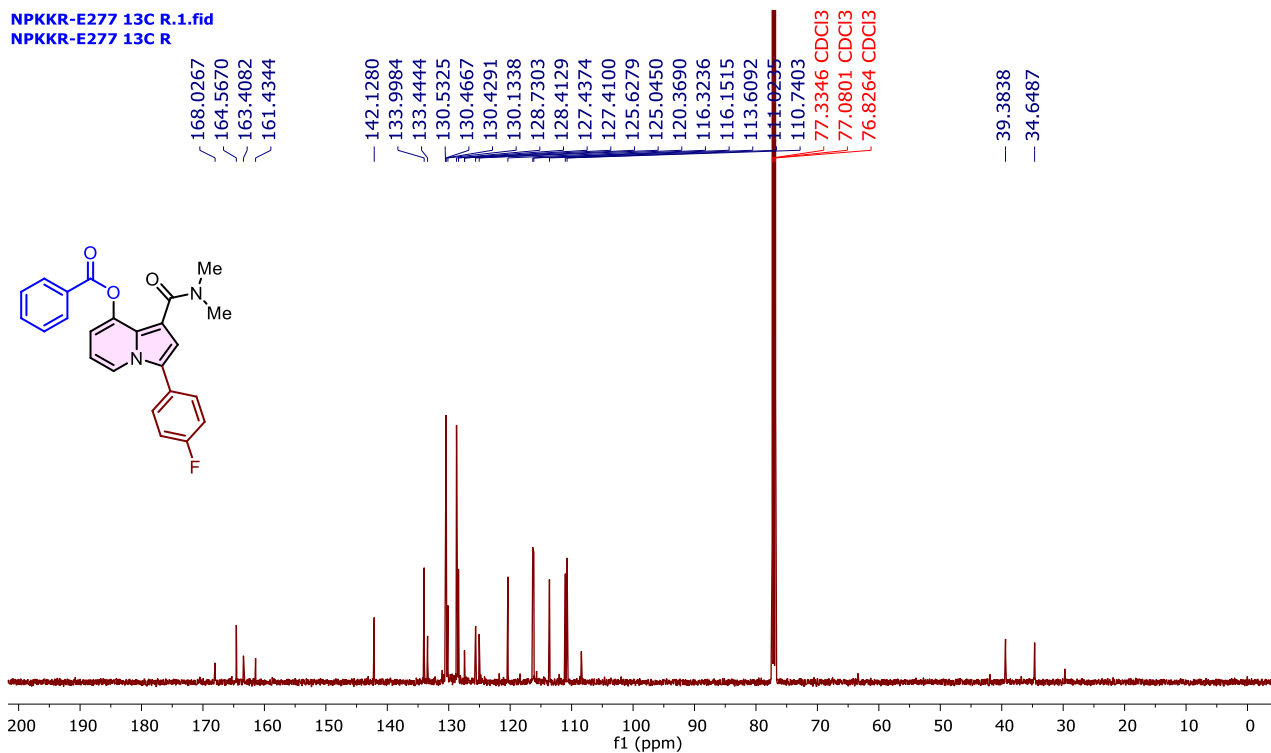

$^{13}\text{C}\{^1\text{H}\}$  NMR (125 MHz,  $\text{CDCl}_3$ ) of 1-(Dimethylcarbamoyl)-3-(4-fluorophenyl) indolizin-8-yl benzoate (**3ca**).

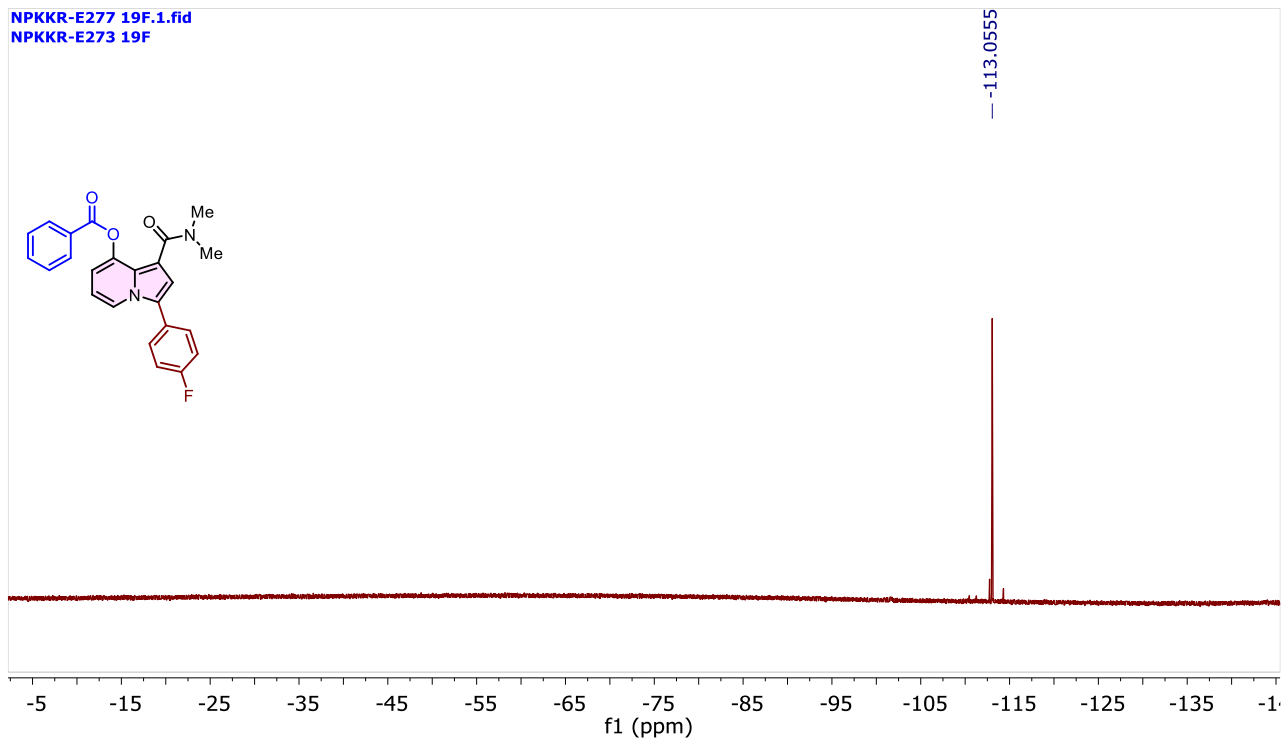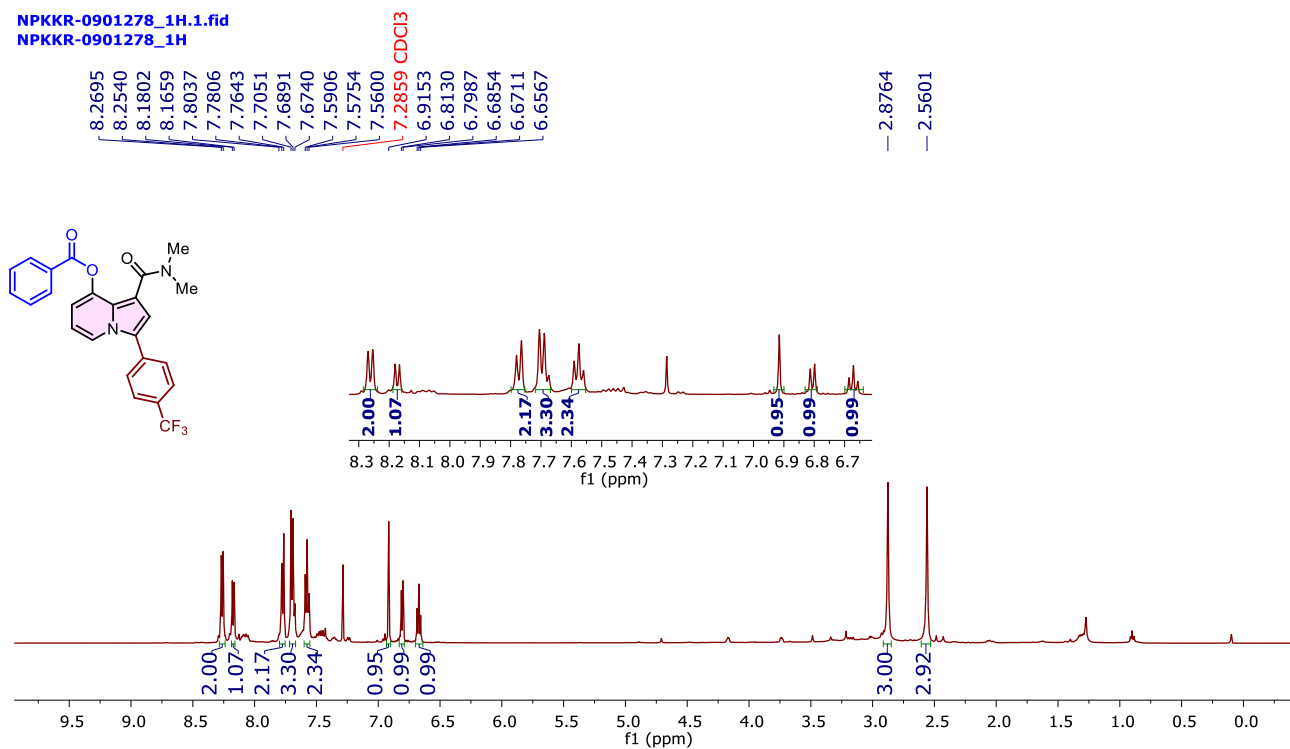

NPKKR-0901278\_13C.1.fid  
NPKKR-0901278\_13H

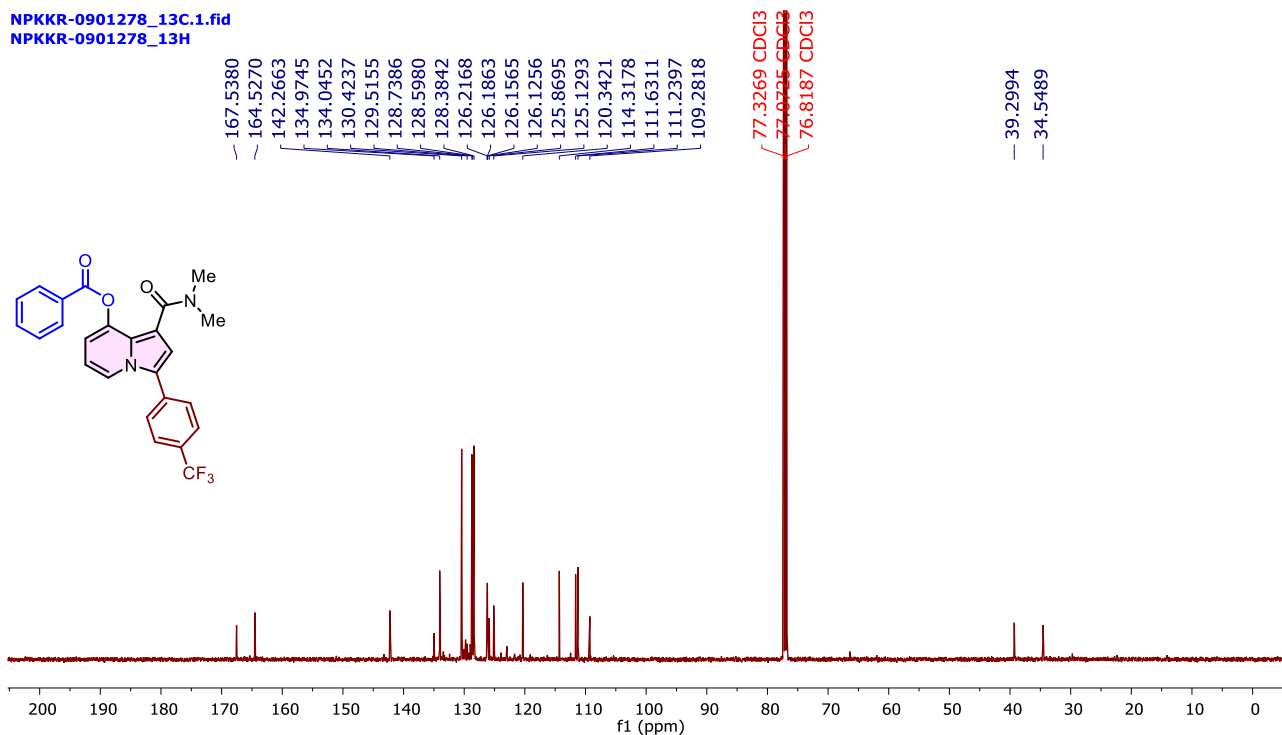

<sup>13</sup>C{<sup>1</sup>H} NMR (125 MHz, CDCl<sub>3</sub>) of 1-(Dimethylcarbamoyl)-3-(4-(trifluoromethyl)phenyl) indolizin-8-yl benzoate (**3da**).

NPKKR-E278 19F.1.fid  
NPKKR-E278 19F

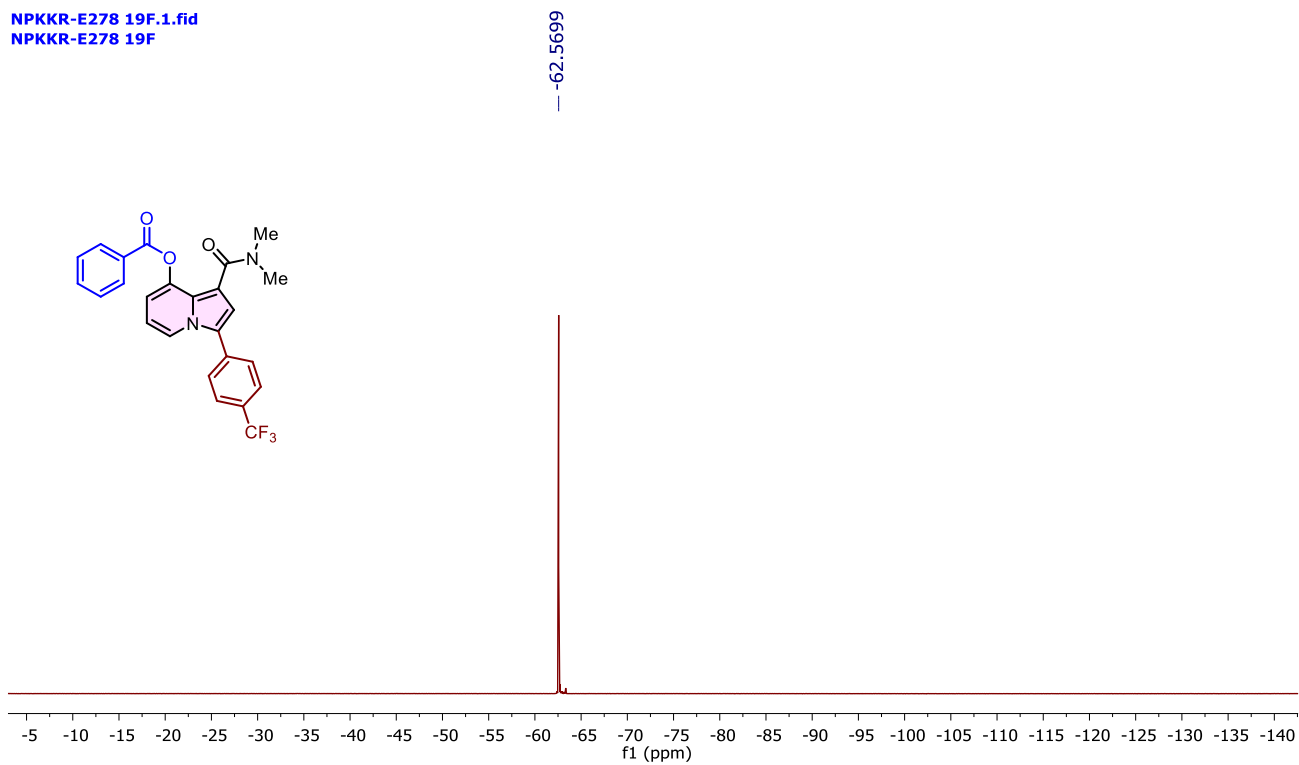

<sup>19</sup>F NMR (470 MHz, CDCl<sub>3</sub>) of 1-(Dimethylcarbamoyl)-3-(4-(trifluoromethyl)phenyl) indolizin-8-yl benzoate (**3da**).

NPKKR-E270 1H.1.fid  
NPKKR-E270 1H

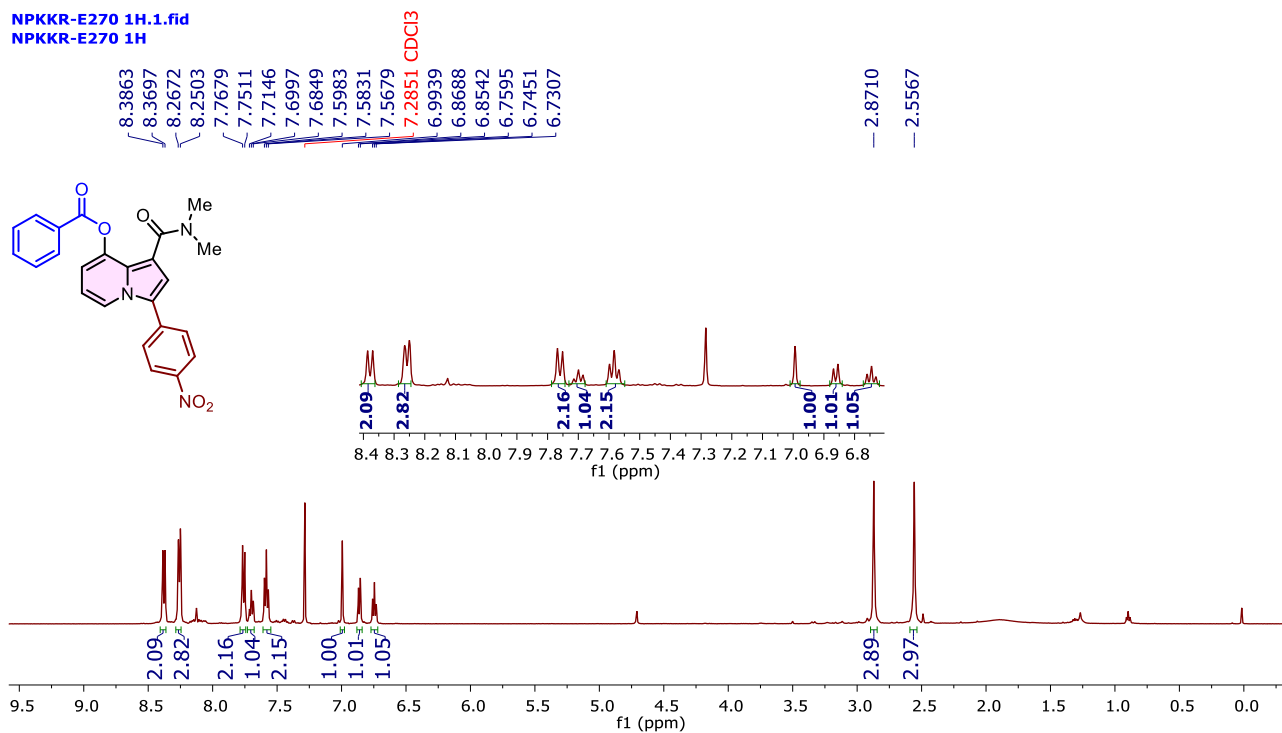

<sup>1</sup>H NMR (500 MHz, CDCl<sub>3</sub>) of 1-(Dimethylcarbamoyl)-3-(4-nitrophenyl)indolizin-8-yl benzoate. (3ea)

NPKKR-E270 13C.1.fid  
NPKKR-E270 13C

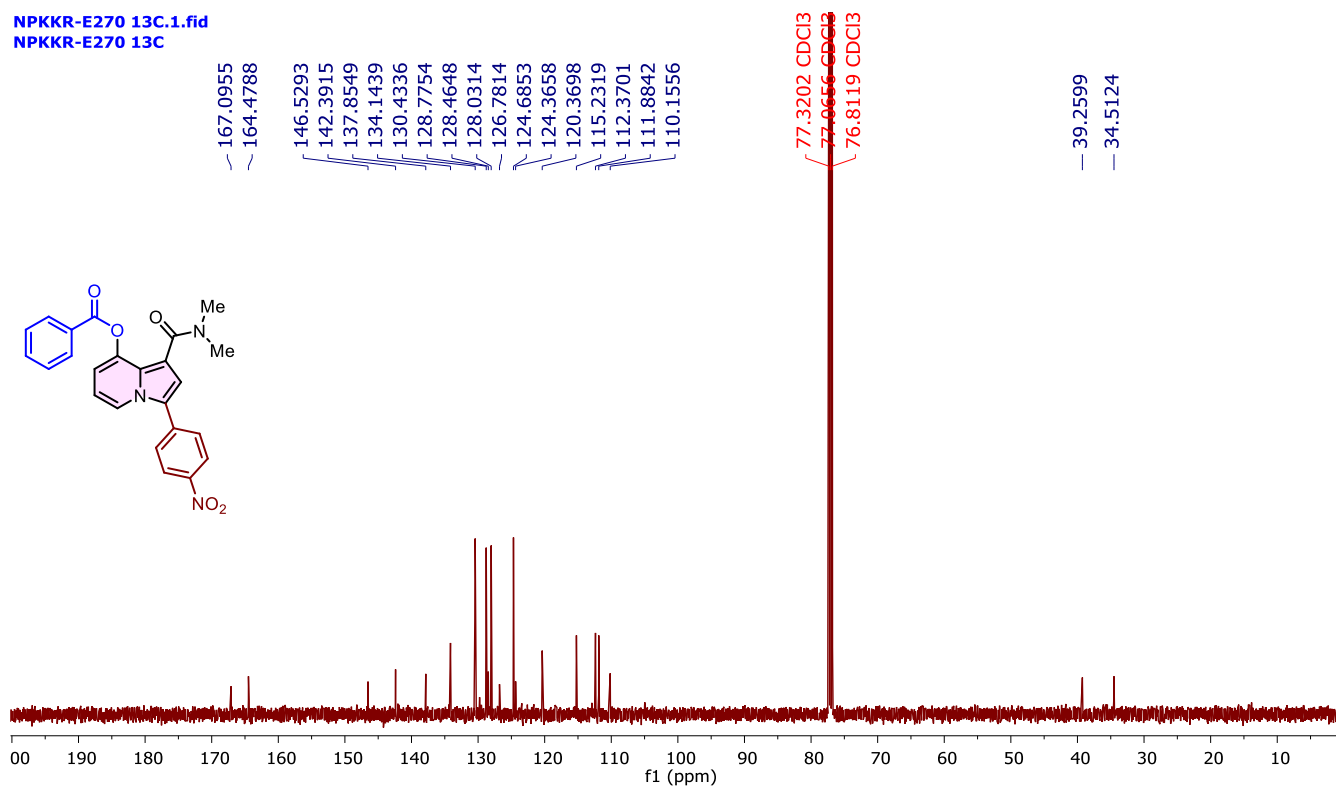

<sup>13</sup>C{<sup>1</sup>H} NMR (125 MHz, CDCl<sub>3</sub>) of 1-(Dimethylcarbamoyl)-3-(4-nitrophenyl)indolizin-8-yl benzoate. (3ea)

NPKKR\_02032792\_1H.1.fid  
NPKKR\_02032792\_1H

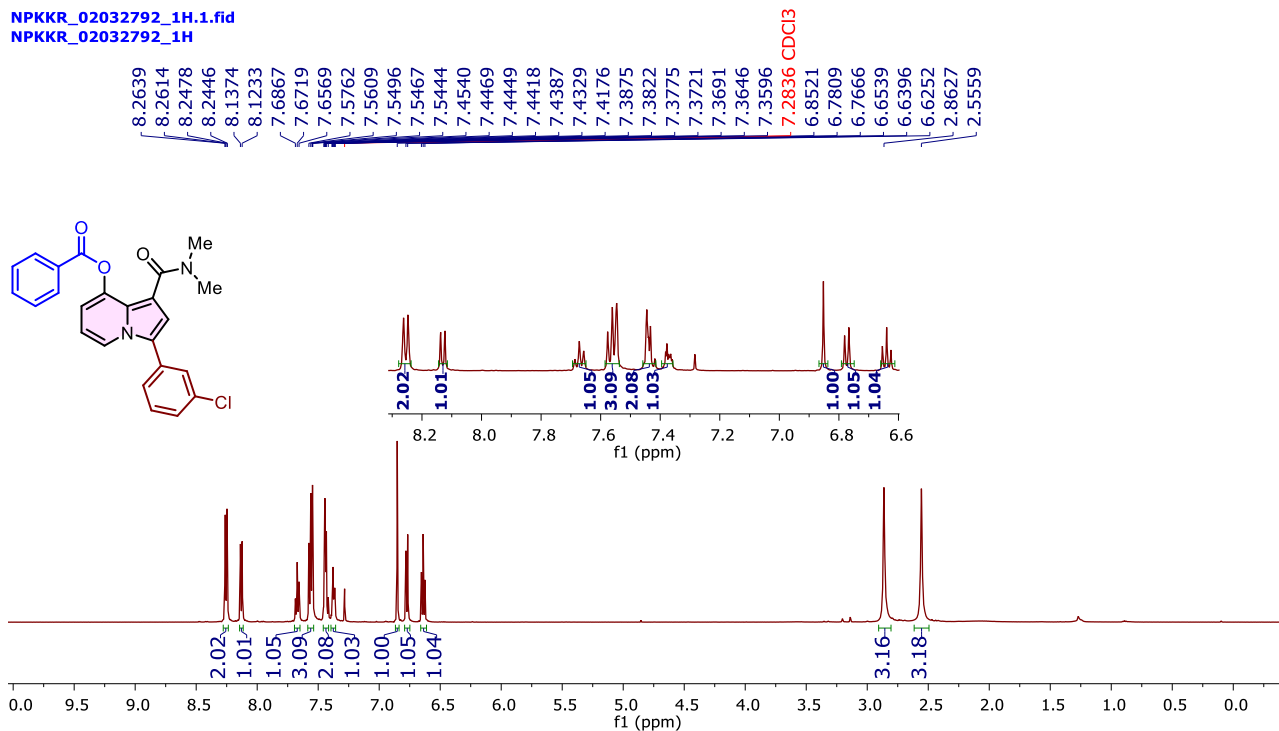

<sup>1</sup>H NMR (500 MHz, CDCl<sub>3</sub>) of 3-(3-Chlorophenyl)-1-(Dimethylcarbamoyl) indolizin-8-yl benzoate. (3fa).

NPKKR\_02032792\_13C.1.fid  
NPKKR\_02032792\_13C

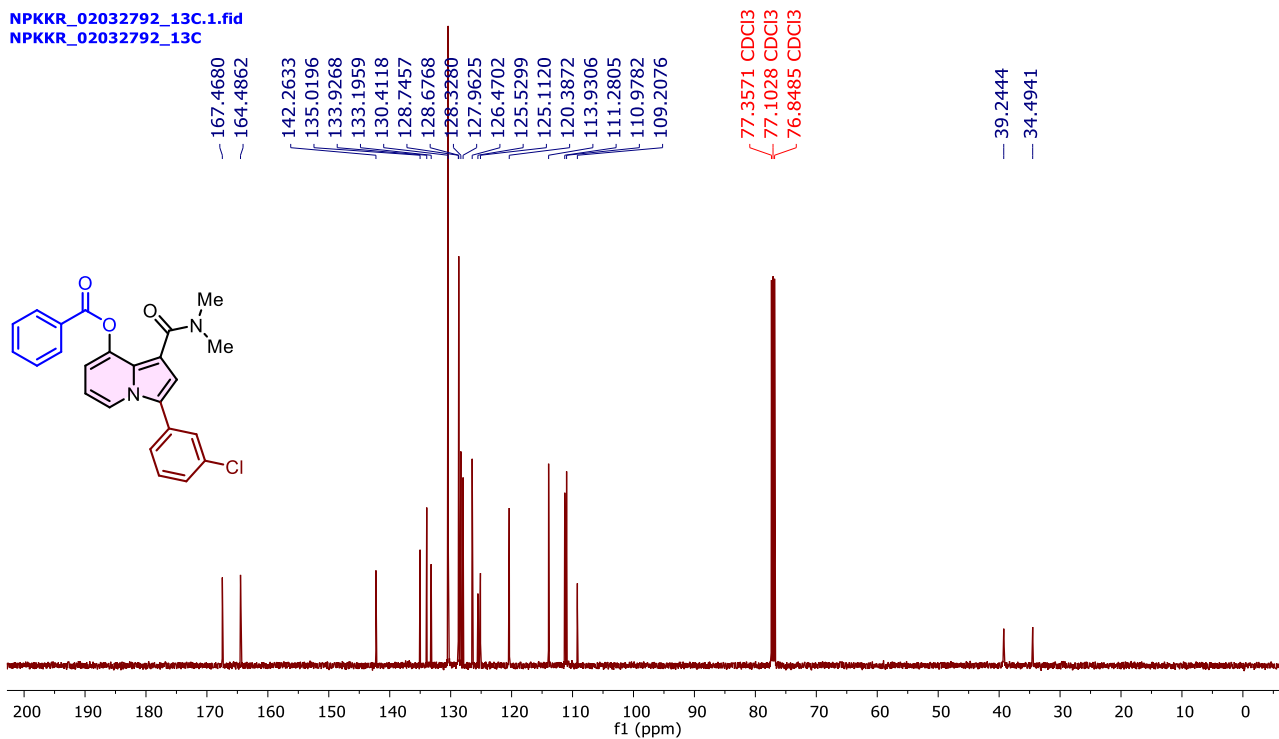

<sup>13</sup>C{<sup>1</sup>H} NMR (125 MHz, CDCl<sub>3</sub>) of 3-(3-Chlorophenyl)-1-(Dimethylcarbamoyl) indolizin-8-yl benzoate. (3fa).

NPKKR-0203271\_1H.1.fid  
NPKKR-0203271\_1H

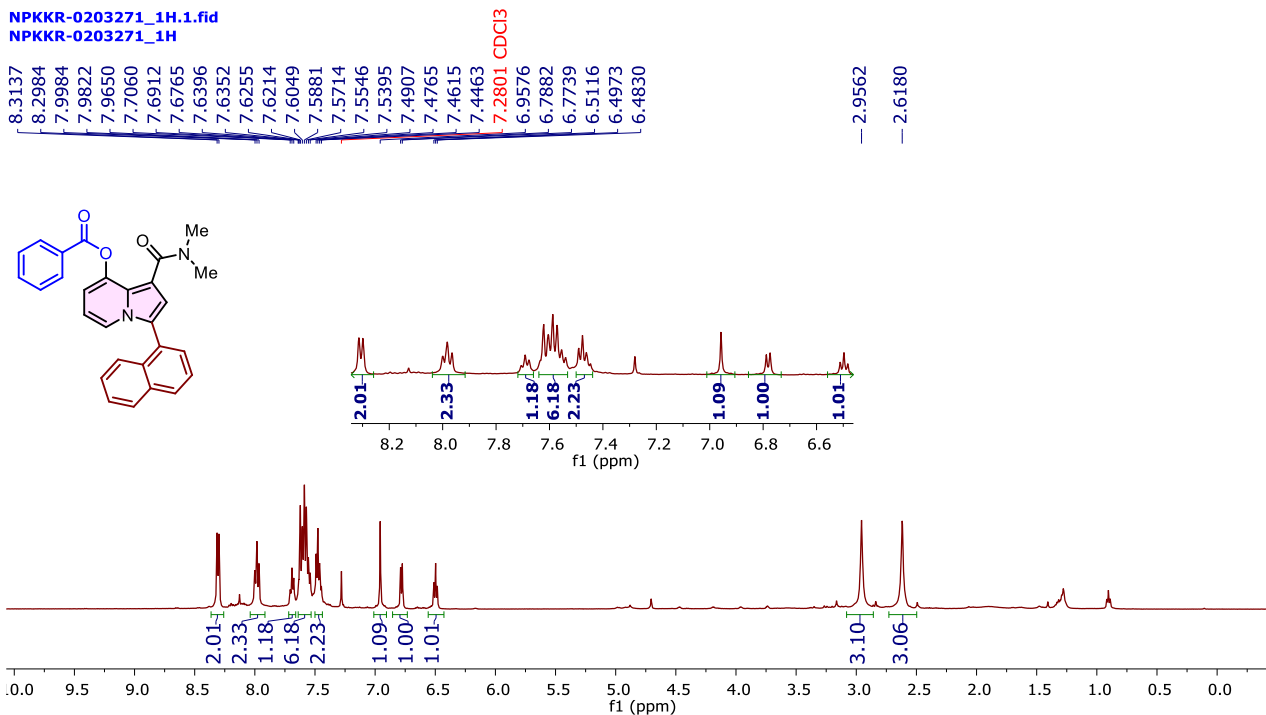

$^1\text{H NMR}$  (500 MHz,  $\text{CDCl}_3$ ) of 1-(Dimethylcarbamoyl)-3-(naphthalen-1-yl)indolizin-8-yl benzoate. (3ga)

NPKKR-0203271\_13C.1.fid  
NPKKR-0203271\_13C

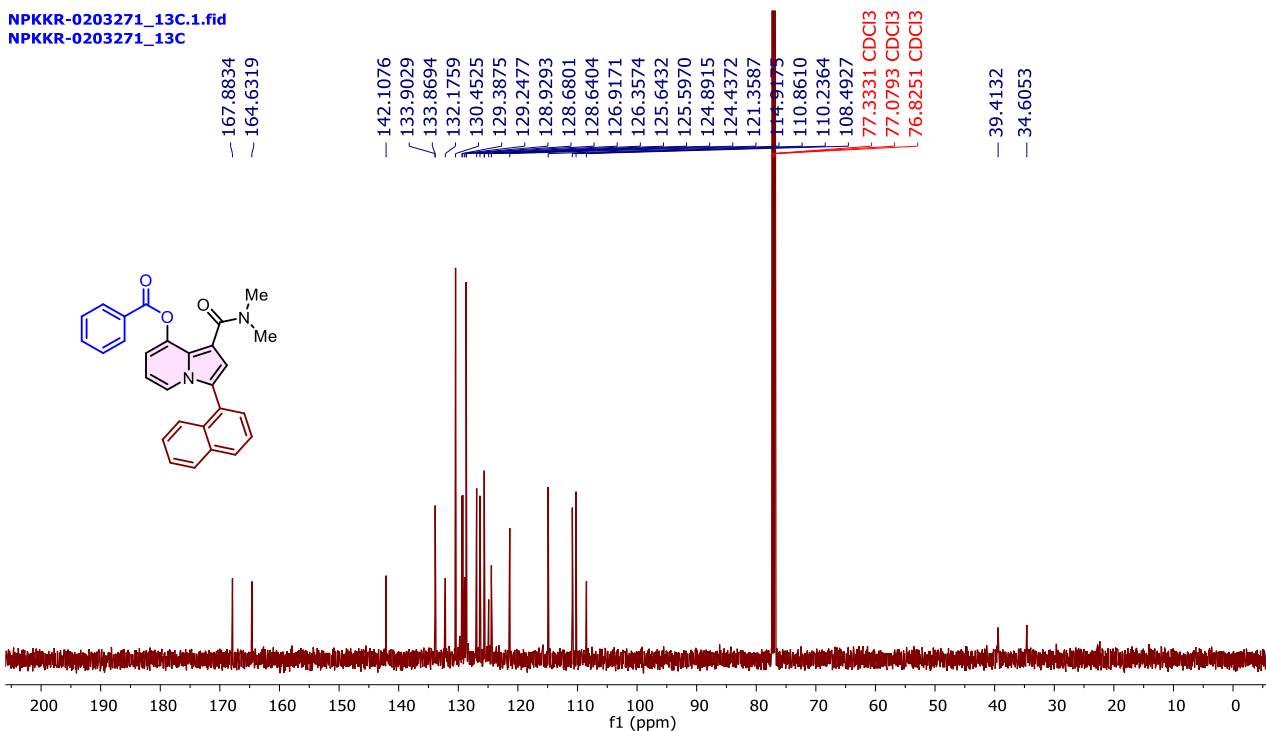

$^{13}\text{C}\{^1\text{H}\}$  NMR (125 MHz,  $\text{CDCl}_3$ ) of 1-(Dimethylcarbamoyl)-3-(naphthalen-1-yl)indolizin-8-yl benzoate. (3ga)

NPKKR-E284 1H.1.fid  
NPKKR-E274 1H

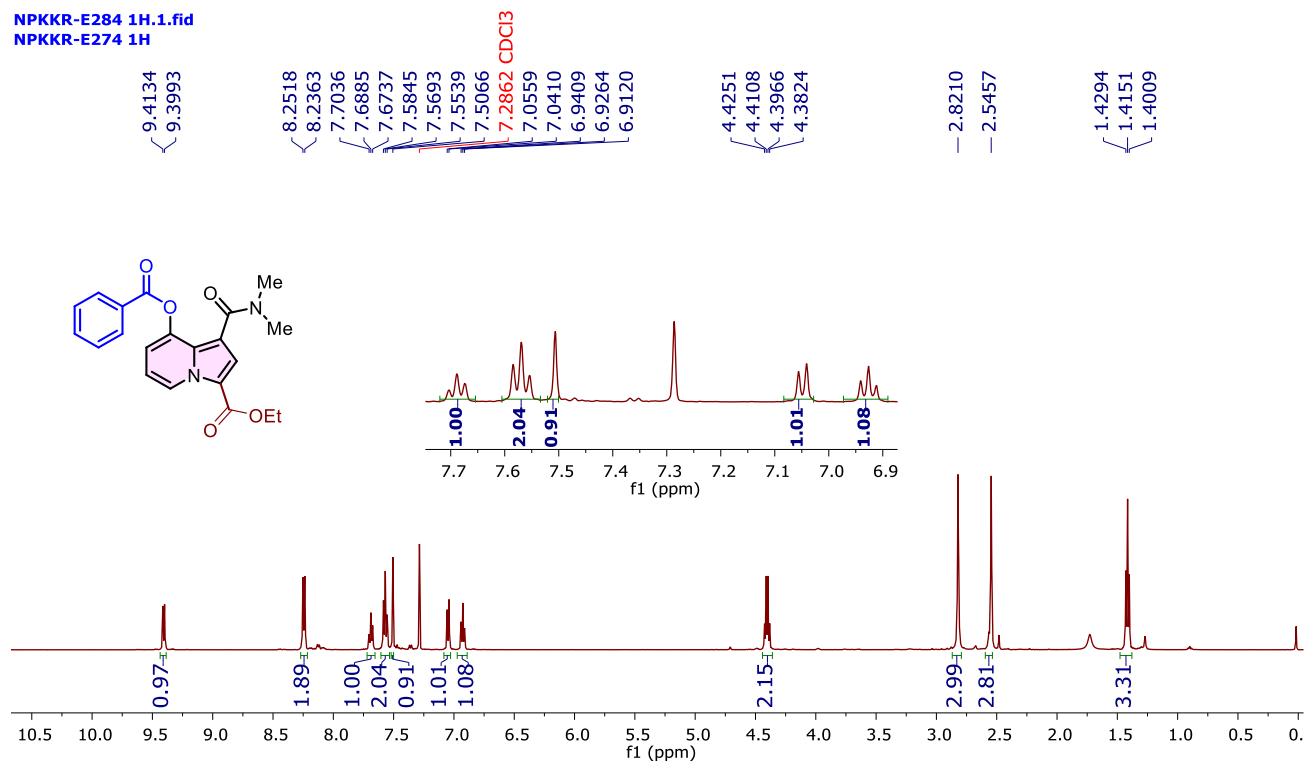

<sup>1</sup>H NMR (500 MHz, CDCl<sub>3</sub>) of Ethyl 8-(benzyloxy)-1-(dimethylcarbamoyl) indolizine-3-carboxylate. (**3ha**)

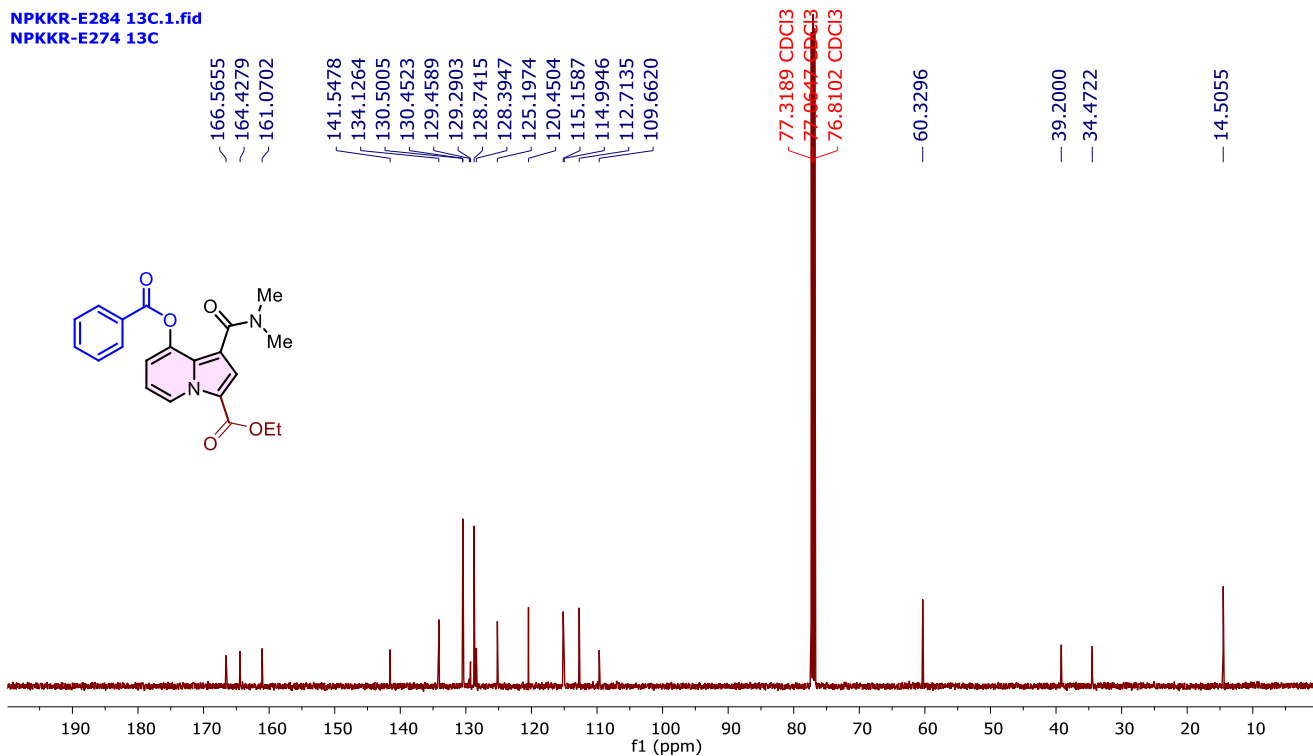

<sup>13</sup>C{<sup>1</sup>H} NMR (125 MHz, CDCl<sub>3</sub>) of Ethyl 8-(benzyloxy)-1-(dimethylcarbamoyl) indolizine-3-carboxylate. (**3ha**)

NPKKR-E312R\_1H.1.fid  
NPKKR-E312R\_1H

9.9000  
9.8982  
9.8860  
9.8843

8.2580  
8.2553  
8.2416  
8.2385  
7.8428  
7.8404  
7.8374  
7.8267  
7.8234  
7.7159  
7.7132  
7.7105  
7.7019  
7.6983  
7.6947  
7.6860  
7.6833  
7.6806  
7.5937  
7.5780  
7.5628  
7.5234  
7.5079  
7.4935  
7.3392  
7.2848 CDCl<sub>3</sub>  
7.2275  
7.2258  
7.2125  
7.2108  
7.0793  
7.0647  
7.0500  
2.8019  
2.5328

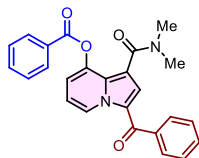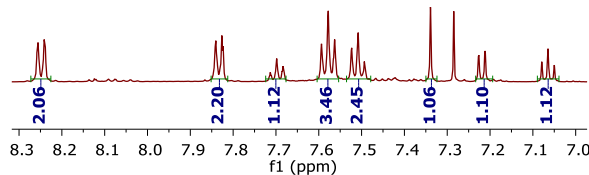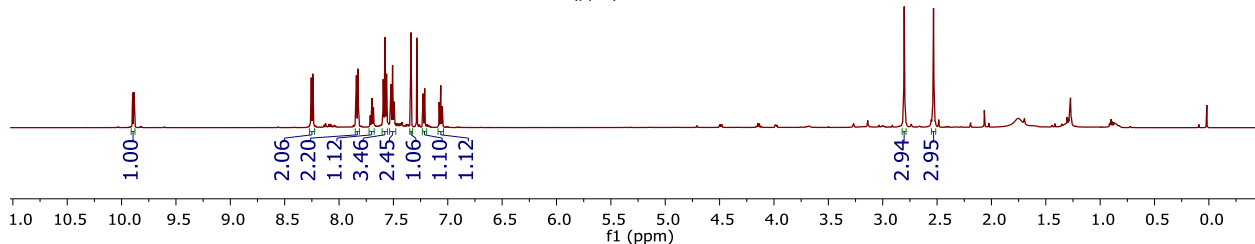

<sup>1</sup>H NMR (500 MHz, CDCl<sub>3</sub>) of 3-benzoyl-1-(dimethylcarbamoyl)indolizin-8-yl benzoate (**3ia**)

NPKKR-E312R\_13C.1.fid  
NPKKR-E312R\_13C

185.1926

166.3196  
164.3696

141.4047  
139.9817  
134.2163  
131.4676  
130.6142  
130.4487  
129.0013  
128.7824  
128.3655  
128.2919  
126.4800  
124.9511  
122.8520  
117.6868  
113.8584  
110.6894

77.3023 CDCl<sub>3</sub>  
77.0463 CDCl<sub>3</sub>  
76.7926 CDCl<sub>3</sub>

39.1504  
34.4868

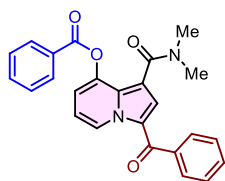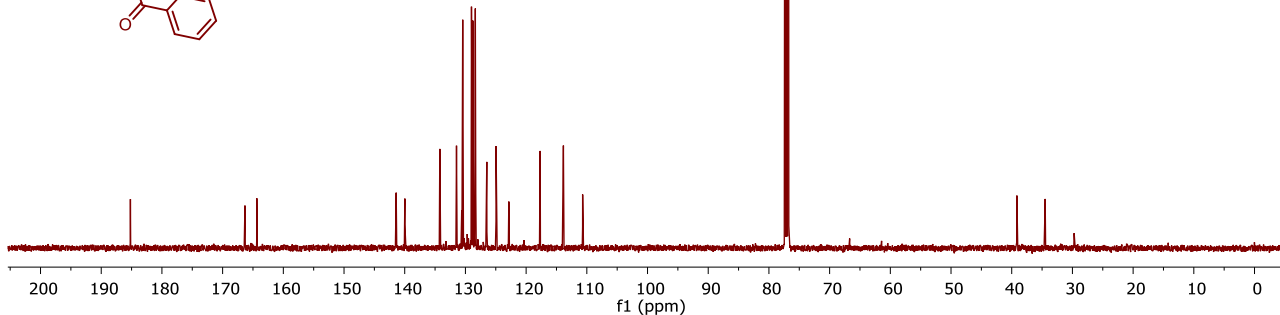

<sup>13</sup>C{<sup>1</sup>H} NMR (125 MHz, CDCl<sub>3</sub>) of 3-benzoyl-1-(dimethylcarbamoyl)indolizin-8-yl benzoate (**3ia**)

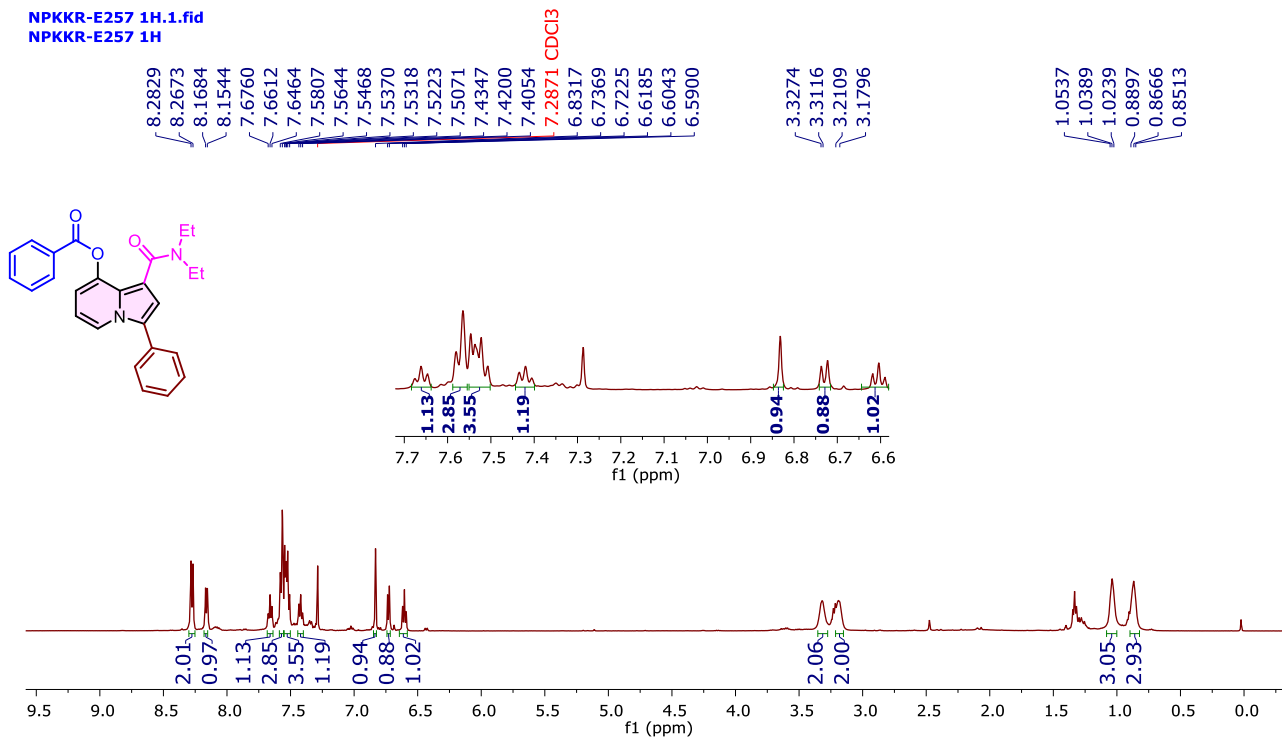

<sup>1</sup>H NMR (500 MHz, CDCl<sub>3</sub>) of 1-(Diethylcarbamoyl)-3-phenylindolizin-8-yl benzoate. (**3ja**).

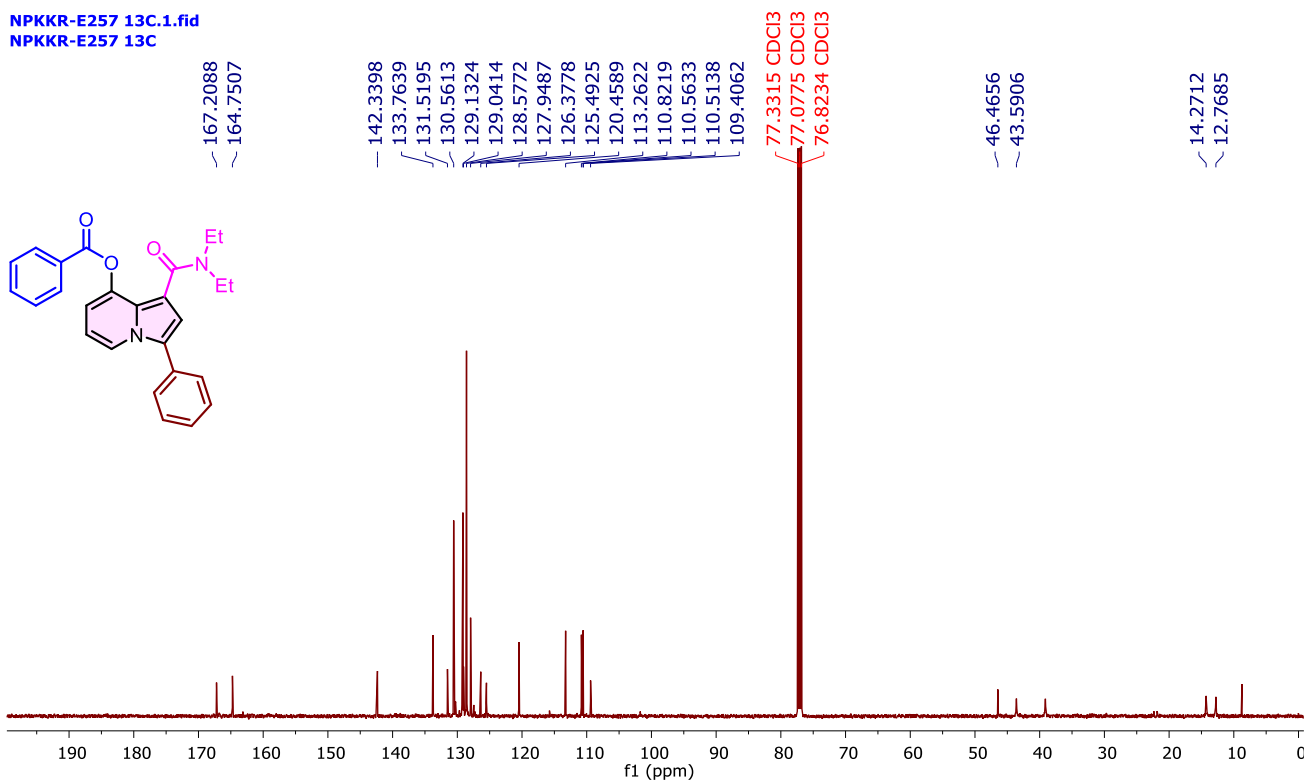

<sup>13</sup>C{<sup>1</sup>H} NMR (125 MHz, CDCl<sub>3</sub>) of 1-(Diethylcarbamoyl)-3-phenylindolizin-8-yl benzoate. (**3ja**).

NPKKR-1410\_1H.1.fid  
NPKKR-1410\_1H

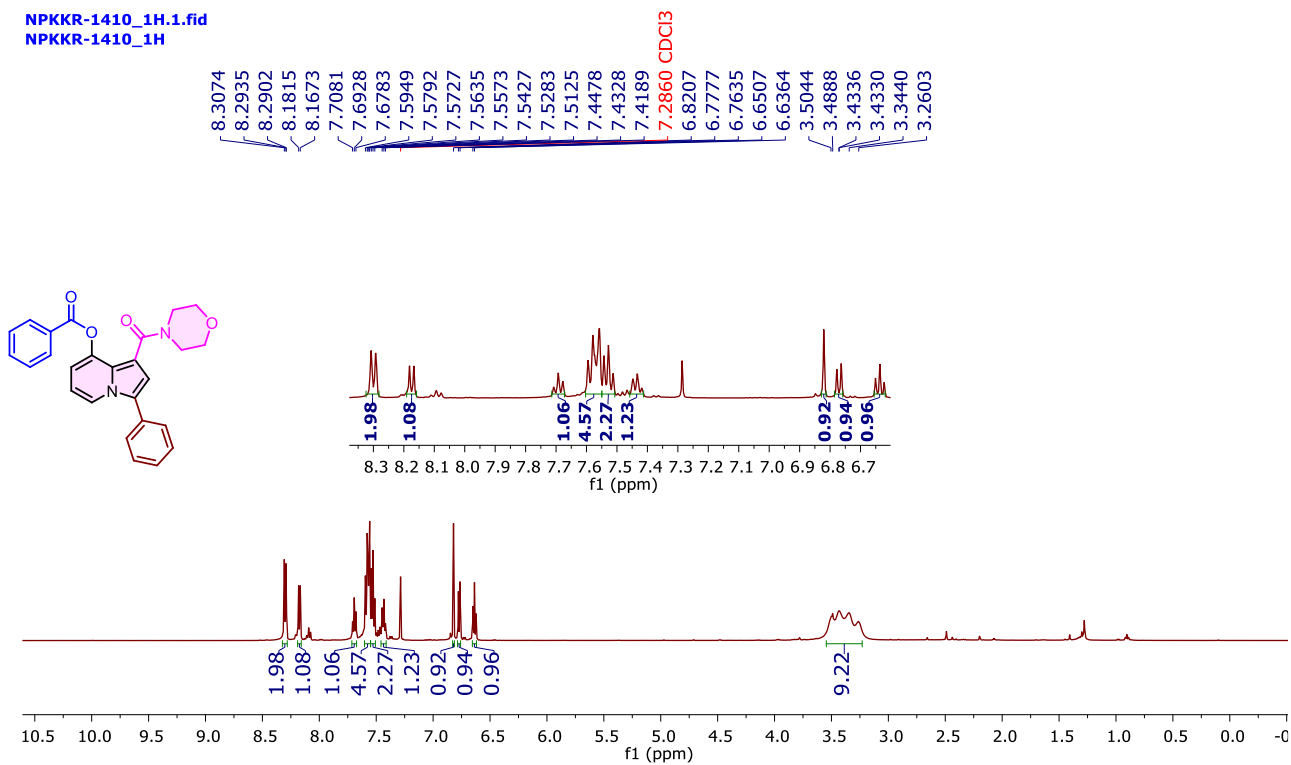

<sup>1</sup>H NMR (500 MHz, CDCl<sub>3</sub>) of 1-(Morpholine-4-carbonyl)-3-phenylindolizin-8-yl benzoate. (3ka)

NPKKR-1410\_13C.1.fid  
NPKKR-1410\_13C

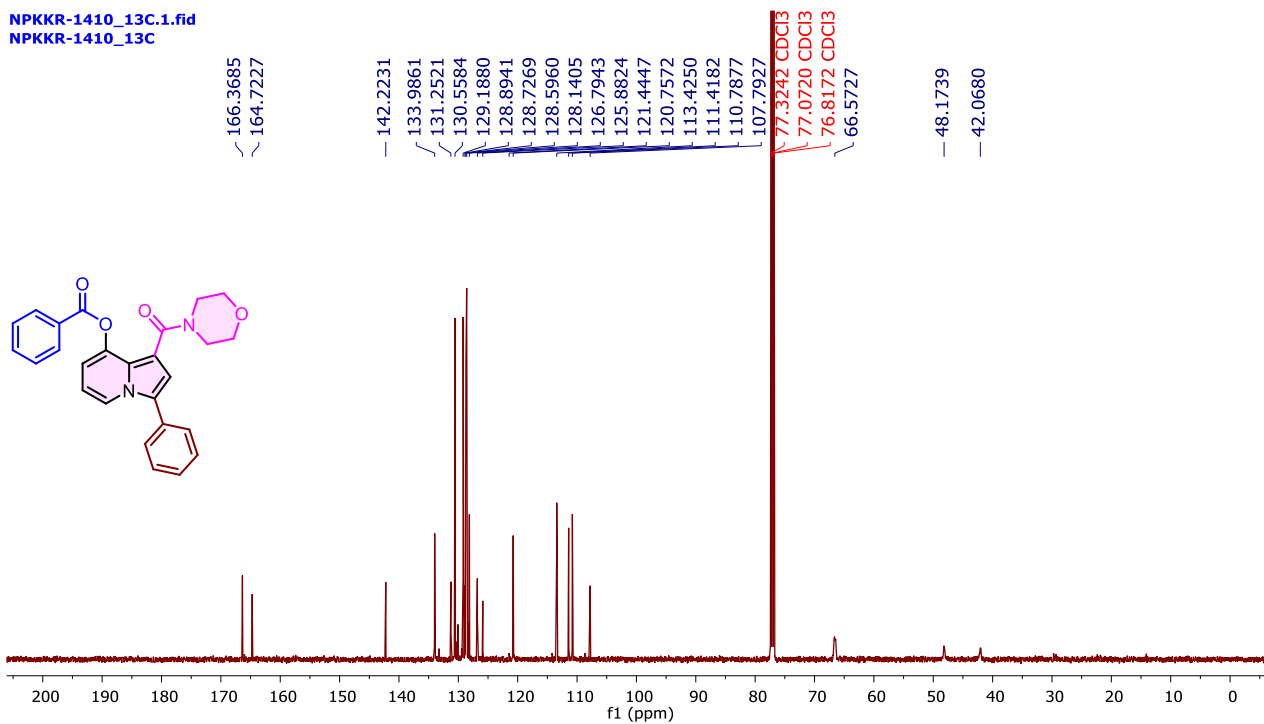

<sup>13</sup>C{<sup>1</sup>H} NMR (500 MHz, CDCl<sub>3</sub>) of 1-(Morpholine-4-carbonyl)-3-phenylindolizin-8-yl benzoate. (3ka)

NPKKR-E210 1H.1.fid  
NPKKR-E210 1H

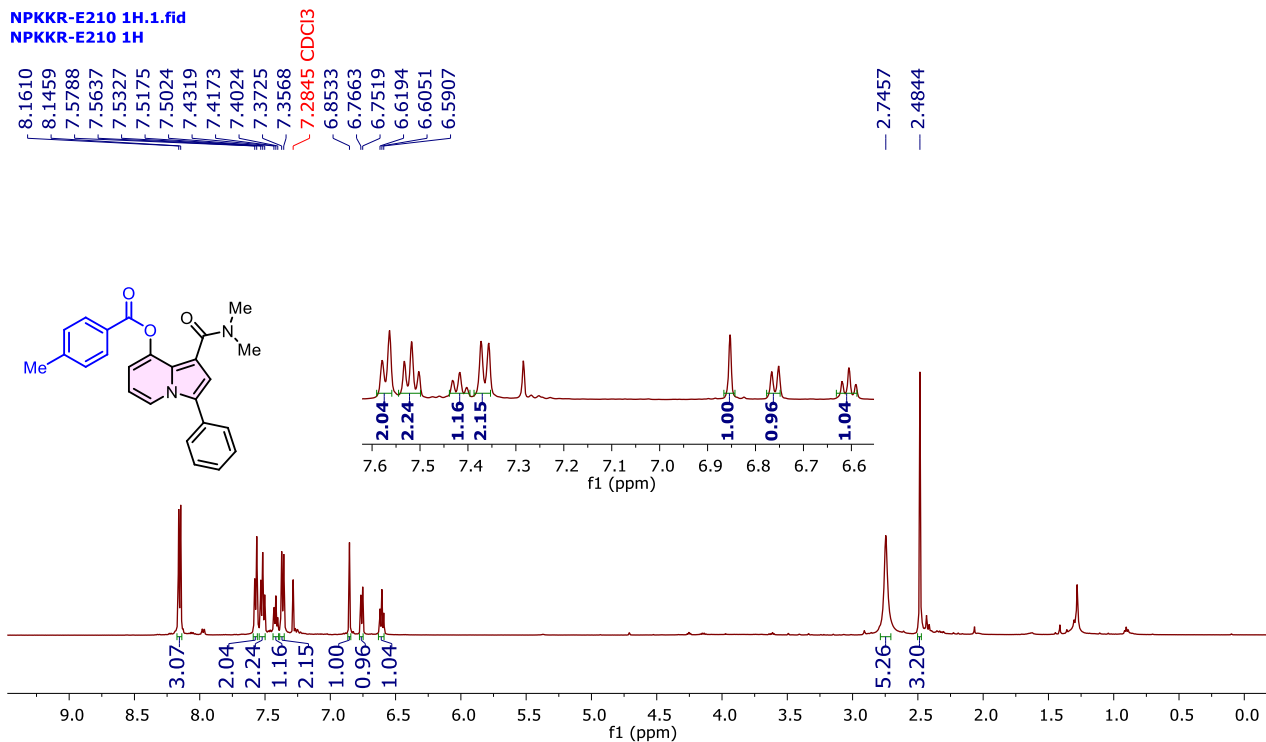

$^1\text{H}$  NMR (500 MHz,  $\text{CDCl}_3$ ) of 1-(Dimethylcarbamoyl)-3-phenylindolizin-8-yl 4-methyl benzoate (**3ab**)

NPKKR-E210 13C.1.fid  
NPKKR-E210 13C

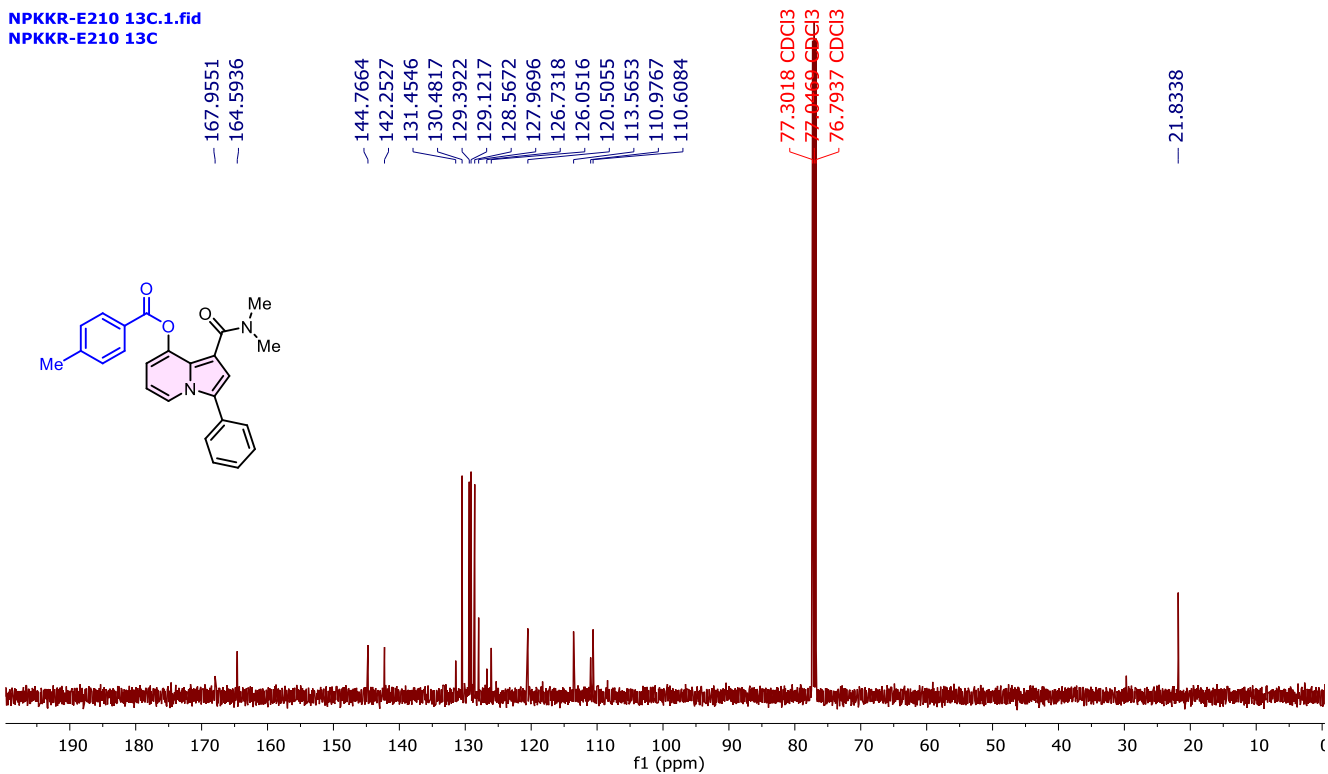

$^{13}\text{C}\{^1\text{H}\}$ -NMR (125 MHz,  $\text{CDCl}_3$ ) of 1-(Dimethylcarbamoyl)-3-phenylindolizin-8-yl 4-methyl benzoate (**3ab**)

NPKKR-E237R 1H.1.fid  
NPKKR-E237R 1H

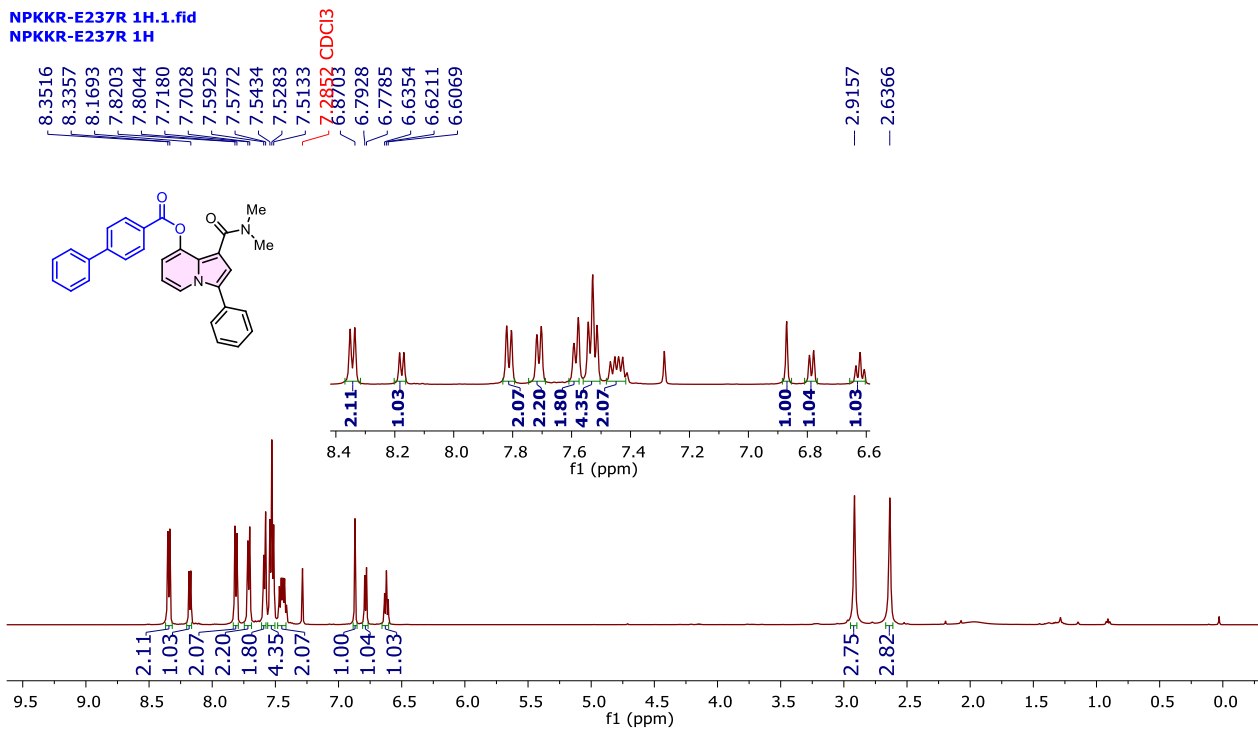

$^1\text{H}$  NMR (500 MHz,  $\text{CDCl}_3$ ) of 1-(Dimethylcarbamoyl)-3-phenylindolizin-8-yl [1,1'-biphenyl]-4-carboxylate. (**3ac**)

NPKKR-E237R 13C.1.fid  
NPKKR-E237R 13C

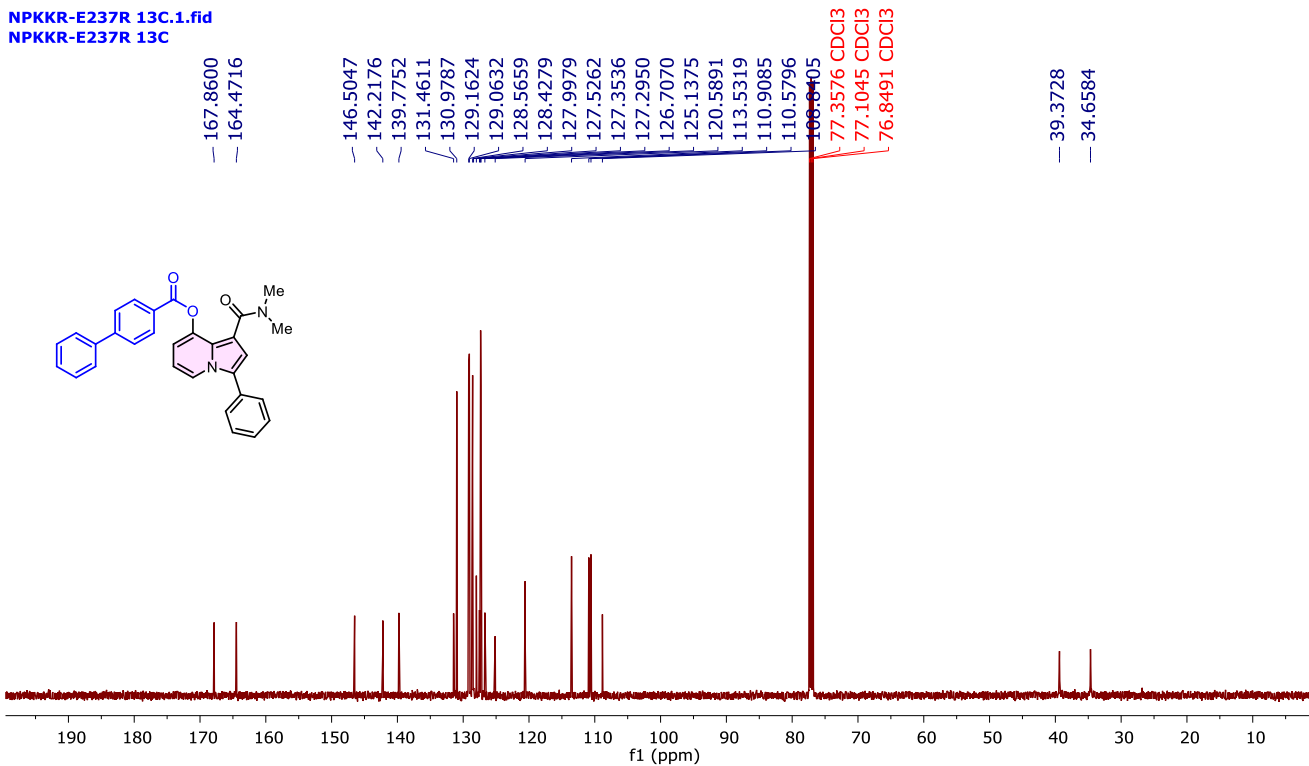

$^{13}\text{C}\{^1\text{H}\}$  NMR (125 MHz,  $\text{CDCl}_3$ ) of 1-(Dimethylcarbamoyl)-3-phenylindolizin-8-yl [1,1'-biphenyl]-4-carboxylate. (**3ac**)

NPKKR-E256 1H.1.fid  
NPKKR-E256 1H

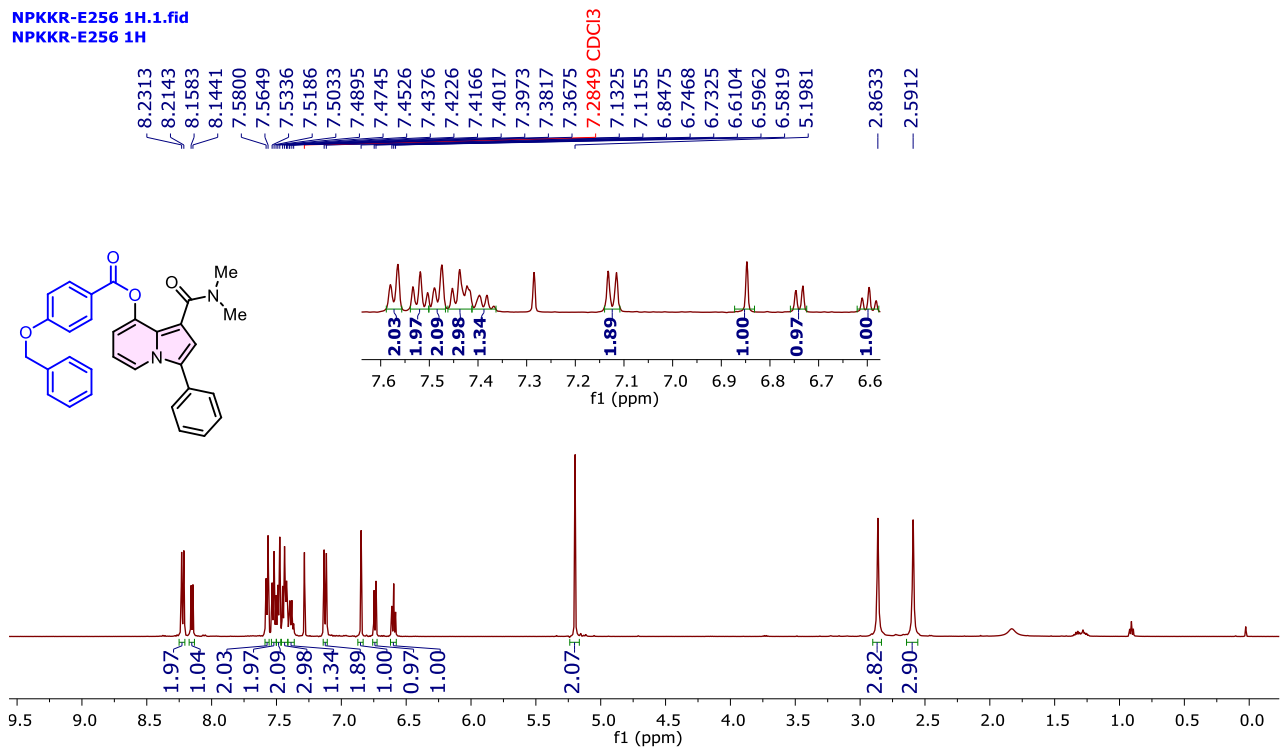

<sup>1</sup>H NMR (500 MHz, CDCl<sub>3</sub>) of 1-(Dimethylcarbamoyl)-3-phenylindolizin-8-yl 4-(benzyloxy) benzoate. (3ad)

NPKKR-E256 13C.1.fid  
NPKKR-E256 13C

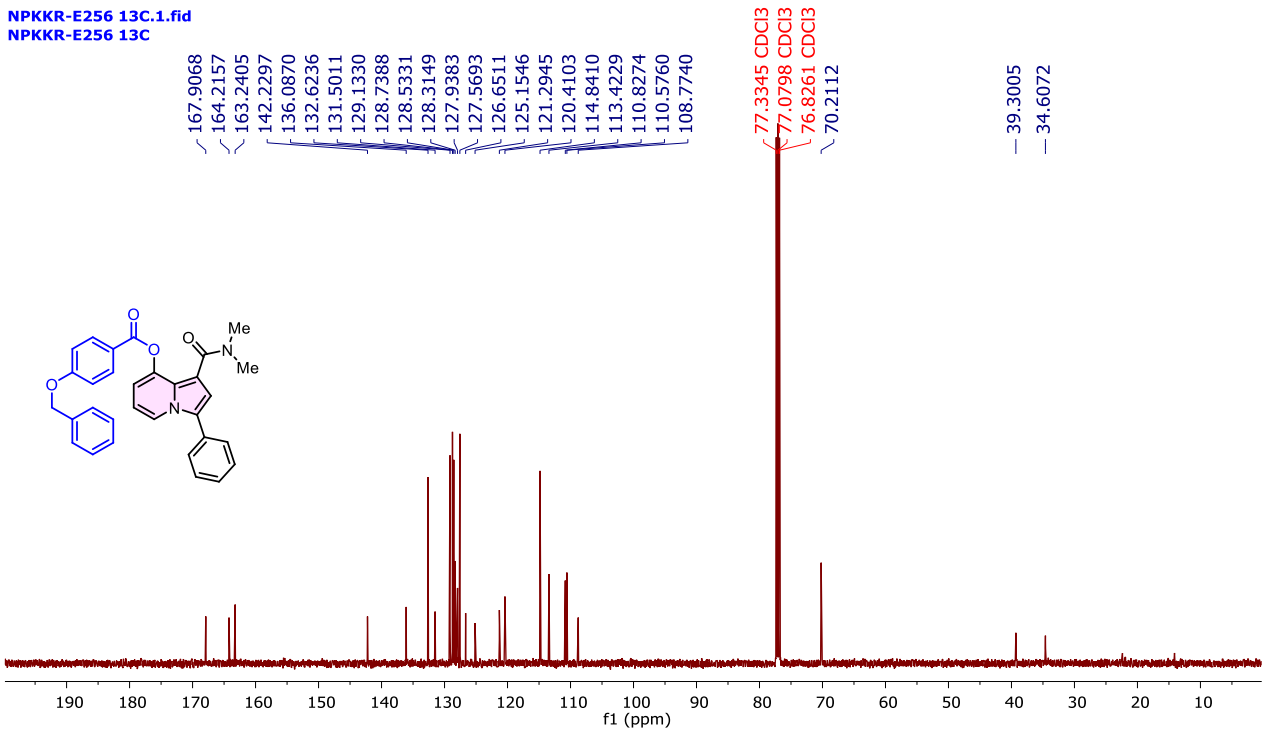

<sup>13</sup>C{<sup>1</sup>H} NMR (125 MHz, CDCl<sub>3</sub>) of 1-(Dimethylcarbamoyl)-3-phenylindolizin-8-yl 4-(benzyloxy) benzoate. (3ad)

NPKKR-0202234\_1H.1.fid  
NPKKR-0202234\_1H

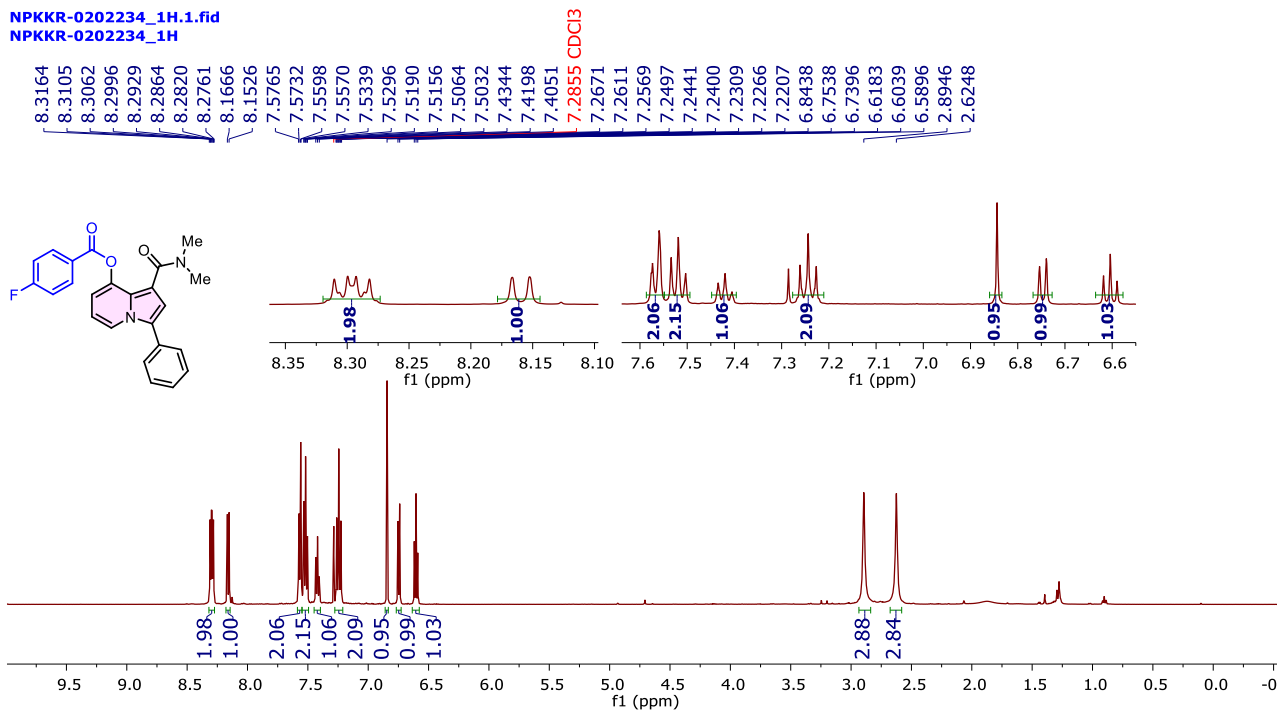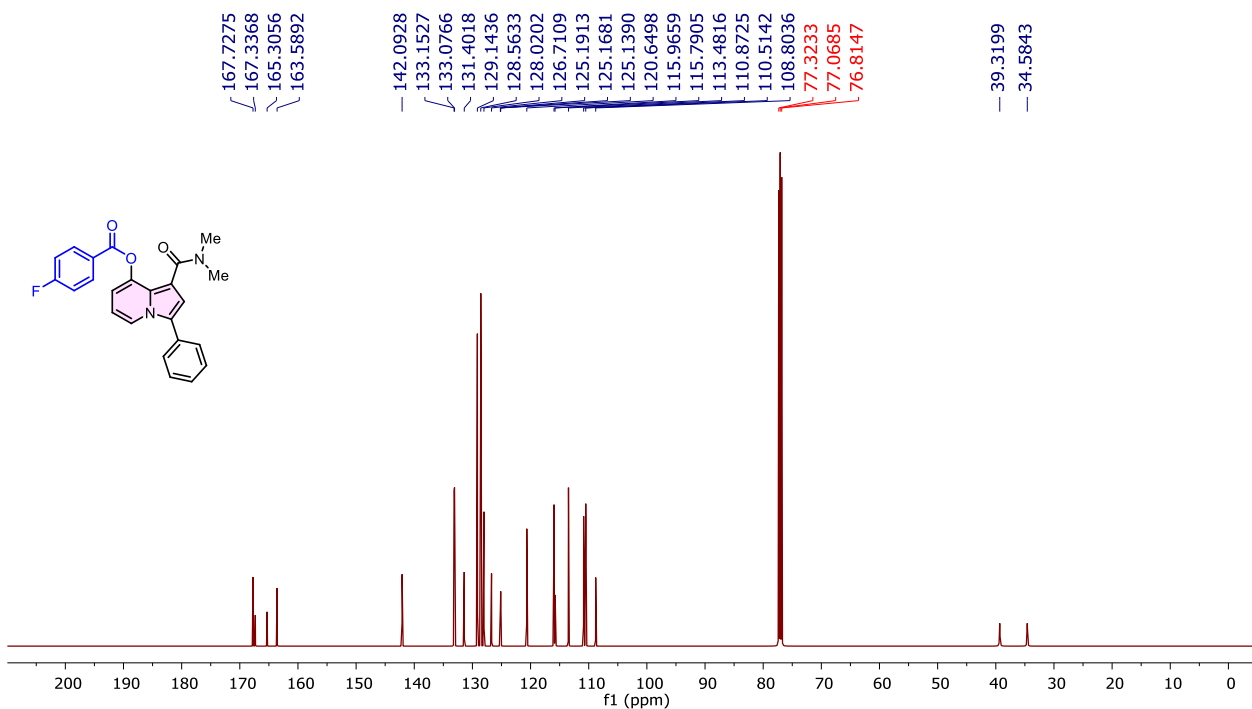

NPPKR-234 F1 19F.1.fid  
NPPKR-234 F1 19F

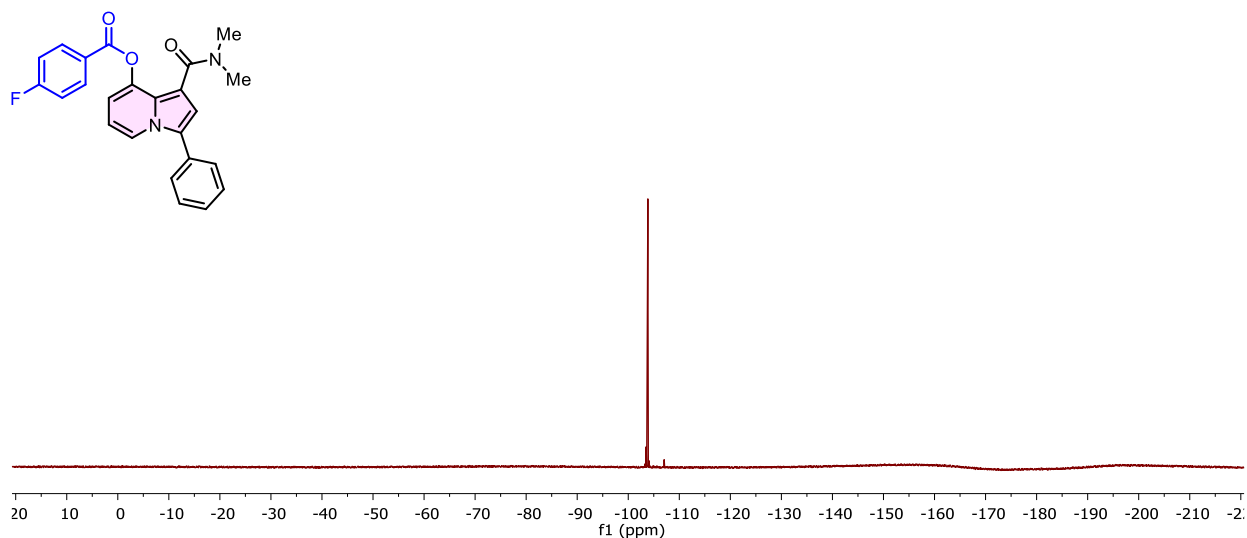

<sup>19</sup>F NMR (470 MHz, CDCl<sub>3</sub>) 1-(Dimethylcarbamoyl)-3-phenylindolizin-8-yl 4-fluoro benzoate (3ae)

NPKKR-E255 1H.1.fid  
NPKKR-E255 1H

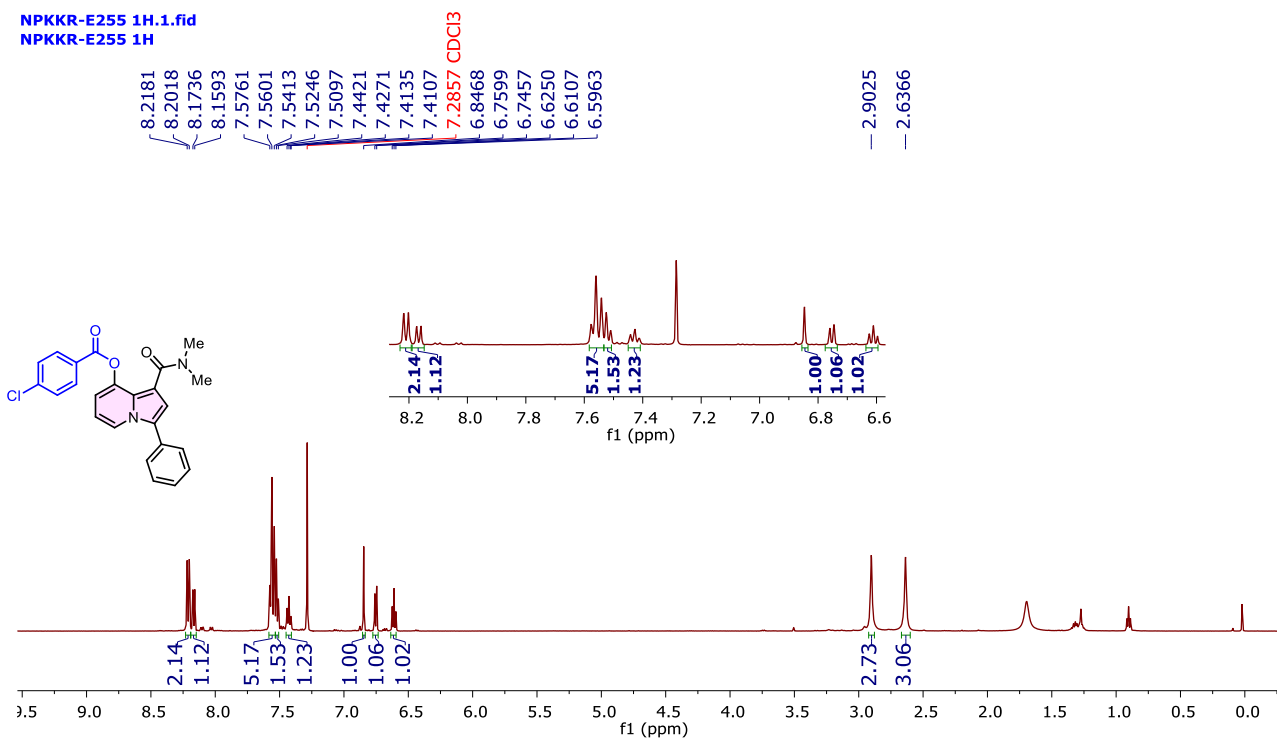

<sup>1</sup>H NMR (500 MHz, CDCl<sub>3</sub>) of 1-(Dimethylcarbamoyl)-3-phenylindolizin-8-yl 4-chloro benzoate. (3af)

NPKKR-E255 13C.1.fid  
NPKKR-E255 13C

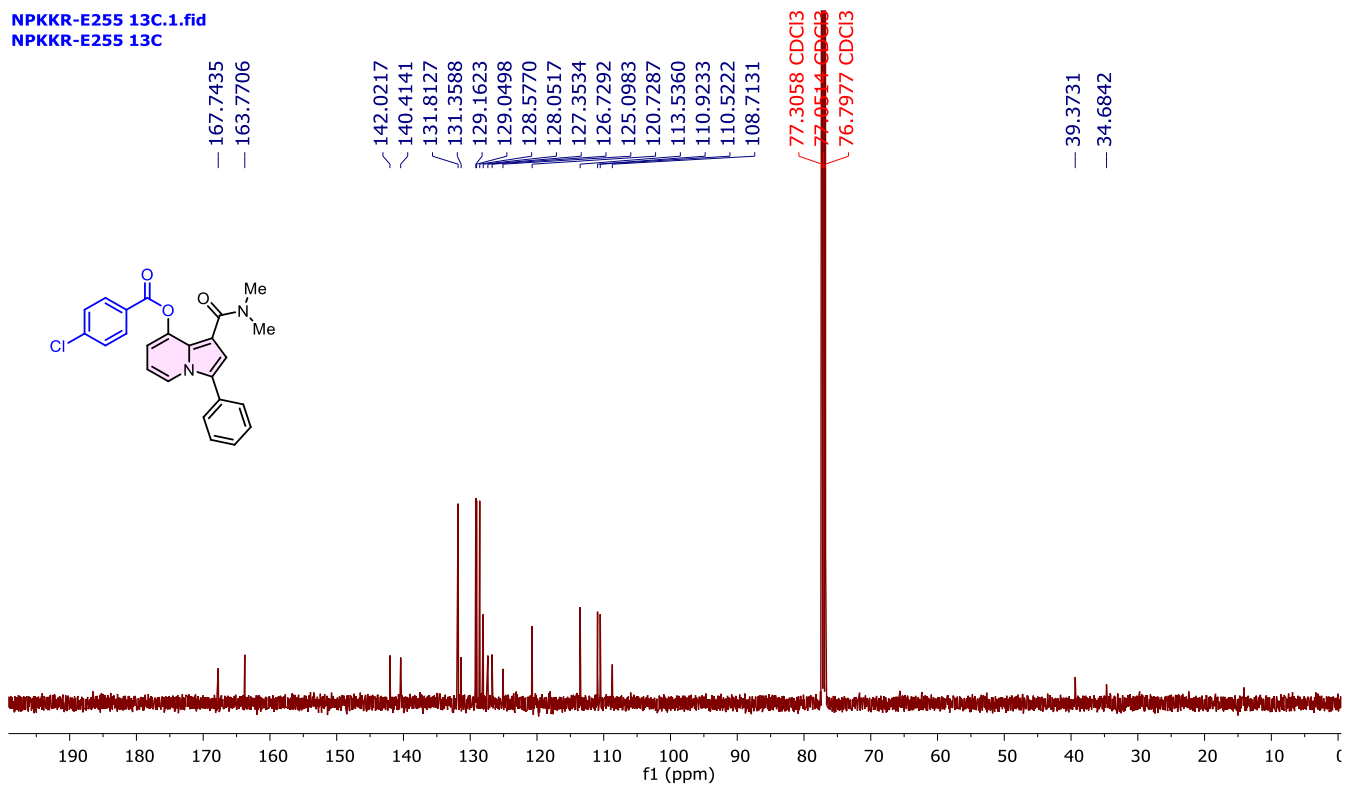

<sup>13</sup>C NMR (125 MHz, CDCl<sub>3</sub>) of 1-(Dimethylcarbamoyl)-3-phenylindolizin-8-yl 4-chloro benzoate. (3af)

NPKKR-E236R 1H.1.fid  
NPKKR-E236R 1H

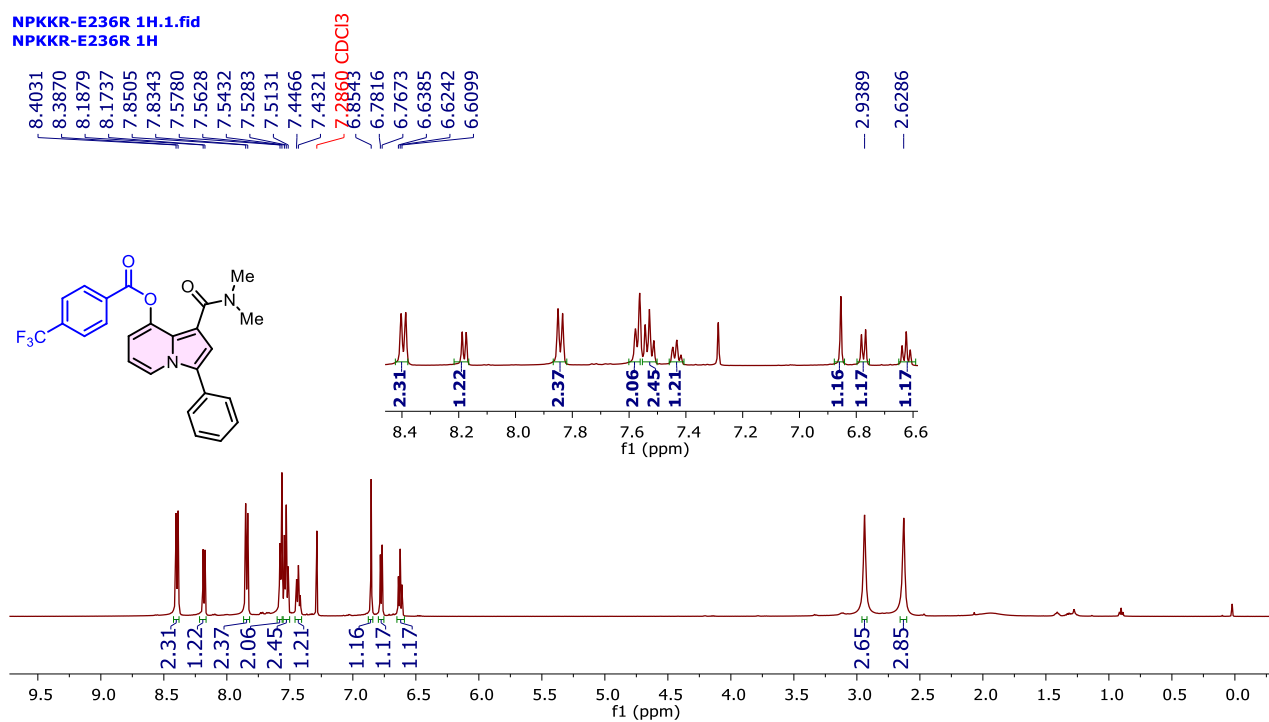

<sup>1</sup>H NMR (500 MHz, CDCl<sub>3</sub>) of 1-(Dimethylcarbamoyl)-3-phenylindolizin-8-yl 4-(trifluoromethyl) benzoate. (3ag)

NPKKR-E236R 13C.1.fid  
NPKKR-E236R 13C

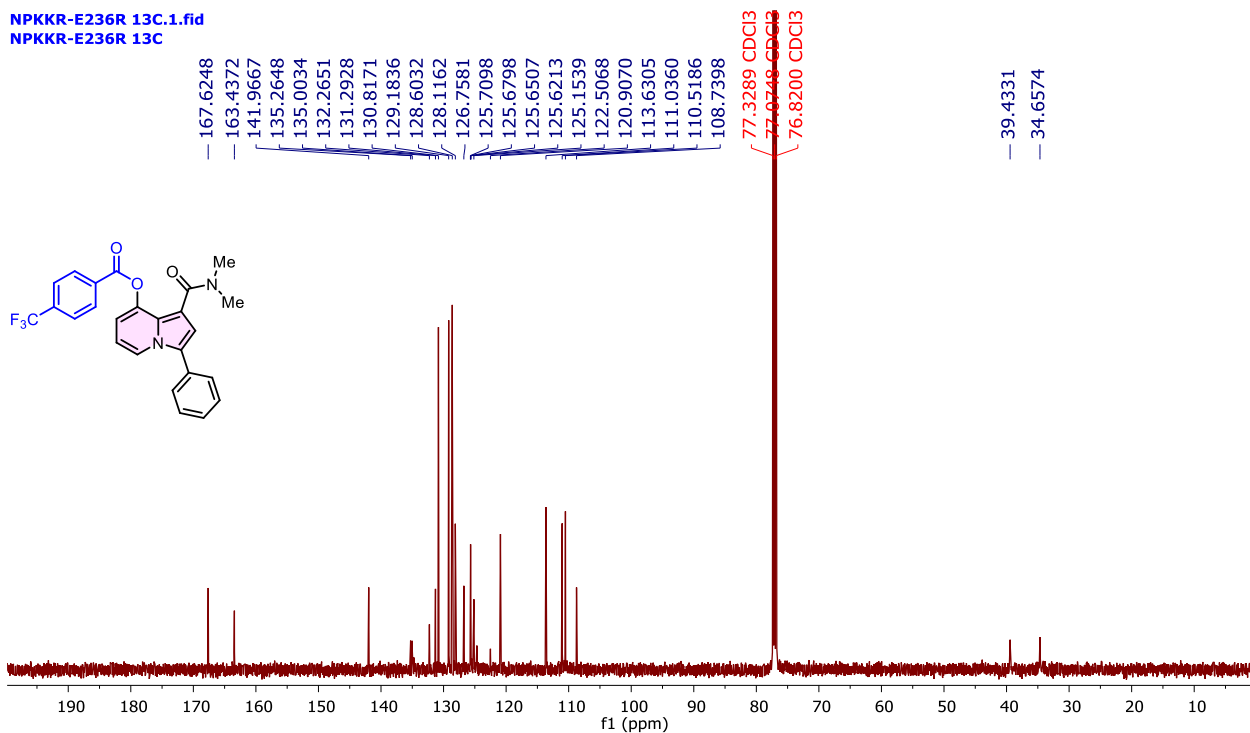

<sup>13</sup>C{<sup>1</sup>H} NMR (125 MHz, CDCl<sub>3</sub>) of 1-(Dimethylcarbamoyl)-3-phenylindolizin-8-yl 4-(trifluoromethyl) benzoate. (**3ag**)

NPKKR-E236 R 19F.1.fid  
NPKKR-E236 19F

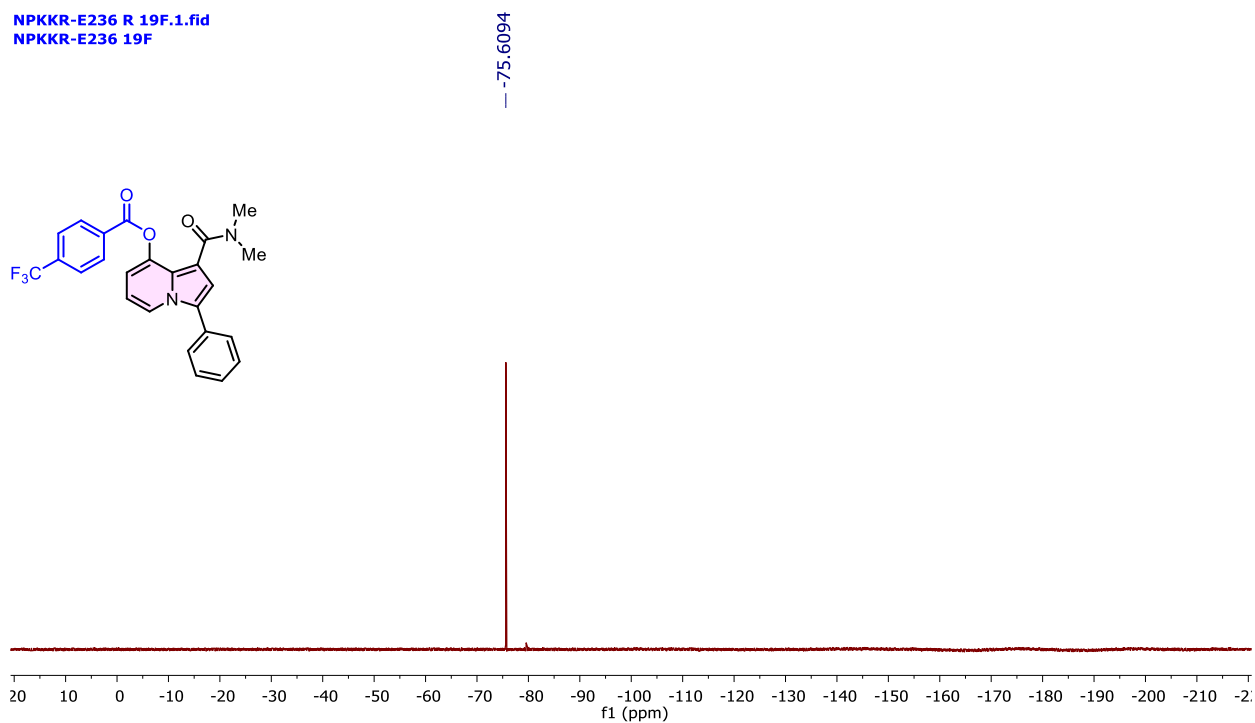

<sup>19</sup>F NMR (470 MHz, CDCl<sub>3</sub>) of 1-(Dimethylcarbamoyl)-3-phenylindolizin-8-yl 4-(trifluoromethyl) benzoate. (**3ag**)

NPKKR-E251 1H.1.fid  
NPKKR-E251 1H

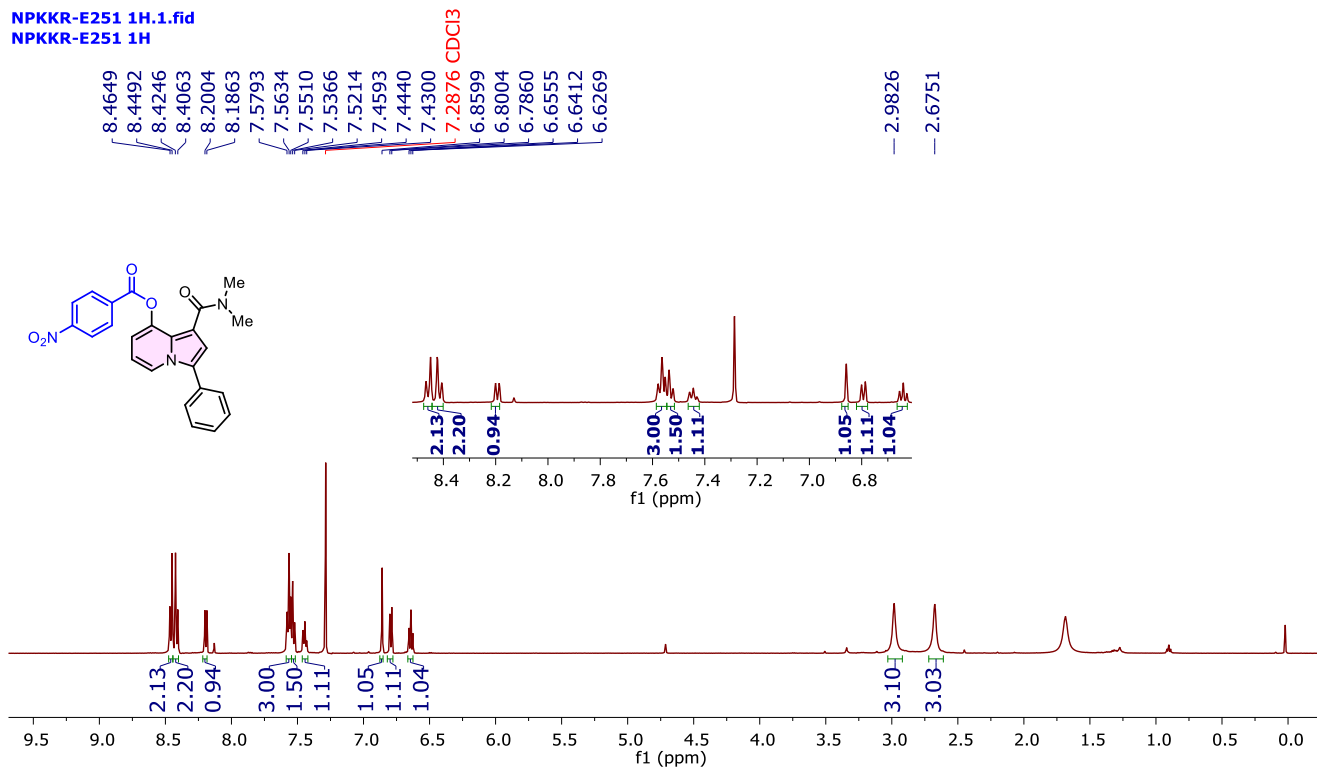

<sup>1</sup>H NMR (500 MHz, CDCl<sub>3</sub>) of 1-(Dimethylcarbamoyl)-3-phenylindolizin-8-yl 4-nitro benzoate. (**3ah**)

NPKKR-E251 13C.1.fid  
NPKKR-E251 13C

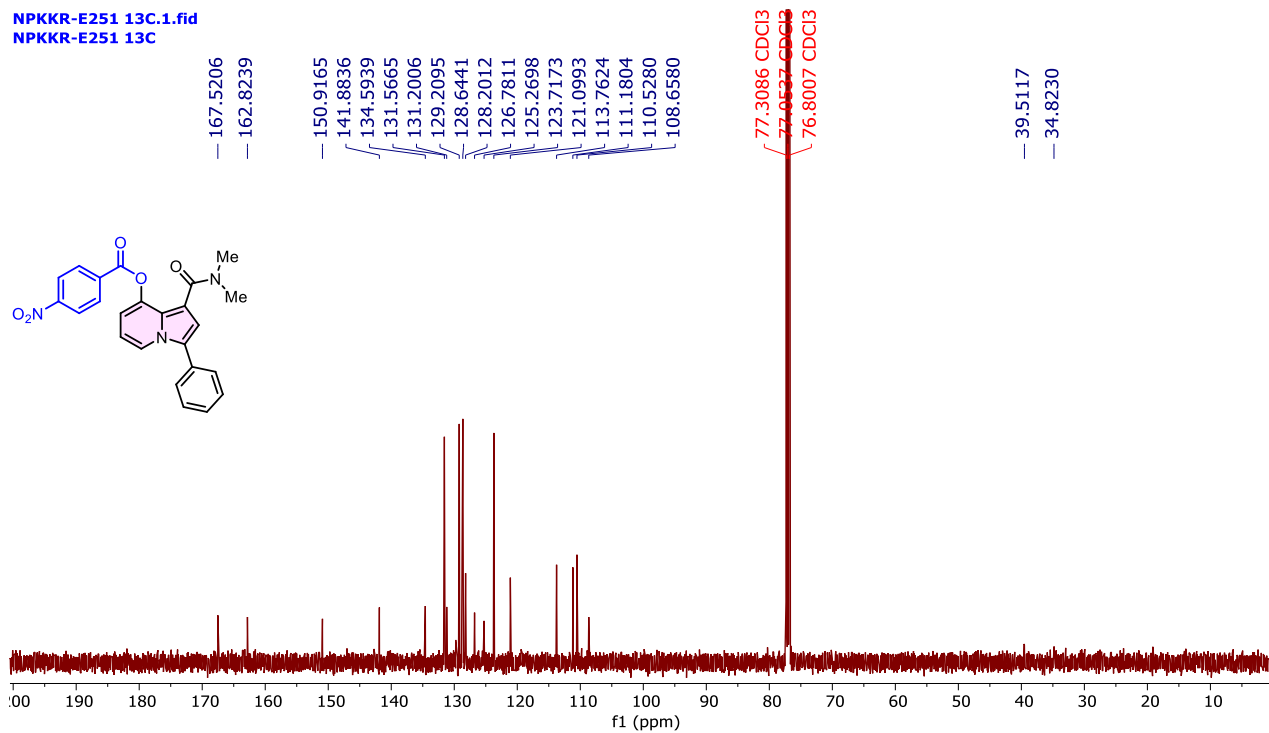

<sup>13</sup>C {<sup>1</sup>H} NMR (125 MHz, CDCl<sub>3</sub>) of 1-(Dimethylcarbamoyl)-3-phenylindolizin-8-yl 4-nitro benzoate. (**3ah**)

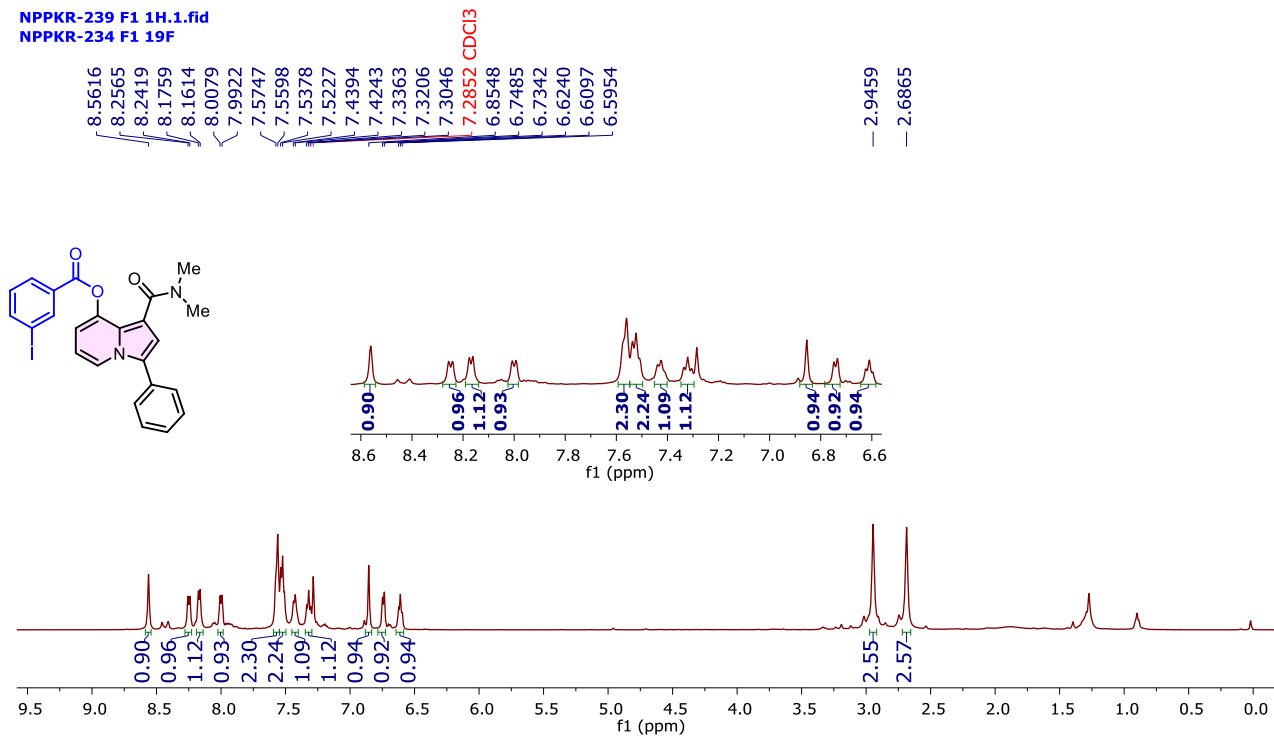

$^1\text{H}$  NMR (500 MHz,  $\text{CDCl}_3$ ) of 1-(Dimethylcarbamoyl)-3-phenylindolizin-8-yl 3-iodo benzoate. (**3ai**)

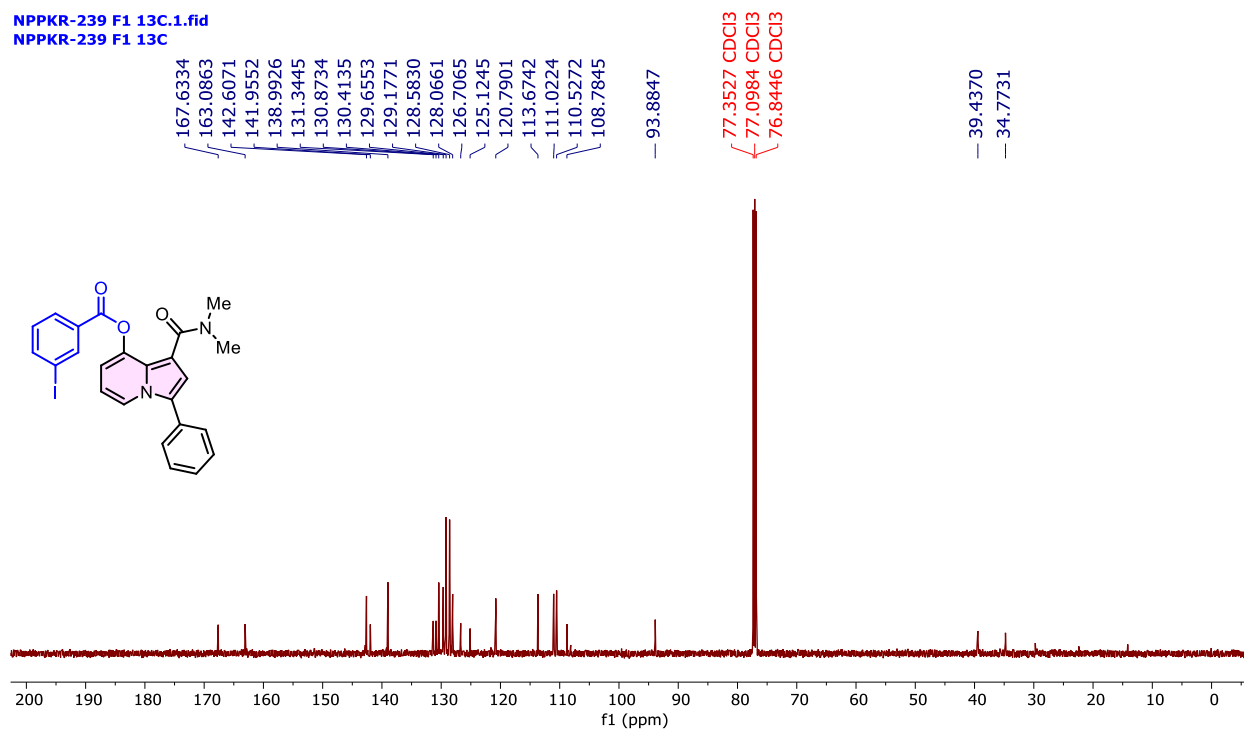

$^{13}\text{C}\{^1\text{H}\}$  NMR (125 MHz,  $\text{CDCl}_3$ ) of 1-(Dimethylcarbamoyl)-3-phenylindolizin-8-yl 3-iodo benzoate. (**3ai**)

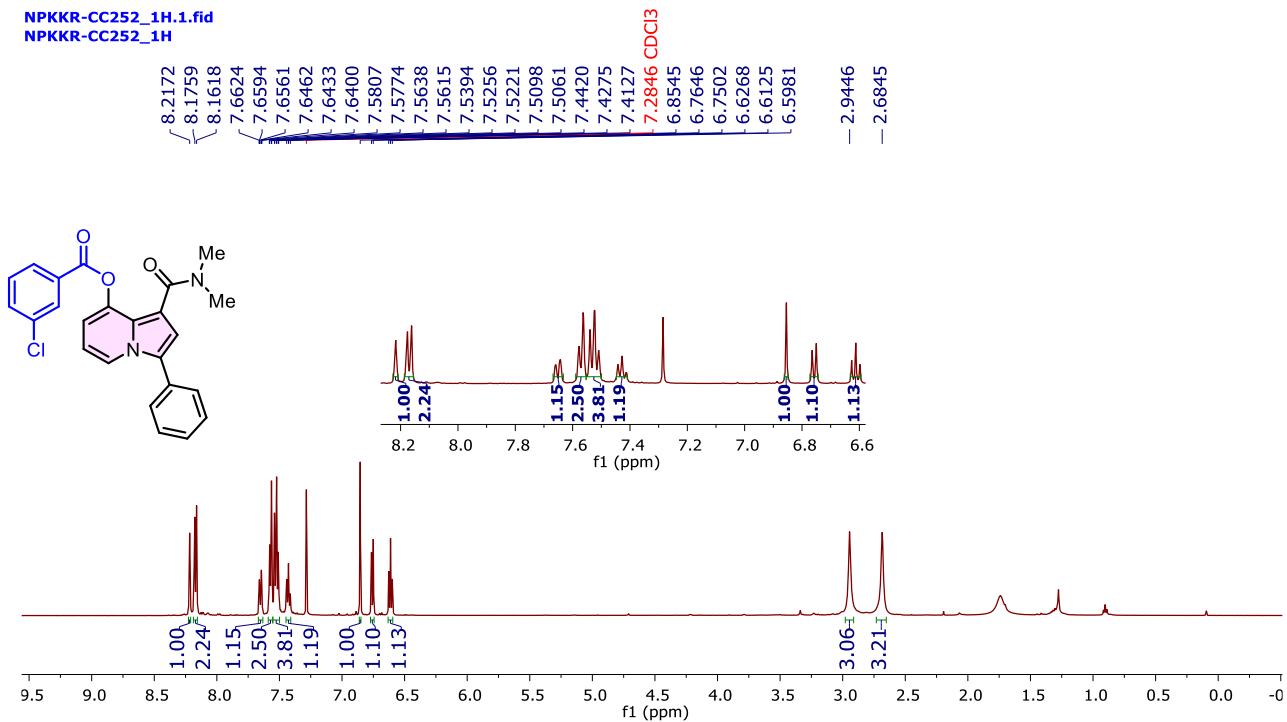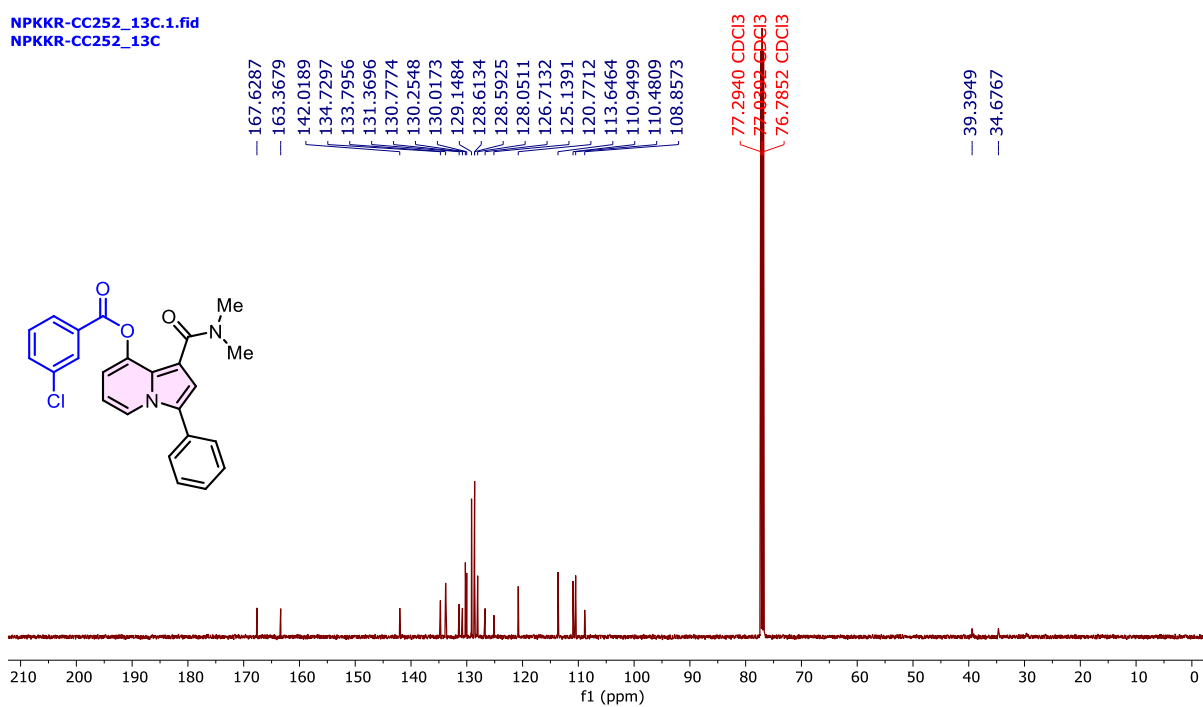

NPKKR-E254 1H.2.fid  
NPKKR-E254 1H

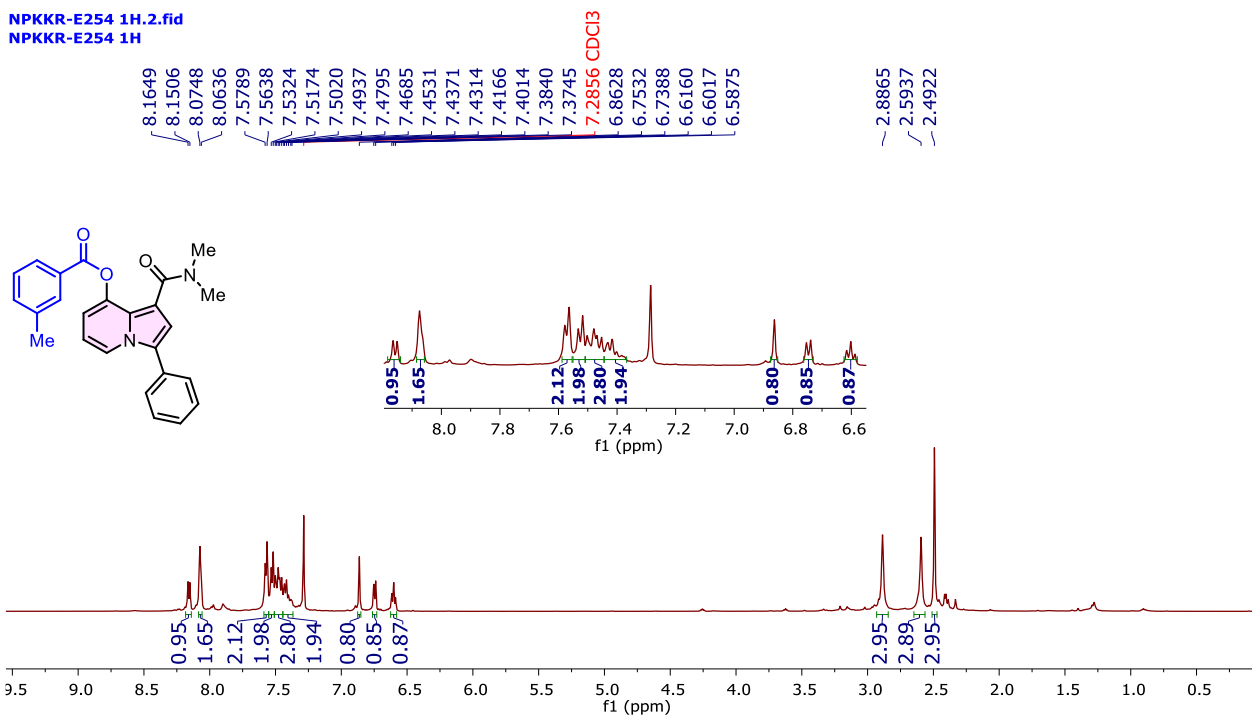

<sup>1</sup>H NMR (500 MHz, CDCl<sub>3</sub>) of 1-(Dimethylcarbamoyl)-3-phenylindolizin-8-yl 3-methylbenzoate. (3ak).

NPKKR-E254 13C.3.fid  
NPKKR-E254 13C

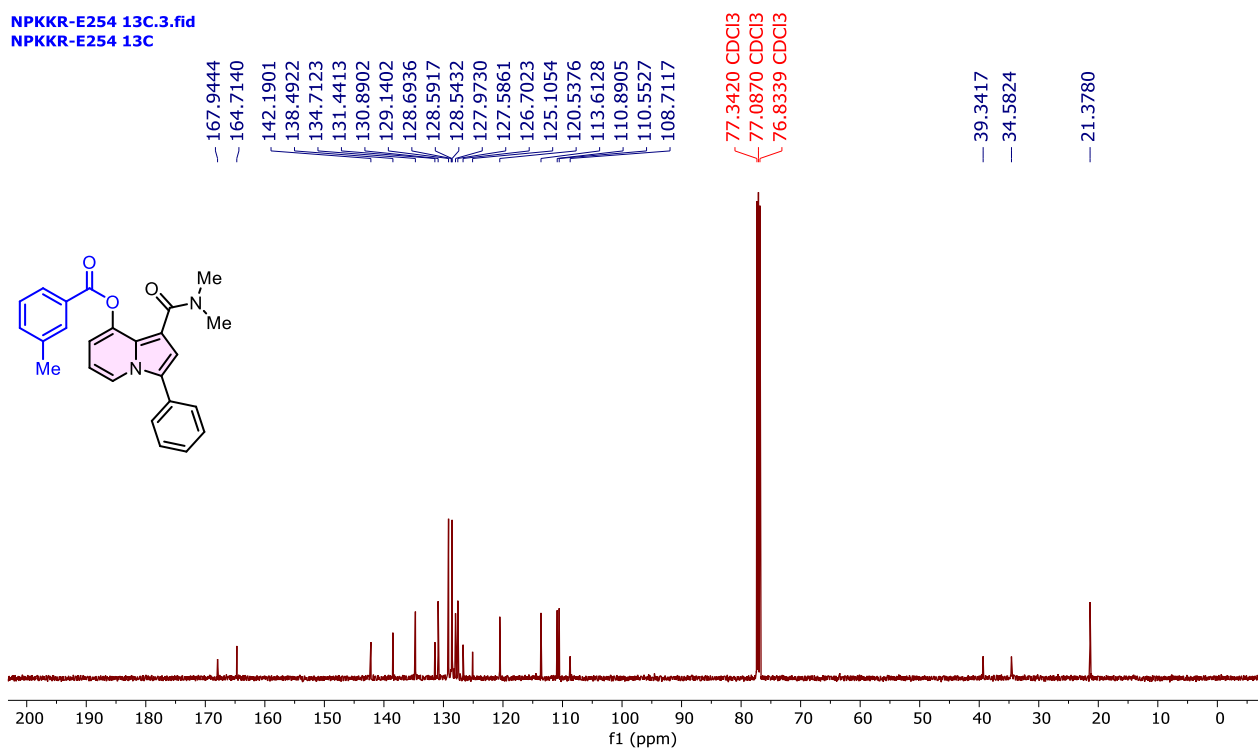

<sup>13</sup>C NMR (125 MHz, CDCl<sub>3</sub>) of 1-(Dimethylcarbamoyl)-3-phenylindolizin-8-yl 3-methylbenzoate. (3ak).

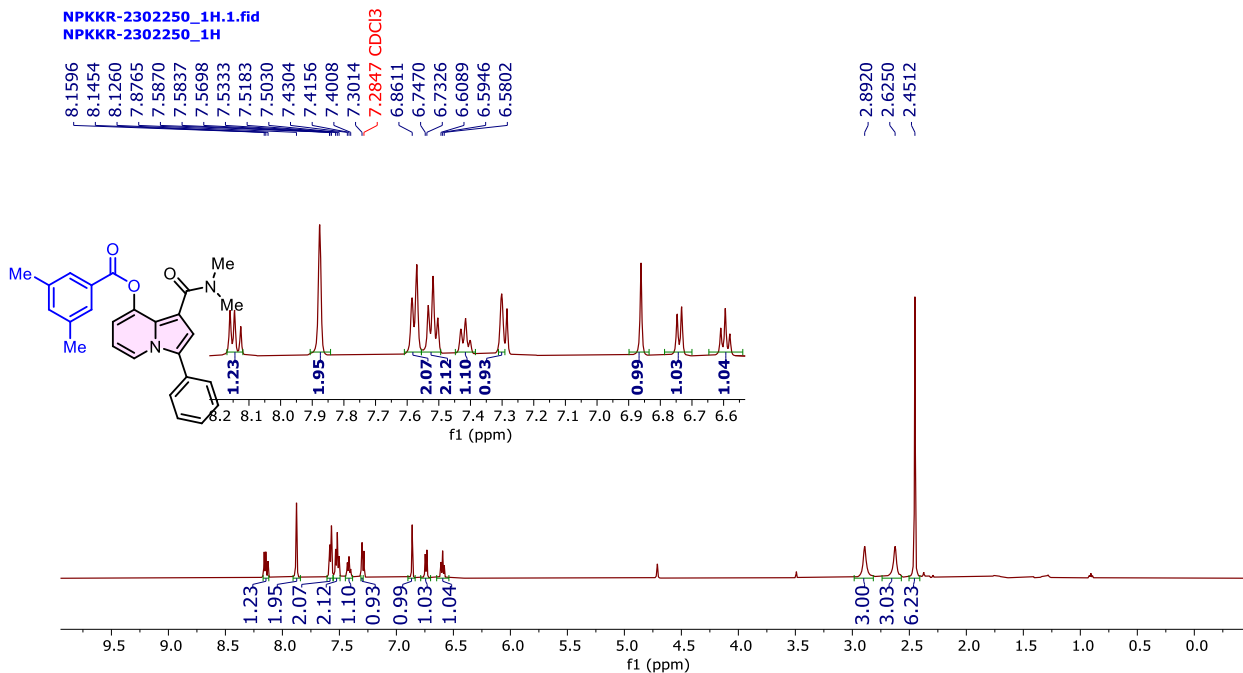

<sup>1</sup>H NMR (500 MHz, CDCl<sub>3</sub>) of 1-(Dimethylcarbamoyl)-3-phenylindolizin-8-yl 3,5-dimethyl benzoate. (**3a**).

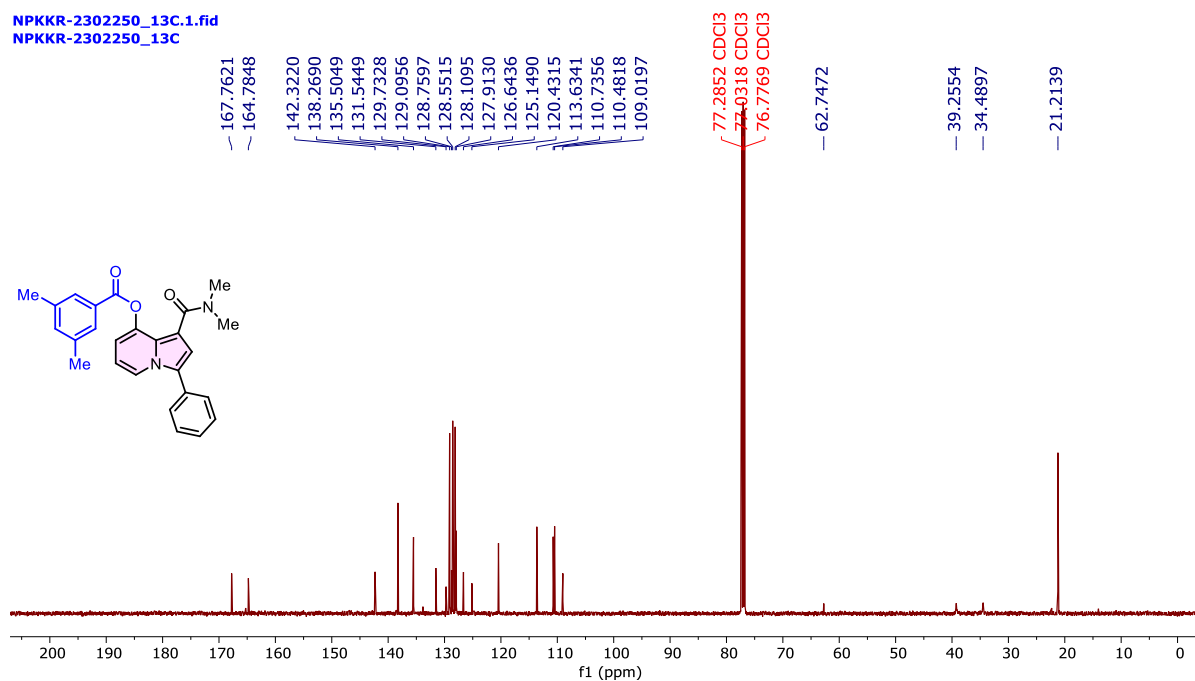

<sup>13</sup>C{<sup>1</sup>H} NMR (125 MHz, CDCl<sub>3</sub>) of 1-(Dimethylcarbamoyl)-3-phenylindolizin-8-yl 3,5-dimethyl benzoate. (**3a**).

NPKKR-E279 1H.1.fid  
NPKKR-E279 1H

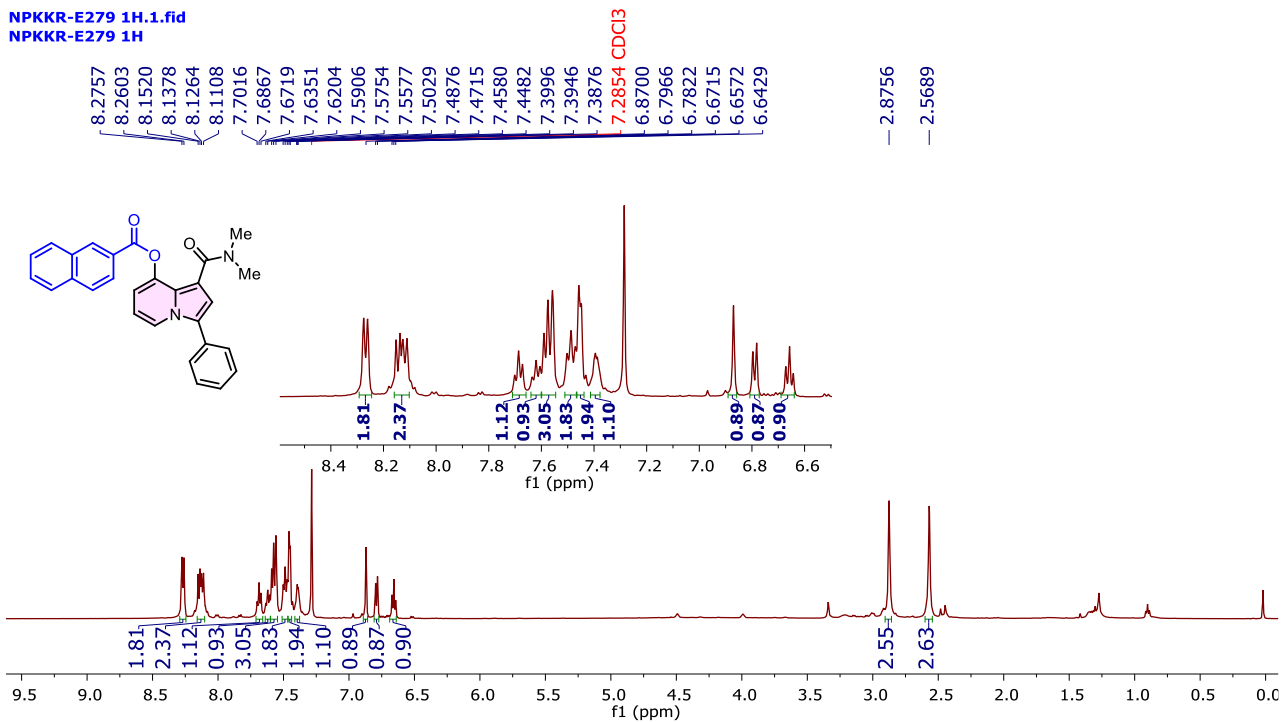

<sup>1</sup>H NMR (500 MHz, CDCl<sub>3</sub>) 1-(Dimethylcarbamoyl)-3-phenylindolizin-8-yl 2-naphthoate. (**3am**)

NPKKR-E279 13C.1.fid  
NPKKR-E279 13C

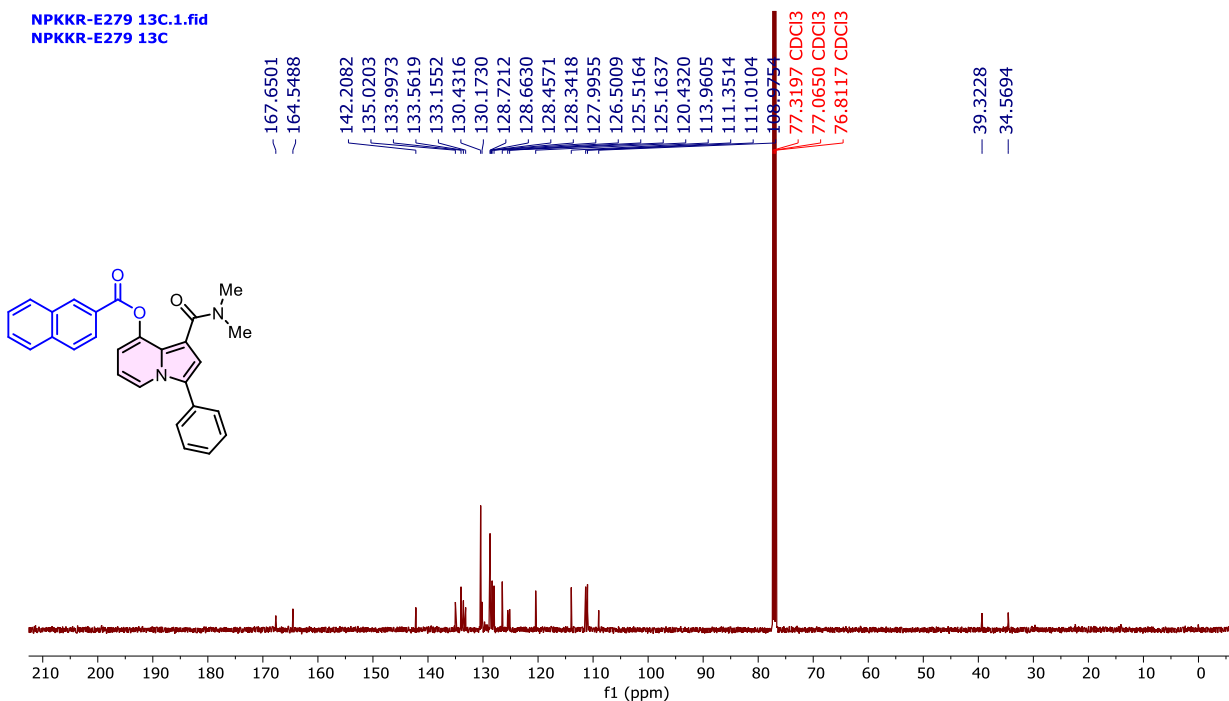

<sup>13</sup>C NMR (125 MHz, CDCl<sub>3</sub>) 1-(Dimethylcarbamoyl)-3-phenylindolizin-8-yl 2-naphthoate. (**3am**)

NPKKR-E293 1H.1.fid  
NPKKR-E293 1H

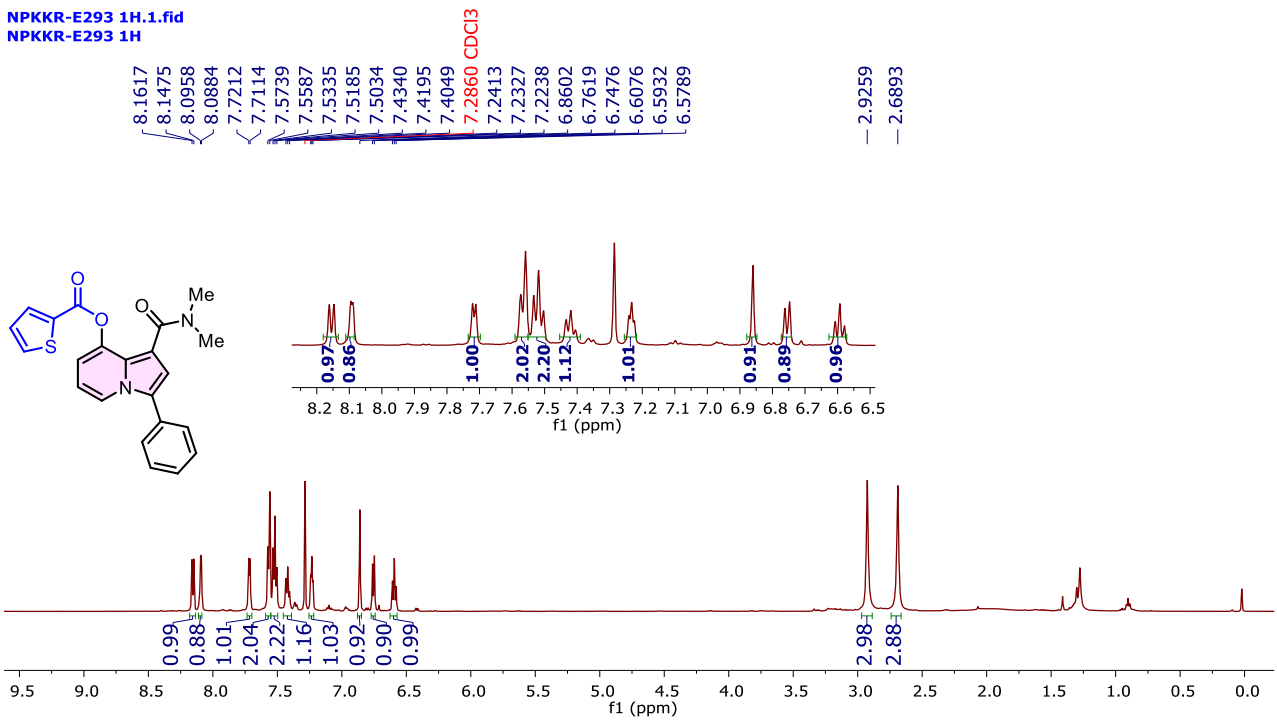

<sup>1</sup>H NMR (500 MHz, CDCl<sub>3</sub>) of 1-(Dimethylcarbamoyl)-3-phenylindolizin-8-yl thiophene-2-carboxylate. (3an)

NPKKR-E293 13C.1.fid  
NPKKR-E293 13C

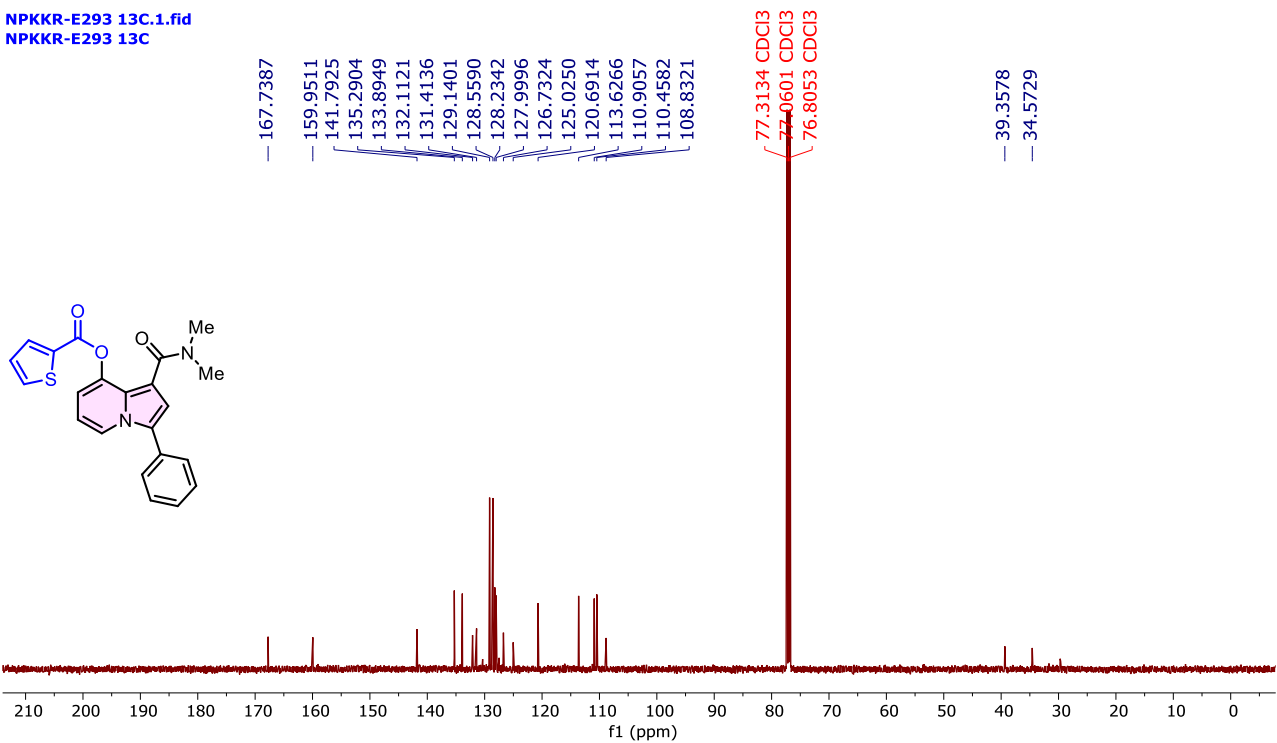

<sup>13</sup>C NMR (125 MHz, CDCl<sub>3</sub>) of 1-(Dimethylcarbamoyl)-3-phenylindolizin-8-yl thiophene-2-carboxylate. (3an)

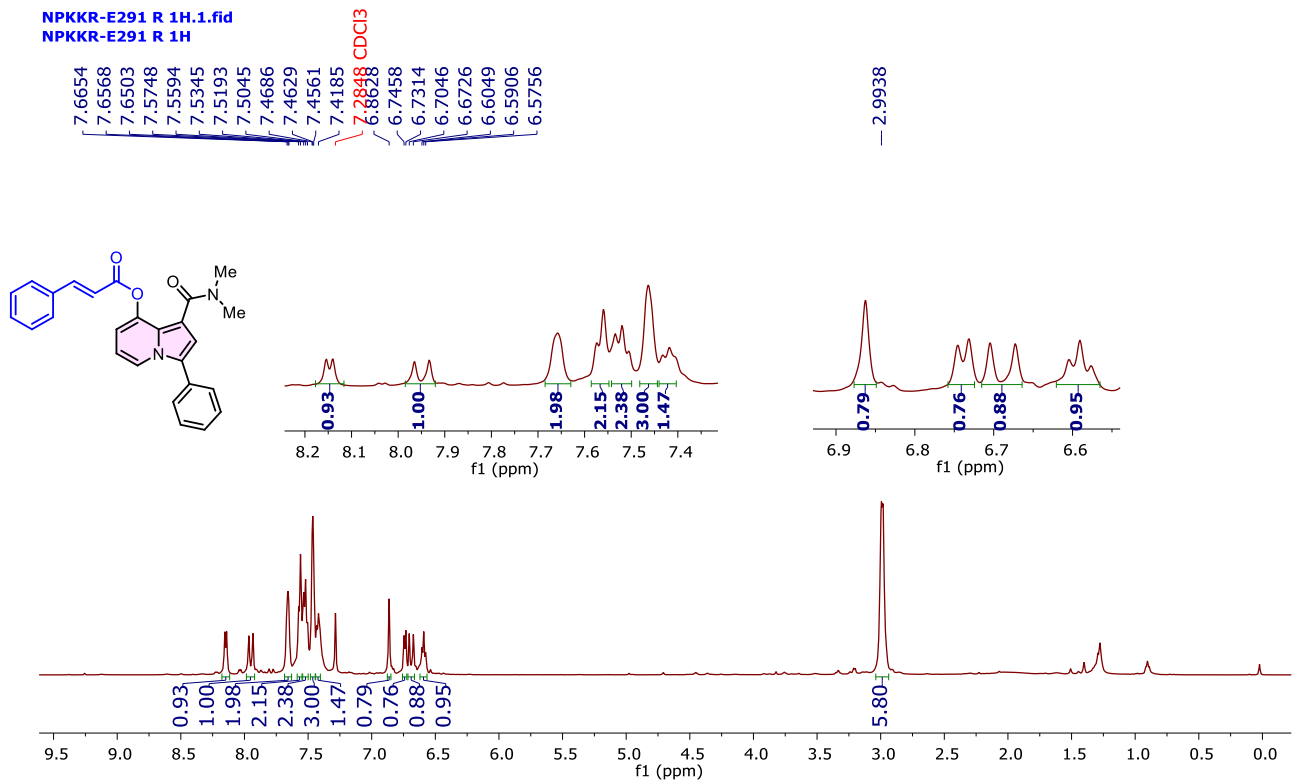

<sup>1</sup>H NMR (500 MHz, CDCl<sub>3</sub>) of 1-(Dimethylcarbamoyl)-3-phenylindolizin-8-yl (E)-3-phenylacrylate (**3ao**).

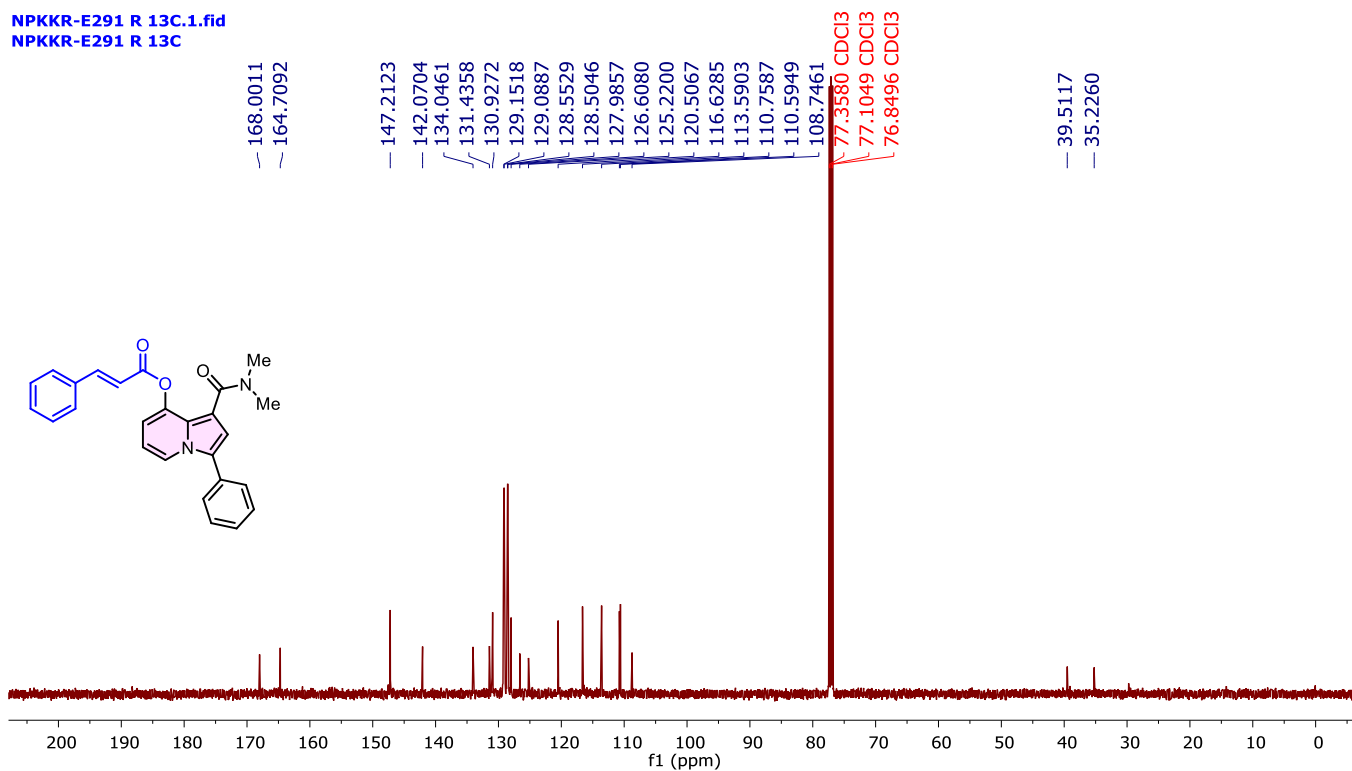

<sup>13</sup>C{<sup>1</sup>H} NMR (125 MHz, CDCl<sub>3</sub>) of 1-(Dimethylcarbamoyl)-3-phenylindolizin-8-yl (E)-3-phenylacrylate (**3ao**).

NPKKR-E295 1H.1.fid  
NPKKR-E295 1H

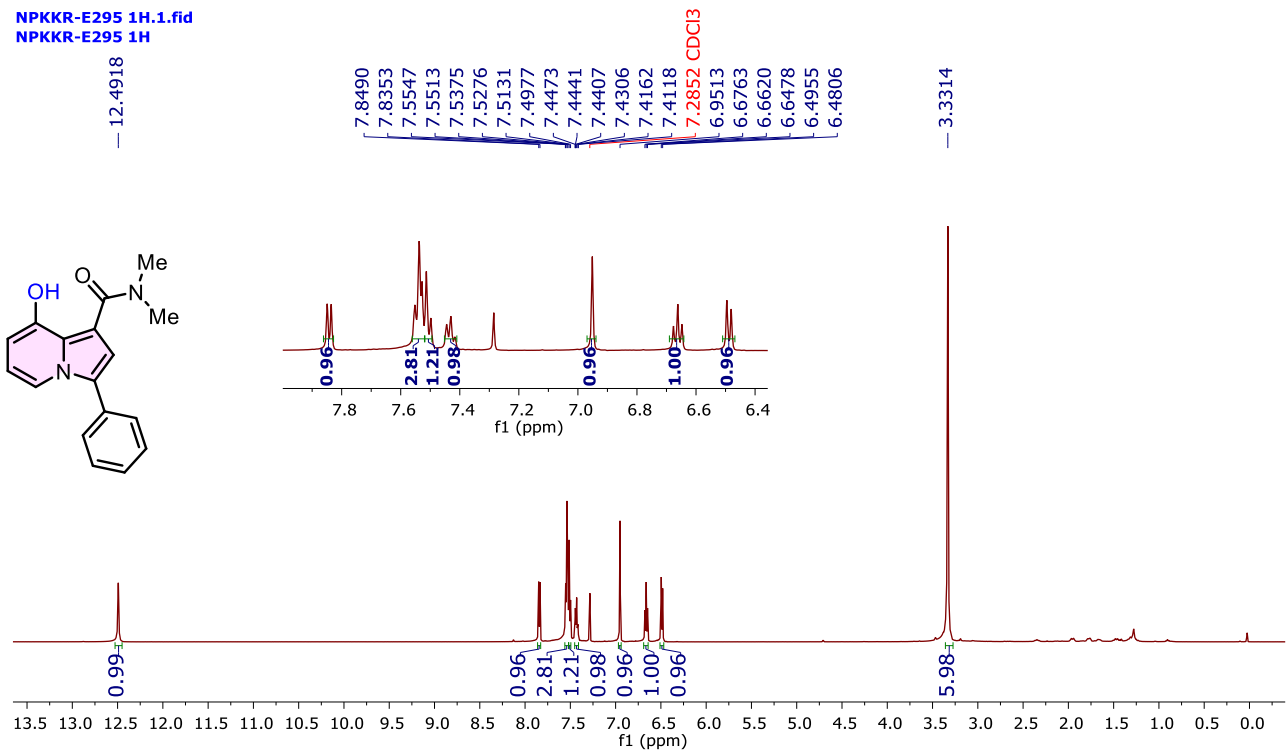

<sup>1</sup>H NMR (500 MHz, CDCl<sub>3</sub>) of 8-Hydroxy-N,N-dimethyl-3-phenylindolizine-1-carboxamide (4a)

NPKKR-E295 13C.1.fid  
NPKKR-E295 13C

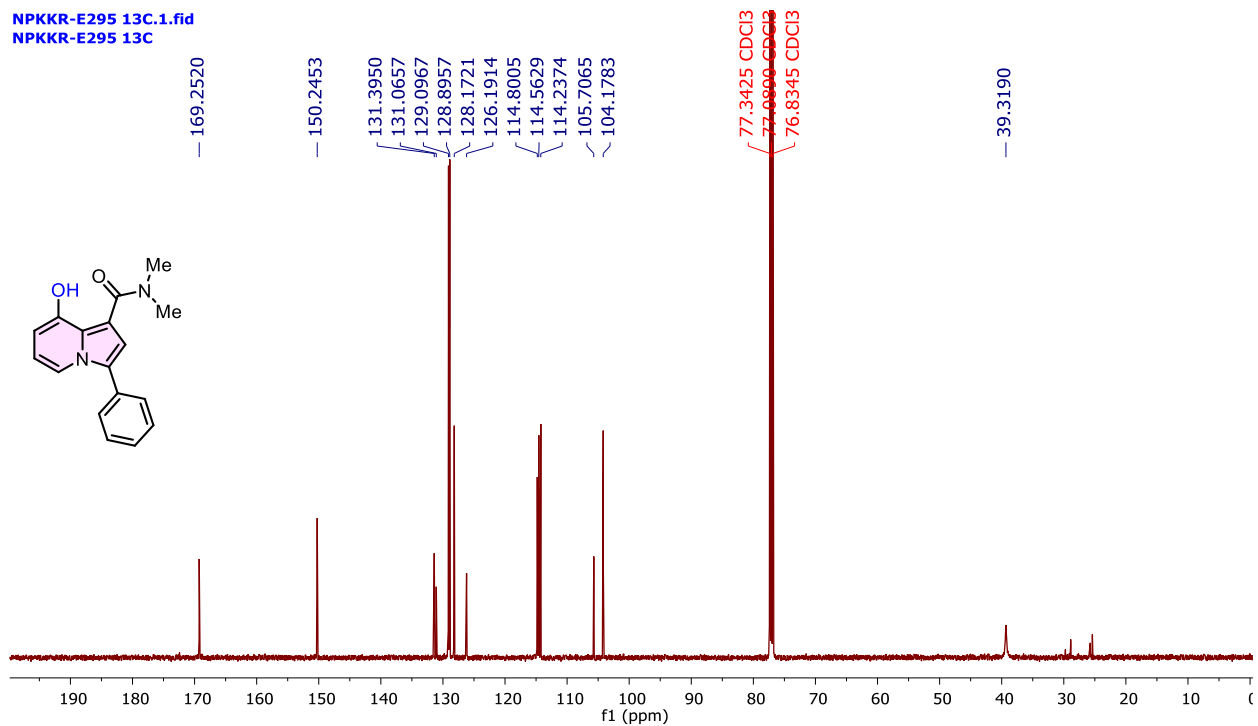

<sup>13</sup>C NMR (125 MHz, CDCl<sub>3</sub>) of 8-Hydroxy-N,N-dimethyl-3-phenylindolizine-1-carboxamide (4a)

NPKKR-E383\_1H.1.fid  
NPKKR-E383\_1H

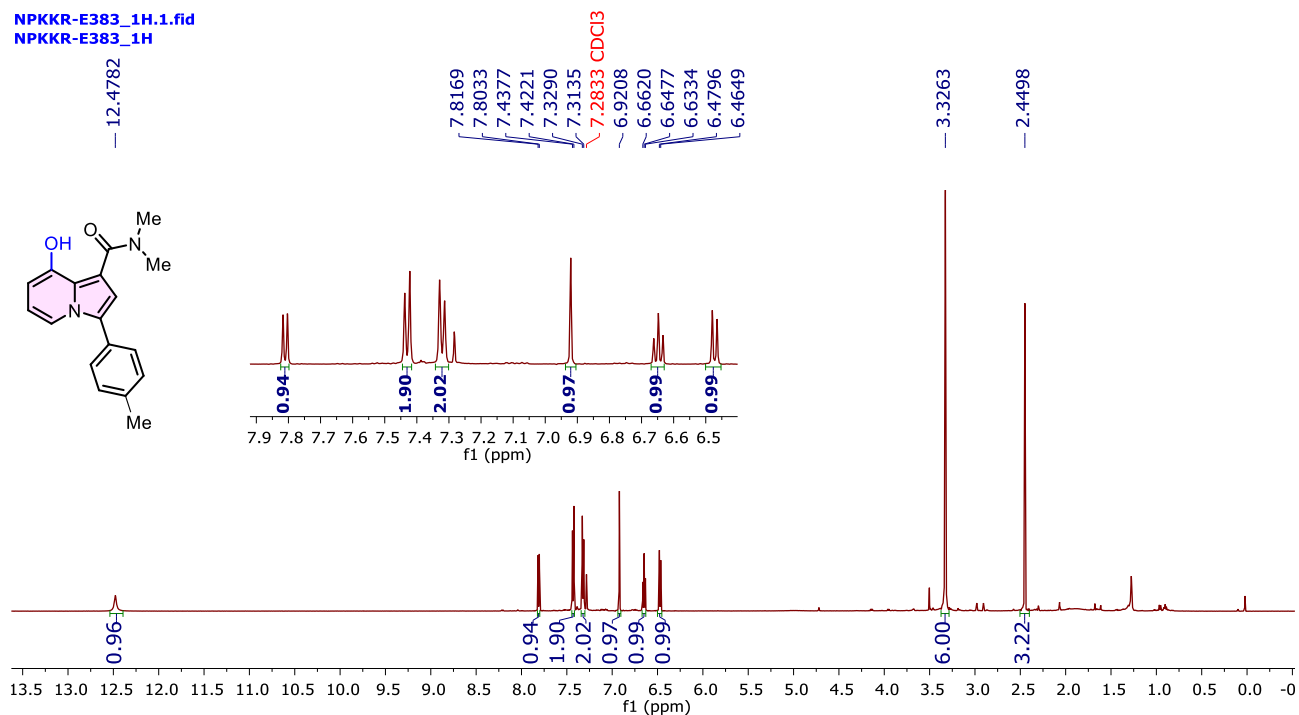

<sup>1</sup>H NMR (500 MHz, CDCl<sub>3</sub>) of 8-Hydroxy-N,N-dimethyl-3-(p-tolyl)indolizine-1-carboxamide (**4b**)

NPKKR-E383\_13C.1.fid  
NPKKR-E383\_13C

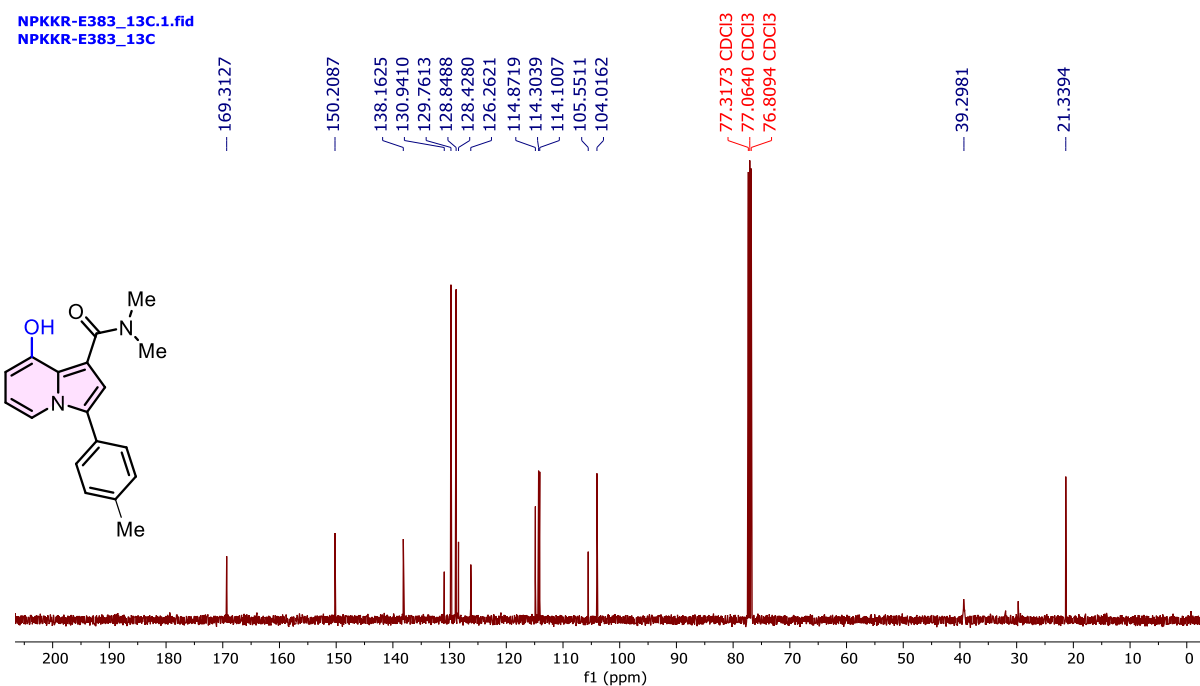

<sup>13</sup>C NMR (125 MHz, CDCl<sub>3</sub>) of 8-Hydroxy-N,N-dimethyl-3-(p-tolyl)indolizine-1-carboxamide (**4b**)

NPKKR-E336 1H.1.fid  
NPKKR-E336 1H

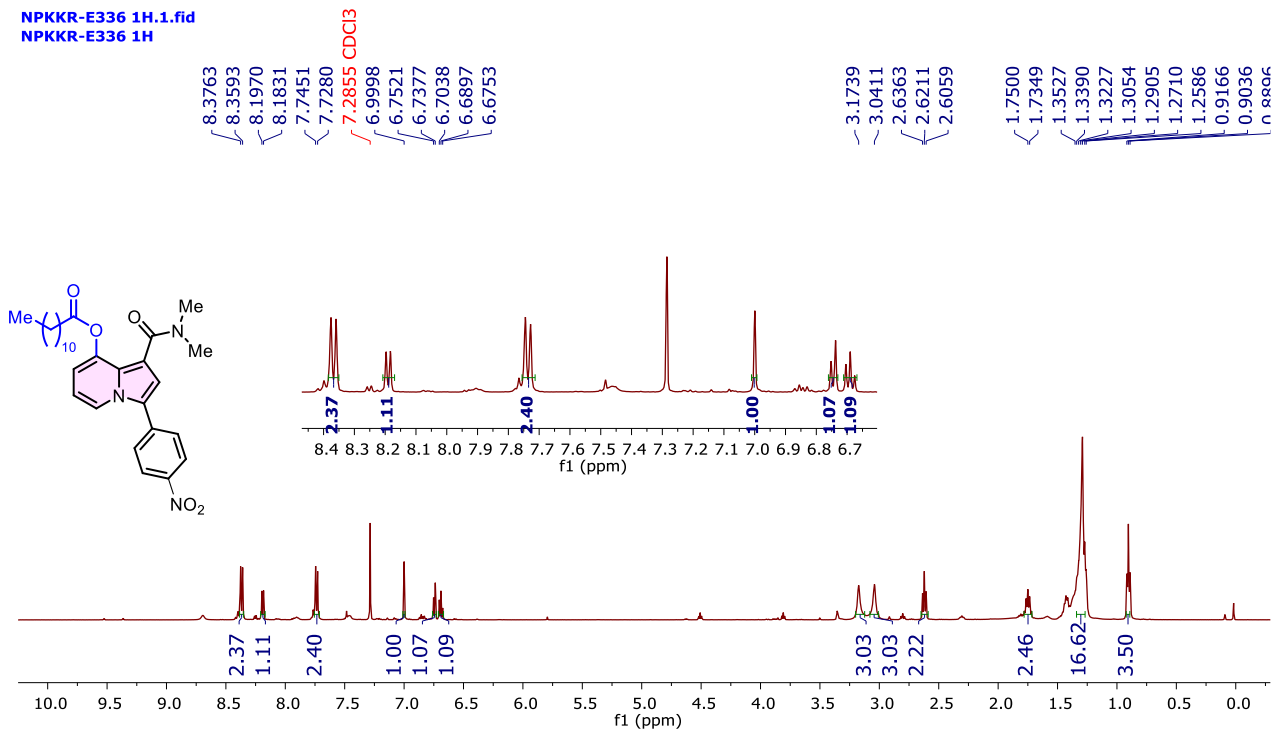

<sup>1</sup>H NMR (500 MHz, CDCl<sub>3</sub>) of 1-(Dimethylcarbamoyl)-3-(4-nitrophenyl)indolizin-8-yl dodecanoate (**3eq**).

NPKKR-E336\_13C.1.fid  
NPKKR-E336\_13C

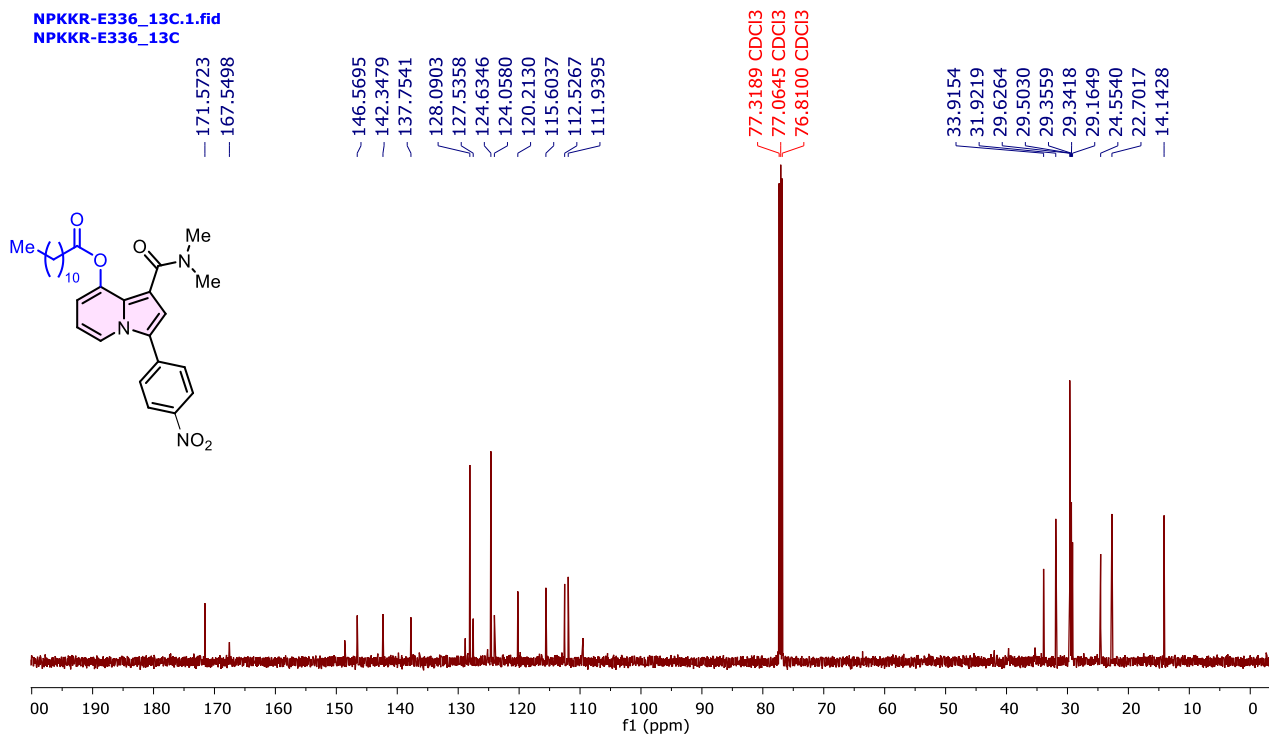

<sup>13</sup>C{<sup>1</sup>H} NMR (125 MHz, CDCl<sub>3</sub>) of 1-(Dimethylcarbamoyl)-3-(4-nitrophenyl)indolizin-8-yl dodecanoate (**3eq**).

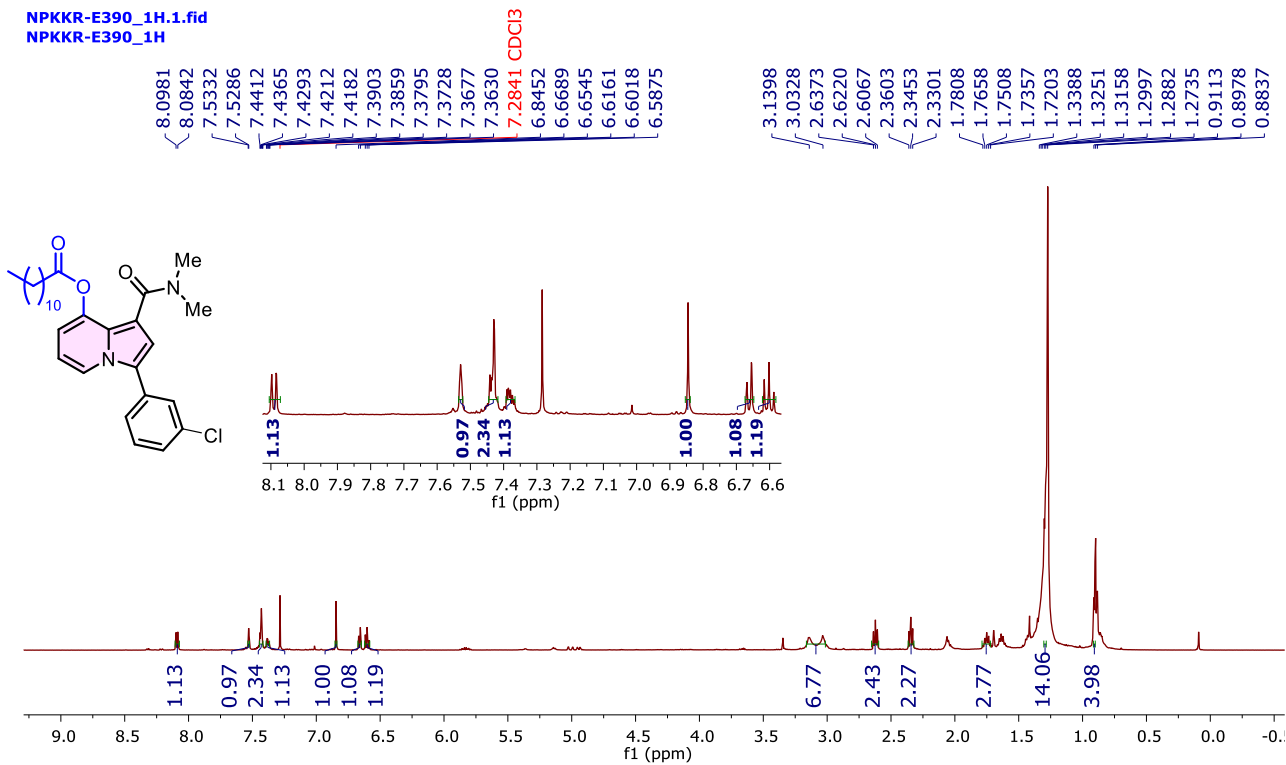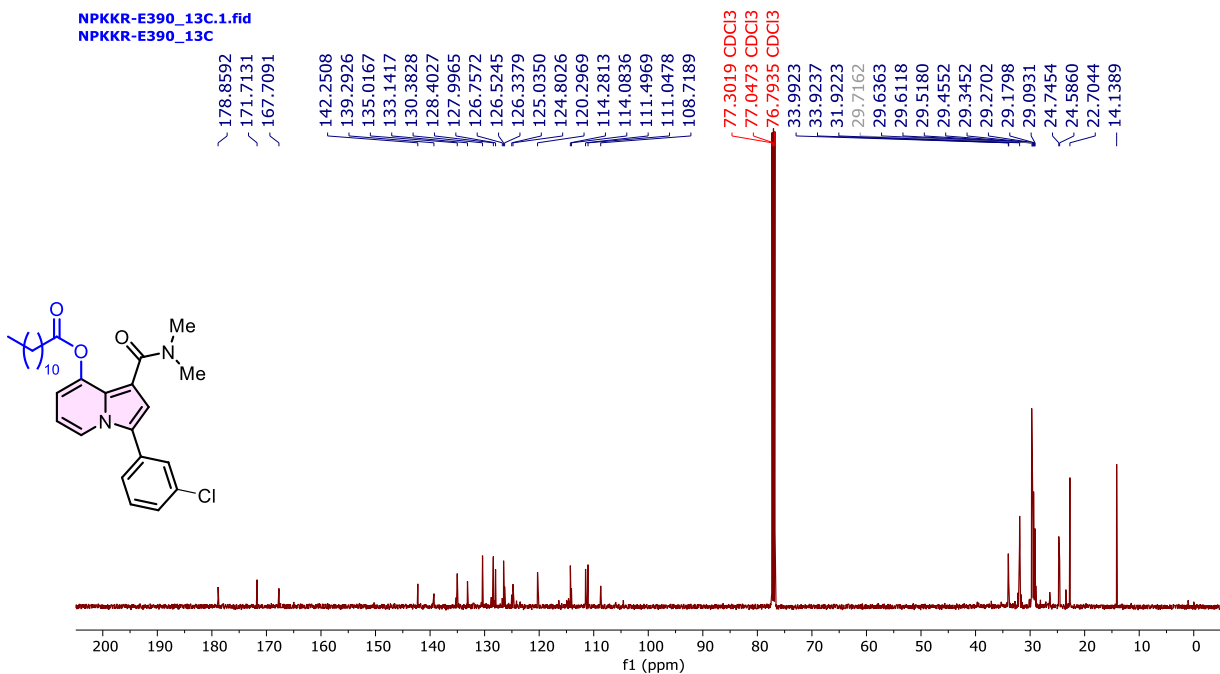

NPKKR-240984\_1H.1.fid  
NPKKR-240984\_1H

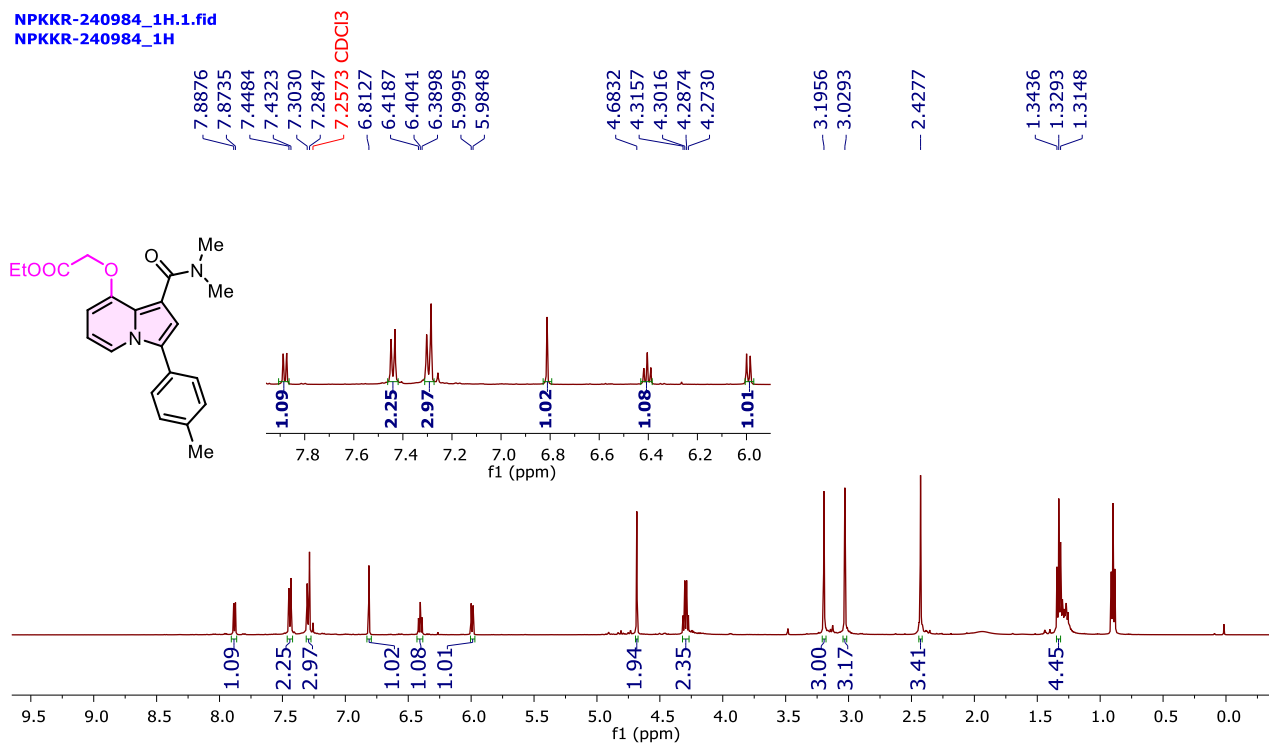

<sup>1</sup>H NMR (500MHz) of Ethyl 2-((1-(dimethylcarbamoyl)-3-(p-tolyl)indolizin-8-yl)oxy)acetate (5).

NPKKR-240984\_13C.1.fid  
NPKKR-240984\_13C

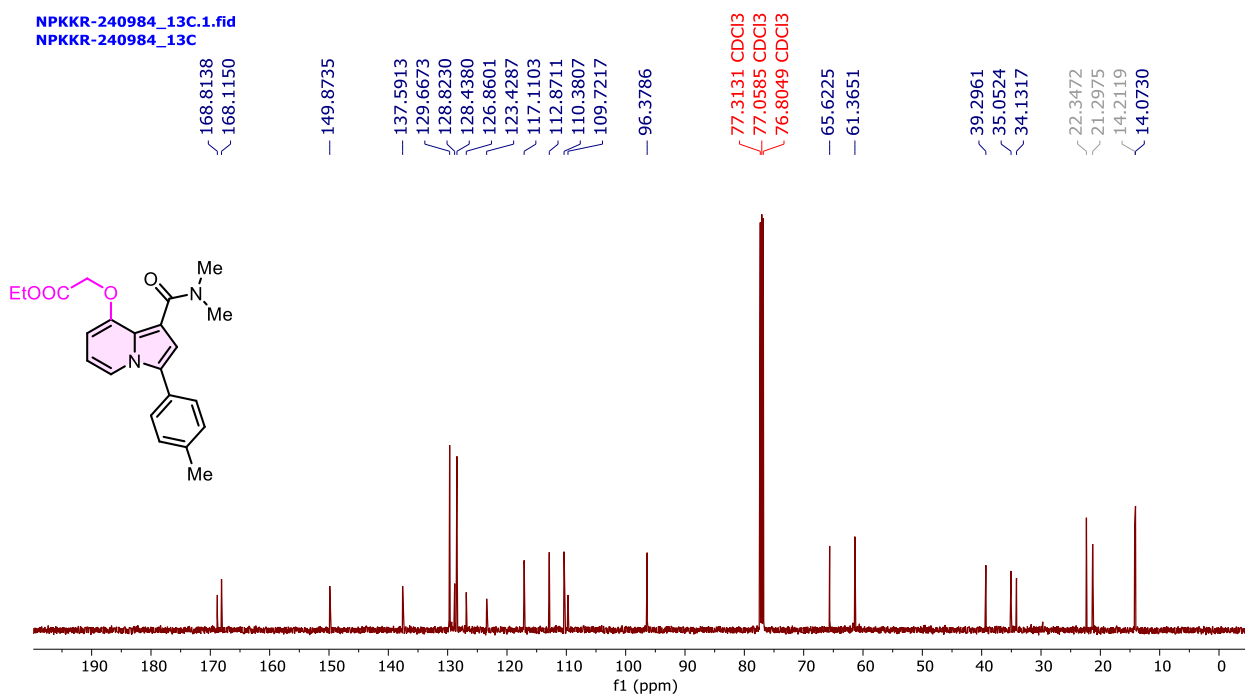

<sup>13</sup>C NMR (500MHz) of Ethyl 2-((1-(dimethylcarbamoyl)-3-(p-tolyl)indolizin-8-yl)oxy)acetate (5).
